# Supplementary material for: Risk factors for overtaking, rear-end, and door crashes involving bicycles in the United Kingdom: Revisited and reanalysed
Source: PubMed Central journal article supplement (PMC11698528; doi:10.1371/journal.pone.0315692), 2025-01-03
Supplement: pone.0315692.s006.pdf [file pone.0315692.s006.pdf]

# PLOS ONE

## Risk Factors for Overtaking, Rear-End, and Door Crashes Involving Bicycles in the United Kingdom: Revisited and Reanalysed

--Manuscript Draft--

|                              |                                                                                                                                                                                                                                                                                                                                                                                                                                                                                                                                                                                                                                                                                                                                                                                                                                                                                                                                                                                                                                                                                                                                                                                                                                                                                                                                                                                                                                                                                                                                                                                                                                                                                                                                                                                                                                                                                                                                                                                                                                                                                                                                                                                                                                                                                             |
|------------------------------|---------------------------------------------------------------------------------------------------------------------------------------------------------------------------------------------------------------------------------------------------------------------------------------------------------------------------------------------------------------------------------------------------------------------------------------------------------------------------------------------------------------------------------------------------------------------------------------------------------------------------------------------------------------------------------------------------------------------------------------------------------------------------------------------------------------------------------------------------------------------------------------------------------------------------------------------------------------------------------------------------------------------------------------------------------------------------------------------------------------------------------------------------------------------------------------------------------------------------------------------------------------------------------------------------------------------------------------------------------------------------------------------------------------------------------------------------------------------------------------------------------------------------------------------------------------------------------------------------------------------------------------------------------------------------------------------------------------------------------------------------------------------------------------------------------------------------------------------------------------------------------------------------------------------------------------------------------------------------------------------------------------------------------------------------------------------------------------------------------------------------------------------------------------------------------------------------------------------------------------------------------------------------------------------|
| <b>Manuscript Number:</b>    | PONE-D-24-17126R2                                                                                                                                                                                                                                                                                                                                                                                                                                                                                                                                                                                                                                                                                                                                                                                                                                                                                                                                                                                                                                                                                                                                                                                                                                                                                                                                                                                                                                                                                                                                                                                                                                                                                                                                                                                                                                                                                                                                                                                                                                                                                                                                                                                                                                                                           |
| <b>Article Type:</b>         | Research Article                                                                                                                                                                                                                                                                                                                                                                                                                                                                                                                                                                                                                                                                                                                                                                                                                                                                                                                                                                                                                                                                                                                                                                                                                                                                                                                                                                                                                                                                                                                                                                                                                                                                                                                                                                                                                                                                                                                                                                                                                                                                                                                                                                                                                                                                            |
| <b>Full Title:</b>           | Risk Factors for Overtaking, Rear-End, and Door Crashes Involving Bicycles in the United Kingdom: Revisited and Reanalysed                                                                                                                                                                                                                                                                                                                                                                                                                                                                                                                                                                                                                                                                                                                                                                                                                                                                                                                                                                                                                                                                                                                                                                                                                                                                                                                                                                                                                                                                                                                                                                                                                                                                                                                                                                                                                                                                                                                                                                                                                                                                                                                                                                  |
| <b>Short Title:</b>          | Risk Factors for Overtaking, Rear-End, and Door Crashes Involving Bicycles in the United Kingdom                                                                                                                                                                                                                                                                                                                                                                                                                                                                                                                                                                                                                                                                                                                                                                                                                                                                                                                                                                                                                                                                                                                                                                                                                                                                                                                                                                                                                                                                                                                                                                                                                                                                                                                                                                                                                                                                                                                                                                                                                                                                                                                                                                                            |
| <b>Corresponding Author:</b> | Chih-Wei Pai<br>Taipei Medical University<br>Taipei, TAIWAN                                                                                                                                                                                                                                                                                                                                                                                                                                                                                                                                                                                                                                                                                                                                                                                                                                                                                                                                                                                                                                                                                                                                                                                                                                                                                                                                                                                                                                                                                                                                                                                                                                                                                                                                                                                                                                                                                                                                                                                                                                                                                                                                                                                                                                 |
| <b>Keywords:</b>             | Bicycle crash; Road segment; Overtaking crash; Rear-end crash; Door crash                                                                                                                                                                                                                                                                                                                                                                                                                                                                                                                                                                                                                                                                                                                                                                                                                                                                                                                                                                                                                                                                                                                                                                                                                                                                                                                                                                                                                                                                                                                                                                                                                                                                                                                                                                                                                                                                                                                                                                                                                                                                                                                                                                                                                   |
| <b>Abstract:</b>             | <p><b>Objectives</b></p> <p>Relevant research has provided valuable insights into risk factors for bicycle crashes at intersections. However, few studies have focused explicitly on three common types of bicycle crashes on road segments: overtaking, rear-end, and door crashes. This study aims to identify risk factors for overtaking, rear-end, and door crashes that occur on road segment.</p> <p><b>Material and methods</b></p> <p>We analysed British STATS19 accident records from 1991 to 2020. Using multivariate logistic regression models, we estimated adjusted odds ratios (AORs) with 95% confidence intervals (CIs) for multiple risk factors. The analysis included 127,637 bicycle crashes, categorised into 18,350 overtaking, 44,962 rear-end, 6,363 door, and 57,962 other crashes. overtaking, 44,962 rear-end, 6,363 door, and 57,962 other crashes.</p> <p><b>Results</b></p> <p>Significant risk factors for overtaking crashes included speed limits of <math>\geq 40</math> miles per hour (mph) (AOR = 2.238, 95% CI = 2.159–2.320), heavy goods vehicles (HGVs) as crash partners (AOR = 2.867, 95% CI = 2.473–3.323), and elderly crash partners (AOR = 2.013, 95% CI = 1.937–2.092). For rear-end crashes, noteworthy risk factors included unlit darkness (AOR = 1.486, 95% CI = 1.404–1.573) and midnight hours (AOR = 1.269, 95% CI = 1.190–1.354). Factors associated with door crashes included speed limits of 20–30 mph (AOR = 16.185, 95% CI = 13.514–19.382) and taxi and private hire cars (AOR = 2.695, 95% CI = 2.310–3.145). Our joint-effect analysis revealed additional interesting results; for example, there were elevated risks for overtaking crashes in rural areas with elderly drivers as crash partners (AOR = 2.93, 95% CI = 2.79–3.08) and with HGVs as crash partners (AOR = 2.62, 95% CI = 2.46–2.78).</p> <p><b>Conclusions</b></p> <p>The aforementioned risk factors remained largely unchanged since 2011, when we conducted our previous study. However, the present study concluded that the detrimental effects of certain variables became more pronounced in certain situations. For example, cyclists in rural settings exhibited an elevated risk of overtaking crashes involving HGVs as crash partners.</p> |
| <b>Order of Authors:</b>     | <p>Chun-Chieh Chao</p> <p>Hon-Ping Ma</p> <p>Li Wei</p>                                                                                                                                                                                                                                                                                                                                                                                                                                                                                                                                                                                                                                                                                                                                                                                                                                                                                                                                                                                                                                                                                                                                                                                                                                                                                                                                                                                                                                                                                                                                                                                                                                                                                                                                                                                                                                                                                                                                                                                                                                                                                                                                                                                                                                     |

|                      |
|----------------------|
| Yen-Nung Lin         |
| Chenyi Chen          |
| Wafaa Saleh          |
| Bayu Satria Wiratama |
| Akhmad Fajri Widodo  |
| Shou-Chien Hsu       |
| Shih Yu Ko           |
| Hui-An Lin           |
| Cheng-Wei Chan       |
| Chih-Wei Pai         |

**Response to Reviewers:**

Dear Editors and Reviewers,  
 We greatly appreciate the valuable comments and suggestions raised by reviewers. Please very kindly see our responses below, as well as the revised manuscript. We would be glad if you could have our manuscript reviewed again.

Best regards,

Chih-Wei Pai (Prof)  
 Graduate Institute of Injury Prevention and Control College of Public Health  
 Taipei Medical University

Reviewer 2:

1.1 In the Abstract as well as in the results (main text) AOR sometimes expressed with three digits (decimals) and other places two decimals (please consider and use effective digits “decimals”).  
 Author’s response: We appreciate the reviewer’s comment and suggestions. All AORs have been amended to two decimals (Please refer to lines 34 to 40 on page 2 in the manuscript).

1.2 In the abstract “results section”: the AOR are sometimes very narrow (please explain).  
 Author’s response: We appreciate the reviewer’s comment and question. The narrow confidence intervals (CIs) for the adjusted odds ratios (AORs) indicate high precision in our estimates. This precision is primarily due to our large sample size, which reduces variability and enhances reliability. For example, the AOR for “male as crash partner” in overtaking crashes is 1.28 with a CI of 1.25-1.33, reflecting a strong effect size and

contributing to the narrow CI. Variability and heterogeneity in the data can affect CI width. Risk factors with more consistent effects across the dataset often show narrower CIs (e.g., a).

Katz, M. H. (2011). *Multivariable Analysis: A Practical Guide for Clinicians and Public Health Researchers*.

1.3 In the introduction: word roundabouts are repeated “study demonstrated that roundabout significantly reduces -----“

Author’s response: We appreciate the reviewer’s comment and suggestions. We have revised the manuscript. (Please refer to lines 74 to 76; page 4 in the manuscript): “One study found that roundabouts with dedicated cycle tracks significantly lower the risk of injury for cyclists compared to those without such bicycle infrastructure.”

1.4 In the rationale, the authors still need to emphasize the significance of the three types of crashes, this part of the introduction barely touched this point????

Author’s response: We appreciate the reviewer’s comment and suggestions. We have revised the manuscript. (Please refer to lines 104 to 110; pages 5 -6 in the manuscript): “The high mortality rate from crashes on road segments underscores the significant risks linked to overtaking, rear-end, and door crashes. Overtaking, involving high-speed maneuvers, greatly increases the likelihood of severe accidents. Rear-end crashes, frequently triggered by sudden stops or aggressive tailgating, pose a persistent threat to cyclists. Furthermore, injuries sustained by cyclists striking an opening car door can be devastating due to the impacts from the door, ground, or vehicles behind. These critical issues highlight the urgent need for identifying risk factors for these crashes.”

Statistical analysis:

1.5 - Rationale for considering p value of 0.2 at the univariate (bivariate) level to be incorporated in the multiple Logistic regression models???

Author’s response: We appreciate the reviewer’s comment and question. In the first and second round of review, this reviewer expressed concerns over our use of Chi-square tests to examine the relationship between three crash types and the independent variables. We have now opted to estimate the crude odds ratio by univariate logistic regressions. Please kindly see Table 4 lines 259 to 260; page 15 in the manuscript.

1.6- How the data were handled statistically: descriptive and inferential methods should be mentioned in this section

Author’s response: We appreciate the reviewer’s comment and question. In response to your comment, we have revised the section on statistical handling to provide a more comprehensive explanation of both the descriptive and inferential methods employed. (Please refer to lines 182 to 191; page 9 in the manuscript).

“We initially utilized descriptive statistics to examine the distribution of crash types across various variables such as lighting conditions, speed limit, time of day, and day of the week. Demographic details concerning cyclist casualties encompassed age and sex, while information about the crash partner included vehicle type, age, and sex. This preliminary analysis provided a general picture of basic characteristics of the data and identification of potential patterns. For inferential analysis, we applied the Chi-squared test to investigate associations between crash type and various factors, including cyclist and motorist characteristics, vehicle features, roadway conditions, and temporal variables. We then estimated crude odds ratios by estimating univariate logistic regression and adjusted odds ratios by multivariate logistic models, respectively.”

1.8- What type of model was used (stepwise, or else), how the model was tested to be fit???

Author’s response: We appreciate the reviewer’s comment and question. We used multivariate logistic regression with backward selection to compute adjusted odds ratios (AORs). This method involves initially including all potential predictors and then iteratively removing the least significant variables based on their p-values. In terms of model fit statistics, the final models were chosen based on the p2 statistics (e.g., b). The p2 statistics for the estimated models range from 0.327 to 0.398, indicating a reasonable model fit.

Ben-Akiva, M. E., & Lerman, S. R. (1985). Discrete choice analysis: theory and application to travel demand (Vol. 9). MIT press.

1.9- How the variables were categorized to be suitable for the inclusion of logistic regression analysis?

Author's response: We appreciate the reviewer's comment and question. Considering findings from past studies and selecting the model with the most parsimonious and robust statistical properties (e.g., goodness of fit, reasonable parameter magnitudes, and t-statistics), the variables were categorized and explained as follows:

First, age data were divided into four categories:  $\leq 18$  (not of legal driving age), 19–40, 41–64, and  $\geq 65$  (defined as older age by WHO standards). This classification highlights the different risk profiles associated with each age group.

The variable "time of crash" was classified into four periods—midnight (00:00–06:00), rush hours (07:00–08:00 and 17:00–18:00), non-rush hours (09:00–16:00), and evening (19:00–23:00)—to account for fluctuations in traffic patterns and accident likelihood throughout the day.

Speed limits were categorized by location into two types: nonbuilt-up areas (rural,  $\geq 40$  mph) and built-up areas (urban, 20–30 mph).

Day of the week was grouped as either weekday or weekend to evaluate variations in crash patterns.

These classifications have been commonly adopted in safety literature (e.g., c; d).

Widodo, Akhmad Fajri, et al. "Walking against traffic and pedestrian injuries in the United Kingdom: new insights." *BMC public health* 23.1 (2023): 2205.

Wiratama, Bayu Satria, et al. "Joint effect of heavy vehicles and diminished light conditions on paediatric pedestrian injuries in backover crashes: a UK population-based study." *International journal of environmental research and public health* 19.18 (2022): 11689.

110- The reference group in the multivariate regression table is not consistent along the three types of crashes??? Please explain.

Author's response: We appreciate the reviewer's comment and question. The reference groups in the univariate and multivariate analysis have been assigned consistent. Please kindly see Table 4 lines 259 to 260; pages 14-15 and Table 5 lines 292 to 293; pages 16-17 in the manuscript.

1.11- Joint sensitivity analysis should be mentioned in this section "indication, methods and output"

Author's response: We appreciate the reviewer's insightful comments and suggestions. To illustrate the effectiveness of models with joint effects, we found that these models produced a higher log-likelihood at convergence and demonstrated an improved overall fit, as indicated by a better  $p^2$  statistic.

Moreover, we performed a likelihood ratio test (e.g., e) to confirm the superiority of the joint effects models over the general models. The test statistic is given by:

$$\chi^2 = -2[LL(\beta_G) - LL(\beta_J)]$$

Where  $LL(\beta_G)$  represents the log-likelihood at convergence for the general model, and  $LL(\beta_J)$  is for the joint effects model. This statistic follows a  $\chi^2$  distribution, with degrees of freedom equal to the difference in the number of parameters between the general and joint effects models.

Vuong, Q.H., 1989. Likelihood ratio tests for model selection and non-nested hypothesis. *Econometrica* 57, 307-333.

Results:

1.12- The previous comments on using the Chi-square test remained the same??? Non-specific, non-parametric test and can't point out to the direction of significance???

Author's response: We appreciate this reviewer's comment. In addition to the multivariate logistic regression, we have now estimated the univariate logistic regression models. Please kindly see Table 4 lines 259 to 260; pages 14-15 and Table 5 lines 292 to 293; pages 16-17 in the manuscript.

1.13- What software used to produce figure 2???

Author's response: We appreciate the reviewer's comment and question. We recreated the figure from the previous article (e.g., f) using Photoshop and then edited it in



PowerPoint.

Pai C-W. Overtaking, rear-end, and door crashes involving bicycles: an empirical investigation. *Accid Anal Prev.* 2011;43(3):1228-35.

#### Review 4

4.1 This has been addressed but in the main document start with background under the background sentences, conclude it with the objective, instead of presenting it as a separate paragraph.

Author's response: We appreciate the reviewer's comment and suggestions. We have revised the manuscript. (please refer to lines 23 to 27 ; page 2 in the manuscript):  
"Background and Objective: Relevant research has provided valuable insights into risk factors for bicycle crashes at intersections. However, few studies have focused explicitly on three common types of bicycle crashes on road segments: overtaking, rear-end, and door crashes. This study aims to identify risk factors for overtaking, rear-end, and door crashes that occur on road segments."

4.2 I understand this response; however, you need to conduct a normality check for all continuous variables like age and others like distance. This helps you to present either the mean age or the median age

Author's response: We appreciate the reviewer's comment and suggestions. Normality check for continuous variables is needed only while estimating a linear regression model. In our study, we estimated several logistic models in which testing for normality and homoscedasticity is not needed. For a comprehensive discussion on the derivation of logistic regression models, see Hosmer et al. (e.g., g).

g. Hosmer Jr, David W., Stanley Lemeshow, and Rodney X. Sturdivant. *Applied logistic regression.* John Wiley & Sons, 2013.

4.3 N(%) consider using this type of reforestation and removed the percentage signs from the table

Author's response: We appreciate the reviewer's comment and suggestions. We have removed the percentage signs and replaced them with "n (%)" in the tables 1, 2 and 3. (Please refer to lines 221-222 of page 11; lines 237 -238 of pages 12- 13; lines 254-255 of pages 13- 14 in the manuscript).

4.4 Data analysed should replace this, you didn't collect data

Author's response: We appreciate the reviewer's comment and suggestions. We have revised the manuscript. (Please refer to lines 160; page 8 in the manuscript):  
"Data analysis"

4.5 I insist this be removed, but keep the proportion there and take this up and say N(%) or read other publication to see how this is presented

Author's response: We appreciate the reviewer's comment and suggestions. We have removed the percentage signs and replaced them with "n (%)" in the table1, 2 and 3. Please refer to lines 221-222 of page 11; lines 237 -238 of pages 12- 13; lines 254-255 of pages 13- 14 in the manuscript.

4.6 This has not been fully addressed. What the authors did was just introduced the corresponding Odds Ratios and P-Values but no result interpretation. Consider doing something like this, "having a HGVs as crash partners had 2.9 times higher likelihood of being involved in overtaking crash", something like this for all the significant variables.

Author's response: We appreciate the reviewer's comment and suggestions. We have revised the manuscript. (Please refer to 293 to 295; page 17 in the manuscript):

"In overtaking crashes, the presence of heavy goods vehicles (HGVs) as partners increases the likelihood by 1.3 times (AOR = 1.30, 95% CI = 1.27-1.33; p < 0.001)."

4.7 This has now been introduced, however, start with what you found, then bring the reason supporting those findings and lastly place it in the context of other study and cite it.

Author's response: We appreciate the reviewer's comment and suggestions. We have outlined the reasons supporting these findings and, finally, situated them within the context of existing research, providing appropriate citations. (Please refer to lines 344 to 347; pages 19-20 in the manuscript):

"Their large blind spots make it difficult for drivers to see cyclists, increasing the likelihood of crashes during overtaking [e.g., c]. Additionally, HGVs are less

|                                                                                                                                                                                                                                                                                                                                                                                                                                                                                                                                                                                                                                                                                                                                                                                                                                                                                                                                                                                                                                      |                                                                                                                                                                                                                                                                                                                                                                                                                                                                                                                                                                                                                                                                                                                                                                                                                                                                                                                                                                                                                                                                                                                                                                                                                                                                                                                                                                                                                                                                                                                    |
|--------------------------------------------------------------------------------------------------------------------------------------------------------------------------------------------------------------------------------------------------------------------------------------------------------------------------------------------------------------------------------------------------------------------------------------------------------------------------------------------------------------------------------------------------------------------------------------------------------------------------------------------------------------------------------------------------------------------------------------------------------------------------------------------------------------------------------------------------------------------------------------------------------------------------------------------------------------------------------------------------------------------------------------|--------------------------------------------------------------------------------------------------------------------------------------------------------------------------------------------------------------------------------------------------------------------------------------------------------------------------------------------------------------------------------------------------------------------------------------------------------------------------------------------------------------------------------------------------------------------------------------------------------------------------------------------------------------------------------------------------------------------------------------------------------------------------------------------------------------------------------------------------------------------------------------------------------------------------------------------------------------------------------------------------------------------------------------------------------------------------------------------------------------------------------------------------------------------------------------------------------------------------------------------------------------------------------------------------------------------------------------------------------------------------------------------------------------------------------------------------------------------------------------------------------------------|
|                                                                                                                                                                                                                                                                                                                                                                                                                                                                                                                                                                                                                                                                                                                                                                                                                                                                                                                                                                                                                                      | <p>manoeuvrable compared to passenger cars, which reduces their ability to avoid crashes if cyclists suddenly enter their path [e.g., d]. The speed and distance perception issues between HGVs and cyclists further complicate the judgment of safe overtaking gaps[e.g., e].”</p> <p>c. Marshall, Russell, and Stephen Summerskill. "An objective methodology for blind spot analysis of HGVs using a DHM approach." DS 87-8 Proceedings of the 21st International Conference on Engineering Design (ICED 17) Vol 8: Human Behaviour in Design, Vancouver, Canada, 21-25.08. 2017. 2017.</p> <p>d. Frings, Daniel, Andy Rose, and Anne M. Ridley. "Bicyclist fatalities involving heavy goods vehicles: Gender differences in risk perception, behavioral choices, and training." Traffic injury prevention 13.5 (2012): 493-498.</p> <p>e. Chew, Esther Li-Wen, and Amanda Stephens. "Human Factors That Impact HGV Drivers From Being Aware of VRUs Through Direct and Indirect Vision Mechanisms." 4.8 I think you need to reference this in the method section also where you discussed the data source. Some readers don't reach here</p> <p>Author's response: We appreciate the reviewer's comment and suggestions. We have revised the manuscript. (please refer to 135 to 137; page 7 in the manuscript): "The data that support the findings of this study are openly available at <a href="https://figshare.com/ndownloader/files/48173452">https://figshare.com/ndownloader/files/48173452</a>."</p> |
| <b>Additional Information:</b>                                                                                                                                                                                                                                                                                                                                                                                                                                                                                                                                                                                                                                                                                                                                                                                                                                                                                                                                                                                                       |                                                                                                                                                                                                                                                                                                                                                                                                                                                                                                                                                                                                                                                                                                                                                                                                                                                                                                                                                                                                                                                                                                                                                                                                                                                                                                                                                                                                                                                                                                                    |
| <b>Question</b>                                                                                                                                                                                                                                                                                                                                                                                                                                                                                                                                                                                                                                                                                                                                                                                                                                                                                                                                                                                                                      | <b>Response</b>                                                                                                                                                                                                                                                                                                                                                                                                                                                                                                                                                                                                                                                                                                                                                                                                                                                                                                                                                                                                                                                                                                                                                                                                                                                                                                                                                                                                                                                                                                    |
| <p><b>Financial Disclosure</b></p> <p>Enter a financial disclosure statement that describes the sources of funding for the work included in this submission. Review the <a href="#">submission guidelines</a> for detailed requirements. View published research articles from <a href="#">PLOS ONE</a> for specific examples.</p> <p>This statement is required for submission and <b>will appear in the published article</b> if the submission is accepted. Please make sure it is accurate.</p> <p><b>Funded studies</b></p> <p>Enter a statement with the following details:</p> <ul style="list-style-type: none"> <li>• Initials of the authors who received each award</li> <li>• Grant numbers awarded to each author</li> <li>• The full name of each funder</li> <li>• URL of each funder website</li> <li>• Did the sponsors or funders play any role in the study design, data collection and analysis, decision to publish, or preparation of the manuscript?</li> </ul> <p>Did you receive funding for this work?</p> | <p>Yes</p>                                                                                                                                                                                                                                                                                                                                                                                                                                                                                                                                                                                                                                                                                                                                                                                                                                                                                                                                                                                                                                                                                                                                                                                                                                                                                                                                                                                                                                                                                                         |
| <p>Please add funding details. as follow-up to "<b>Financial Disclosure</b></p>                                                                                                                                                                                                                                                                                                                                                                                                                                                                                                                                                                                                                                                                                                                                                                                                                                                                                                                                                      | <p>This study received financial support from the Ministry of Science and Technology, Taiwan (MOST 110–2410-H-038-016-MY2 and MOST 109–2314-B-038-066-); New</p>                                                                                                                                                                                                                                                                                                                                                                                                                                                                                                                                                                                                                                                                                                                                                                                                                                                                                                                                                                                                                                                                                                                                                                                                                                                                                                                                                   |

|                                                                                                                                                                                                                                                                                                                                                                                                                                                                                                                                                                                                                                                                                                                                                                                                                                                                                                                                                                                                 |                                                                                                                                                                                                                                                                                  |
|-------------------------------------------------------------------------------------------------------------------------------------------------------------------------------------------------------------------------------------------------------------------------------------------------------------------------------------------------------------------------------------------------------------------------------------------------------------------------------------------------------------------------------------------------------------------------------------------------------------------------------------------------------------------------------------------------------------------------------------------------------------------------------------------------------------------------------------------------------------------------------------------------------------------------------------------------------------------------------------------------|----------------------------------------------------------------------------------------------------------------------------------------------------------------------------------------------------------------------------------------------------------------------------------|
| <p>Enter a financial disclosure statement that describes the sources of funding for the work included in this submission. Review the <a href="#">submission guidelines</a> for detailed requirements. View published research articles from <a href="#">PLOS ONE</a> for specific examples.</p> <p>This statement is required for submission and <b>will appear in the published article</b> if the submission is accepted. Please make sure it is accurate.</p> <p><b>Funded studies</b><br/>Enter a statement with the following details:</p> <ul style="list-style-type: none"> <li>• Initials of the authors who received each award</li> <li>• Grant numbers awarded to each author</li> <li>• The full name of each funder</li> <li>• URL of each funder website</li> <li>• Did the sponsors or funders play any role in the study design, data collection and analysis, decision to publish, or preparation of the manuscript?</li> </ul> <p>Did you receive funding for this work?"</p> | <p>Taipei City Hospital (NTPC113-002); and the National Science and Technology Council, Taiwan (NSTC 112-2410-H-038-016-MY2). The funders played no role in the design of the study, data collection and analysis, interpretation of data, or preparation of the manuscript.</p> |
| <p>Please select the country of your main research funder (please select carefully as in some cases this is used in fee calculation).</p> <p>as follow-up to "<b>Financial Disclosure</b></p> <p>Enter a financial disclosure statement that describes the sources of funding for the work included in this submission. Review the <a href="#">submission guidelines</a> for detailed requirements. View published research articles from <a href="#">PLOS ONE</a> for specific examples.</p> <p>This statement is required for submission and <b>will appear in the published article</b> if the submission is accepted. Please make sure it is accurate.</p>                                                                                                                                                                                                                                                                                                                                  | <p>TAIWAN - TW</p>                                                                                                                                                                                                                                                               |

### Funded studies

Enter a statement with the following details:

- Initials of the authors who received each award
- Grant numbers awarded to each author
- The full name of each funder
- URL of each funder website
- Did the sponsors or funders play any role in the study design, data collection and analysis, decision to publish, or preparation of the manuscript?

Did you receive funding for this work?"

### Competing Interests

Use the instructions below to enter a competing interest statement for this submission. On behalf of all authors, disclose any [competing interests](#) that could be perceived to bias this work—acknowledging all financial support and any other relevant financial or non-financial competing interests.

This statement is **required** for submission and **will appear in the published article** if the submission is accepted. Please make sure it is accurate and that any funding sources listed in your Funding Information later in the submission form are also declared in your Financial Disclosure statement.

View published research articles from [PLOS ONE](#) for specific examples.

The authors have declared that no competing interests exist.

**NO authors have competing interests**

Enter: *The authors have declared that no competing interests exist.*

**Authors with competing interests**

Enter competing interest details beginning with this statement:

*I have read the journal's policy and the authors of this manuscript have the following competing interests: [insert competing interests here]*

\* typeset

**Ethics Statement**

Enter an ethics statement for this submission. This statement is required if the study involved:

- Human participants
- Human specimens or tissue
- Vertebrate animals or cephalopods
- Vertebrate embryos or tissues
- Field research

Write "N/A" if the submission does not require an ethics statement.

General guidance is provided below. Consult the [submission guidelines](#) for detailed instructions. **Make sure that all information entered here is included in the Methods section of the manuscript.**

This study was approved by the Joint Institutional Review Board of Taipei Medical University (N202011030). The Joint Institutional Review Board of Taipei Medical University has waived the requirement of informed consent. All methods were performed in accordance with the relevant guidelines and regulations of the Declaration of Helsinki.

## Format for specific study types

### Human Subject Research (involving human participants and/or tissue)

- Give the name of the institutional review board or ethics committee that approved the study
- Include the approval number and/or a statement indicating approval of this research
- Indicate the form of consent obtained (written/oral) or the reason that consent was not obtained (e.g. the data were analyzed anonymously)

### Animal Research (involving vertebrate animals, embryos or tissues)

- Provide the name of the Institutional Animal Care and Use Committee (IACUC) or other relevant ethics board that reviewed the study protocol, and indicate whether they approved this research or granted a formal waiver of ethical approval
- Include an approval number if one was obtained
- If the study involved *non-human primates*, add *additional details* about animal welfare and steps taken to ameliorate suffering
- If anesthesia, euthanasia, or any kind of animal sacrifice is part of the study, include briefly which substances and/or methods were applied

### Field Research

Include the following details if this study involves the collection of plant, animal, or other materials from a natural setting:

- Field permit number
- Name of the institution or relevant body that granted permission

### Data Availability

Authors are required to make all data underlying the findings described fully available, without restriction, and from the time of publication. PLOS allows rare exceptions to address legal and ethical concerns. See the [PLOS Data Policy](#) and [FAQ](#) for detailed information.

Yes - all data are fully available without restriction

A Data Availability Statement describing where the data can be found is required at submission. Your answers to this question constitute the Data Availability Statement and **will be published in the article**, if accepted.

**Important:** Stating 'data available on request from the author' is not sufficient. If your data are only available upon request, select 'No' for the first question and explain your exceptional situation in the text box.

Do the authors confirm that all data underlying the findings described in their manuscript are fully available without restriction?

**Describe where the data may be found in full sentences. If you are copying our sample text, replace any instances of XXX with the appropriate details.**

- If the data are **held or will be held in a public repository**, include URLs, accession numbers or DOIs. If this information will only be available after acceptance, indicate this by ticking the box below. For example: *All XXX files are available from the XXX database (accession number(s) XXX, XXX).*
- If the data are all contained **within the manuscript and/or Supporting Information files**, enter the following: *All relevant data are within the manuscript and its Supporting Information files.*
- If neither of these applies but you are able to provide **details of access elsewhere**, with or without limitations, please do so. For example:

*Data cannot be shared publicly because of [XXX]. Data are available from the XXX Institutional Data Access / Ethics Committee (contact via XXX) for researchers who meet the criteria for access to confidential data.*

*The data underlying the results presented in the study are available from (include the name of the third party*

This study utilised the British STATS19 database, which contains data on all road traffic accidents in the United Kingdom. The data that support the findings of this study are openly available at <https://figshare.com/ndownloader/files/48173452>.



|                                                                                                                                                                                                                                         |                                                                                                                                                                                  |
|-----------------------------------------------------------------------------------------------------------------------------------------------------------------------------------------------------------------------------------------|----------------------------------------------------------------------------------------------------------------------------------------------------------------------------------|
| <p><i>and contact information or URL).</i></p> <ul style="list-style-type: none"><li>• This text is appropriate if the data are owned by a third party and authors do not have permission to share the data.</li></ul> <p>* typeset</p> |                                                                                                                                                                                  |
| Additional data availability information:                                                                                                                                                                                               | Tick here if the URLs/accession numbers/DOIs will be available only after acceptance of the manuscript for publication so that we can ensure their inclusion before publication. |



## 34 **Results**

35 Significant risk factors for overtaking crashes included speed limits of  $\geq 40$  miles per hour (mph)  
36 (AOR = 2.238, 95% CI = 2.159–2.320), heavy goods vehicles (HGVs) as crash partners (AOR = 2.867,  
37 95% CI 2.473–3.323), and elderly crash partners (AOR = 2.013, 95% CI = 1.937–2.092). For rear-  
38 end crashes, noteworthy risk factors included unlit darkness (AOR = 1.486, 95% CI = 1.404–1.573)  
39 and midnight hours (AOR = 1.269, 95% CI = 1.190–1.354). Factors associated with door crashes  
40 included speed limits of 20–30 mph (AOR = 16.185, 95% CI = 13.514–19.382) and taxi and private  
41 hire cars (AOR = 2.695, 95% CI = 2.310–3.145). Our joint-effect analysis revealed additional  
42 interesting results; for example, there were elevated risks for overtaking crashes in rural areas  
43 with elderly drivers as crash partners (AOR = 2.93, 95% CI = 2.79–3.08) and with HGVs as crash  
44 partners (AOR = 2.62, 95% CI = 2.46–2.78).

45

## 46 **Conclusions**

47 The aforementioned risk factors remained largely unchanged since 2011, when we conducted  
48 our previous study. However, the present study concluded that the detrimental effects of certain  
49 variables became more pronounced in certain situations. For example, cyclists in rural settings  
50 exhibited an elevated risk of overtaking crashes involving HGVs as crash partners.

51

52 **Keywords:** Bicycle crash; Road segment; Overtaking crash; Rear-end crash; Door crash

53

## 54 **Introduction**

55 In recent years, urban bicycling has become increasingly popular in many countries, offering

56 benefits such as reduced traffic congestion, diminished parking pressure, and a reduction in  
57 greenhouse gas emissions [1, 2]. The World Health Organization has highlighted numerous health  
58 advantages of moderate-intensity physical activities such as bicycling, including improvements in  
59 life expectancy, quality of life, cognitive function, mental health, sleep quality, muscular and  
60 cardiorespiratory fitness, and bone and functional health [2].

61 However, despite such health benefits, the risk of injury remains a considerable safety  
62 concern for cyclists, who are regarded as vulnerable road users [2, 3]. Traffic crash data indicate  
63 that the risk of accidents for cyclists, measured per distance travelled, is approximately 20 times  
64 higher than that for vehicle drivers [2]. To address this problem, researchers in the United States  
65 developed a comprehensive bicycle route safety rating model with a focus on injury severity [4].  
66 This model evaluates multiple operational and physical aspects such as traffic volume, population  
67 density, highway classification, lane width, and the presence of one-way streets. In addition, it is  
68 capable of predicting the severity of injuries due to motor vehicle–related crashes at specific  
69 locations [4]. Another finding was that a route is considered adequately safe if it includes  
70 geometric factors that enhance safety [4]. This model can aid urban planners and public officials  
71 in creating infrastructure such as bike lanes and implementing strict lane policies to improve  
72 cyclist safety [4]. Implementing bike lanes has been demonstrated to reduce crash rates by up to  
73 40% among adult cyclists [5]. One study regarding roundabouts indicated that roundabouts with  
74 cycle tracks significantly reduced injury risk for cyclists compared with those lacking bicycle  
75 infrastructure [6]. Furthermore, adequate night-time lighting on rural roads has the potential to  
76 prevent over half of all cyclist injuries [7].

77 Although intersectional crashes are generally more frequent than nonintersectional ones, in

78 2020, 64% of fatal crashes involving cyclists occurred on road segments, defined as areas 20 m  
79 away from intersections, whereas only 26% of such fatalities occurred at intersections [8]. Bil et  
80 al. demonstrated that car drivers, when at fault for crashes, often cause more serious  
81 consequences for cyclists on straight road sections [9]. In crashes occurring on road segments,  
82 several factors contribute to high injury severity, including being in a rural region with an elevated  
83 speed limit, male gender, and cyclist age of >55 years [10]. Another identified risk factor is  
84 bicycling on roads against oncoming traffic [11].

85 Although relevant research has shed light on risk factors for bicycle crashes at intersections,  
86 few studies have explicitly investigated crashes on road segments. Studies that have examined  
87 bicycle crashes relatively broadly, without distinguishing crash types, have identified several key  
88 factors—including vehicle volume [13], traffic density [12], number of lanes [12], access points  
89 along road segments [13], shoulder and median widths [13], parking space availability [12, 13],  
90 length of continuous two-way left-turn lanes [13], and pavement type [14]—all of which  
91 contribute to crashes on road segments. Several studies have specifically explored overtaking,  
92 rear-end, and door crashes involving bicycles. A pioneering contribution in this area was made  
93 by Pai, who focused on these three types of crashes on road segments [15]. Specifically, Pai  
94 identified buses and coaches as common crash partners in overtaking crashes; poor visibility,  
95 traversing manoeuvres, and teenage cyclists as risk factors for rear-end crashes; and built-up  
96 areas as a risk factor for door crashes [15]. In addition, another study linked the speed of a passing  
97 vehicle to increased severity of cyclist injury in overtaking crashes [16].

98 The primary objective of the present study, an extension of our previous study [15], was to  
99 analyse police-reported crash data from additional years to determine whether the risk factors

100 for these three crash types remained unchanged. Furthermore, we aimed to untangle the joint  
101 associations of several factors—including light conditions, urban versus rural settings, vehicle  
102 types, and rider and driver characteristics—with these three crash types.

103

## 104 **Material and Methods**

### 105 **Crash data source**

106 The present investigation utilised data from 01/01/1991 to 31/12/2020, obtained from the  
107 United Kingdom’s official road traffic casualty database, STATS19. Police record such data either  
108 at crash scenes or within 30 days of each crash. The UK’s Department for Transport compiles the  
109 data, which the United Kingdom Data Archive then maintains and distributes. The dataset  
110 encompasses a variety of variables, including crash circumstances (e.g., time and date, weather  
111 conditions, road and light conditions, posted speed limit, road type), vehicle and driver  
112 characteristics, demographic details of the drivers, precrash manoeuvres of the vehicles, and the  
113 initial impact point of the vehicle. Additionally, the dataset contains demographic information  
114 and details regarding injury severity for each casualty. This study adhered to the STROBE  
115 (strengthening the reporting of observational studies in epidemiology) reporting guidelines.

116 Injury severity in the aforementioned dataset is divided into three categories, namely slight,  
117 serious, and fatal. Fatal injuries refer to those leading to death within 30 days of the accident.  
118 Serious injuries include conditions such as fractures, internal injuries, severe cuts and lacerations,  
119 concussions, and any injury requiring hospitalisation. Slight injuries include sprains, bruises, and  
120 minor cuts, as well as mild shock requiring roadside attention. The exclusive focus of this study  
121 was crashes leading to cyclist casualties.

122 As shown in Figure 1, this study analysed 1,366,196 crashes involving bicycles and other  
 123 vehicles. Initially, 1,235,032 junction cases were excluded. From the remaining 131,164 bicycle  
 124 segment crashes, 3,527 were further excluded because of incomplete demographic data for the  
 125 cyclist and missing speed limit information, leaving a valid cohort of 127,637 bicycle segment  
 126 crashes for analysis. Within this cohort, this study identified 18,350 overtaking crashes, 44,962  
 127 rear-end crashes, 6,363 door crashes, and 57,962 other types of crashes.

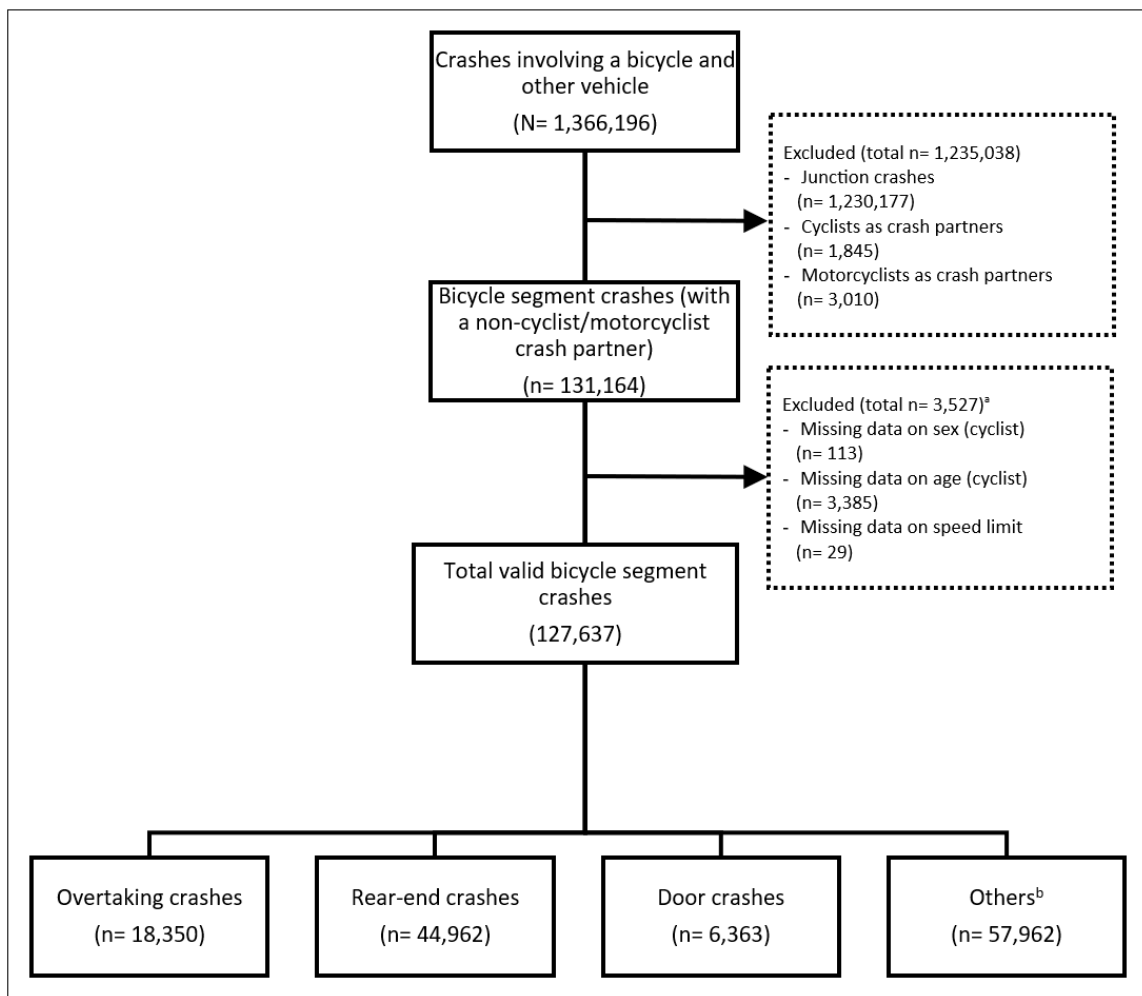

128  
 129 **Fig. 1.** Flowchart of the study sample selection process. <sup>a</sup>Listed excluded criteria are nonexclusive; thus, the sum of  
 130 the total may exceed 3,527. <sup>b</sup>Other crashes include reversing crashes and head-on crashes.

131  
 132 **Classification of crash types**

133 An overtaking crash is defined as a crash where a motorised vehicle overtakes and collides with



134 a bicycle, which may be travelling straight, overtaking another vehicle, changing lanes, or turning.  
135 A rear-end crash occurs when a following vehicle collides with the rear of a bicycle. A door crash  
136 involves a bicycle either being struck by or striking the opening door of an automobile. These  
137 three crash types were described using schematics in our previous study [15].

138

### 139 **Data collection**

140 For the present study, the three crash types of focus (overtaking, rear-end, and door crashes)  
141 were the binary-dependent variables. The collected data encompassed the following factors:  
142 lighting conditions on the roadway at the time of the crash (daylight, darkness-lit, darkness-unlit),  
143 the speed limit at the crash scene (rural:  $\geq 40$  miles per hour [mph]; urban: 20–30 mph), the time  
144 of day categorised into four periods according to traffic volume (midnight: 00:00–06:00; rush  
145 hours: 07:00–08:00 and 17:00–18:00; nonrush hours: 09:00–16:00; and evening: 19:00–23:00),  
146 and the day of the week (weekday or weekend day). The demographic details of cyclist casualties  
147 encompassed age ( $\leq 18$ , 19–40, 41–64, or  $\geq 65$  years) and sex (male or female). Finally, the  
148 demographic details of the crash partner included the type of vehicle (identified as a taxi, private  
149 hire car, car, bus, or heavy goods vehicle [HGV]), age ( $\leq 18$ , 19–40, 41–64, or  $\geq 65$  years) and sex  
150 (male or female).

151

### 152 **Statistical analysis**

153 This study employed the chi-squared test to examine the associations between crash type and  
154 other factors, including cyclist or motorist characteristics, vehicle features, roadway conditions,  
155 and temporal variables. Variables with a  $p$  value lower than 0.2 in the univariate analysis were

156 subsequently incorporated into the multivariate logistic regression analysis [17]. All statistical  
 157 analyses were conducted using SPSS Statistics version 25 for Windows (IBM Corp., Armonk, New  
 158 York, USA). A *p* value lower than 0.05 in two-tailed tests was considered statistically significant.

159

## 160 Results

### 161 Population characteristics

162 Tables 1, 2, and 3 present the distributions of overtaking, rear-end, and door crashes, respectively,  
 163 in relation to multiple independent variables. These data revealed that a significant proportion  
 164 of bicycle crashes occurred in daylight (82.31%), occurred in urban settings (78.54%), occurred  
 165 during nonrush hours (48.34%), occurred on weekdays (77.49%), involved cyclists aged under 18  
 166 years (40.11%), and involved male cyclists (81.30%). Additionally, most crashes involved cars as  
 167 crash partners (83.57%), and crash partners were predominately aged 19–40 years (38.47%) and  
 168 were male (76.35%). Table 1 highlights an overrepresentation in bicycle overtaking crashes for  
 169 certain variables, namely unlit darkness (19.50%), rural areas (24.84%), midnight hours (17.71%),  
 170 buses or HGVs as crash partners (24.72%), and elderly crash partners (21.47%) and male crash  
 171 partners (15.99%). These results were revealed to be statistically significant by the chi-squared  
 172 test ( $p < 0.01$ ).

173

174 **Table 1.** Distribution of overtaking crashes according to a set of independent variables

| Variable                       | Total<br>(n=127,637) | Overtaking<br>crashes<br>(n=18,350) | Non-overtaking<br>crashes<br>(n=109,287) | $\chi^2$ test<br><i>p</i> value |
|--------------------------------|----------------------|-------------------------------------|------------------------------------------|---------------------------------|
| <b>Light conditions, n (%)</b> |                      |                                     |                                          | <0.001                          |
| Daylight                       | 105,053 (82.31%)     | 15,283 (14.55%)                     | 89,770 (85.45%)                          |                                 |
| Darkness-lit                   | 16,543 (12.96%)      | 1,889 (11.42%)                      | 14,654 (88.58%)                          |                                 |
| Darkness-unlit                 | 6,041 (4.73%)        | 1,178 (19.50%)                      | 4,863 (80.50%)                           |                                 |

**Table 1.** Distribution of overtaking crashes according to a set of independent variables (*continued*)

| Variable                                  | Total<br>(n=127,637) | Overtaking<br>crashes<br>(n=18,350) | Non-overtaking<br>crashes<br>(n=109,287) | $\chi^2$ test<br>p value |
|-------------------------------------------|----------------------|-------------------------------------|------------------------------------------|--------------------------|
| <b>Speed limit, n (%)</b>                 |                      |                                     |                                          | <0.001                   |
| Rural ( $\geq$ 40 mph)                    | 27,395 (21.46%)      | 6,805 (24.84%)                      | 20,590 (75.61%)                          |                          |
| Urban (20–30 mph)                         | 100,242 (78.54%)     | 11,545 (11.52%)                     | 88,697 (88.48%)                          |                          |
| <b>Crash time (h), n (%)</b>              |                      |                                     |                                          | <0.001                   |
| Midnight (00:00–06:00)                    | 4,810 (3.77%)        | 852 (17.71%)                        | 3,958 (82.29%)                           |                          |
| Rush hours (07:00–08:00/17:00–18:00)      | 41,619 (32.61%)      | 5,685 (13.66%)                      | 35,934 (86.34%)                          |                          |
| Nonrush hours (09:00–16:00)               | 61,696 (48.34%)      | 9,386 (15.21%)                      | 52,310 (84.79%)                          |                          |
| Evening (19:00–23:00)                     | 19,512 (15.29%)      | 2,427 (12.44%)                      | 17,085 (87.56%)                          |                          |
| <b>Crash day, n (%)</b>                   |                      |                                     |                                          | 0.094                    |
| Weekend                                   | 28,730 (22.51%)      | 4,218 (14.68%)                      | 24,512 (85.21%)                          |                          |
| Weekday                                   | 98,907 (77.49%)      | 14,132 (14.29%)                     | 84,775 (85.71%)                          |                          |
| <b>Cyclist's age (years), n (%)</b>       |                      |                                     |                                          | <0.001                   |
| $\leq$ 18                                 | 51,193 (40.11%)      | 5,220 (10.20%)                      | 45,973 (89.80%)                          |                          |
| 19–40                                     | 45,760 (35.85%)      | 7,108 (15.53%)                      | 38,652 (84.47%)                          |                          |
| 41–64                                     | 26,052 (20.41%)      | 5,012 (19.24%)                      | 21,040 (80.76%)                          |                          |
| $\geq$ 65                                 | 4,632 (3.63%)        | 1,010 (21.80%)                      | 3,622 (78.20%)                           |                          |
| <b>Cyclist's sex, n (%)</b>               |                      |                                     |                                          | <0.001                   |
| Male                                      | 103,766 (81.30%)     | 14,746 (14.21%)                     | 89,020 (85.79%)                          |                          |
| Female                                    | 23,871 (18.70%)      | 3,604 (15.10%)                      | 20,267 (84.90%)                          |                          |
| <b>Crash partner, n (%)</b>               |                      |                                     |                                          | <0.001                   |
| Taxi/Private hire car                     | 2,588 (2.03%)        | 208 (8.04%)                         | 2,380 (91.96%)                           |                          |
| Car                                       | 106,668 (83.57%)     | 13,599 (12.75%)                     | 93,069 (87.25%)                          |                          |
| Bus/Heavy goods vehicle                   | 18,381 (14.40%)      | 4,543 (24.72%)                      | 13,838 (75.28%)                          |                          |
| <b>Crash partner's age (years), n (%)</b> |                      |                                     |                                          | <0.001                   |
| $\leq$ 18                                 | 2,415 (1.89%)        | 281 (11.64%)                        | 2,134 (88.36%)                           |                          |
| 19–40                                     | 49,103 (38.47%)      | 5,398 (10.99%)                      | 43,705 (89.01%)                          |                          |
| 41–64                                     | 35,598 (27.89%)      | 3,973 (11.16%)                      | 31,625 (88.84%)                          |                          |
| $\geq$ 65                                 | 40,521 (31.75%)      | 8,698 (21.47%)                      | 31,823 (78.53%)                          |                          |
| <b>Crash partner's sex, n (%)</b>         |                      |                                     |                                          | <0.001                   |
| Male                                      | 97,447 (76.35)       | 15,584 (15.99%)                     | 81,863 (84.01%)                          |                          |
| Female                                    | 30,190 (23.765%)     | 2,766 (9.16%)                       | 27,424 (90.84%)                          |                          |

175

176

177

178

179

180

181

182

As reported in Table 2, several variables, for instance, unlit darkness (50.19%), rural areas (43.03%), in midnight hours (47.59%), taxis as crash partners (42.35%), and elderly (39.67%) or male crash partners (36.77%) appeared to be disproportionately represented in bicycle rear-end crashes. These results were also revealed to be statistically significant by the chi-squared test ( $p < 0.01$ ).

**Table 2.** Distribution of rear-end crashes according to a set of independent variables

| Variable                       | Total<br>(n=127,637) | Rear-end<br>crashes<br>(n=44,962) | Non-rear-end<br>crashes<br>(n=82,675) | $\chi^2$ test<br>p value |
|--------------------------------|----------------------|-----------------------------------|---------------------------------------|--------------------------|
| <b>Light conditions, n (%)</b> |                      |                                   |                                       | <0.001                   |
| Daylight                       | 105,053 (82.31%)     | 35,726 (34.10%)                   | 69,333 (66.00%)                       |                          |
| Darkness-lit                   | 16,543 (12.96%)      | 6,204 (37.50%)                    | 10,339 (63.50%)                       |                          |
| Darkness-unlit                 | 6,041 (4.73%)        | 3,032 (50.19%)                    | 3,003 (49.71%)                        |                          |

**Table 2.** Distribution of rear-end crashes according to a set of independent variables (*continued*)

| Variable                                  | Total<br>(n=127,637) | Rear-end<br>crashes<br>(n=44,962) | Non-rear-end<br>crashes<br>(n=82,675) | $\chi^2$ test<br><i>p</i> value |
|-------------------------------------------|----------------------|-----------------------------------|---------------------------------------|---------------------------------|
| <b>Speed limit, n (%)</b>                 |                      |                                   |                                       | <0.001                          |
| Rural ( $\geq$ 40 mph)                    | 27,395 (21.46%)      | 11,788 (43.03%)                   | 15,607 (56.97%)                       |                                 |
| Urban (20–30 mph)                         | 100,242 (78.54%)     | 33,174 (33.09%)                   | 67,068 (66.91%)                       |                                 |
| <b>Crash time (h), n (%)</b>              |                      |                                   |                                       | <0.001                          |
| Midnight (00:00–06:00)                    | 4,810 (3.77%)        | 2,289 (47.59%)                    | 2,521 (52.41%)                        |                                 |
| Rush hours (07:00–08:00/17:00–18:00)      | 41,619 (32.61%)      | 15,089 (36.26%)                   | 26,530 (63.74%)                       |                                 |
| Nonrush hours (09:00–16:00)               | 61,696 (48.34%)      | 20,723 (33.59%)                   | 40,973 (66.41%)                       |                                 |
| Evening (19:00–23:00)                     | 19,512 (15.29%)      | 6,861 (36.16%)                    | 12,651 (64.85%)                       |                                 |
| <b>Crash day, n (%)</b>                   |                      |                                   |                                       | <0.001                          |
| Weekend                                   | 28,730 (22.51%)      | 9,485 (33.01%)                    | 19,245 (66.99%)                       |                                 |
| Weekday                                   | 98,907 (77.49%)      | 35,477 (35.87%)                   | 63,430 (64.13%)                       |                                 |
| <b>Cyclist's age (years), n (%)</b>       |                      |                                   |                                       | <0.001                          |
| $\leq$ 18                                 | 51,193 (40.11%)      | 13,446 (26.27%)                   | 37,747 (73.73%)                       |                                 |
| 19–40                                     | 45,760 (35.85%)      | 19,102 (41.74%)                   | 26,658 (58.26%)                       |                                 |
| 41–64                                     | 26,052 (20.41%)      | 10,619 (40.76%)                   | 15,433 (59.24%)                       |                                 |
| $\geq$ 65                                 | 4,632 (3.63%)        | 1,795 (38.75%)                    | 2,837 (61.25%)                        |                                 |
| <b>Cyclist's sex, n (%)</b>               |                      |                                   |                                       | <0.001                          |
| Male                                      | 103,766 (81.30%)     | 37,175 (35.83%)                   | 66,591 (64.17%)                       |                                 |
| Female                                    | 23,871 (18.70%)      | 7,787 (32.62%)                    | 16,084 (67.38%)                       |                                 |
| <b>Crash partner, n (%)</b>               |                      |                                   |                                       | <0.001                          |
| Taxi/Private hire car                     | 2,588 (2.03%)        | 1,096 (42.35%)                    | 1,492 (57.65%)                        |                                 |
| Car                                       | 106,668 (83.57%)     | 37,202 (34.88%)                   | 71,342 (66.88%)                       |                                 |
| Bus/Heavy goods vehicle                   | 18,381 (14.40%)      | 6,664 (36.25%)                    | 9,841 (53.54%)                        |                                 |
| <b>Crash partner's age (years), n (%)</b> |                      |                                   |                                       | <0.001                          |
| $\leq$ 18                                 | 2,415 (1.89%)        | 870 (36.02%)                      | 1,545 (63.98%)                        |                                 |
| 19–40                                     | 49,103 (38.47%)      | 16,282 (33.16%)                   | 32,821 (66.84%)                       |                                 |
| 41–64                                     | 35,598 (27.89%)      | 11,736 (32.97%)                   | 23,862 (67.03%)                       |                                 |
| $\geq$ 65                                 | 40,521 (31.75%)      | 16,074 (39.67%)                   | 24,447 (60.33%)                       |                                 |
| <b>Crash partner's sex, n (%)</b>         |                      |                                   |                                       | <0.001                          |
| Male                                      | 97,447 (76.35%)      | 35,828 (36.77%)                   | 61,619 (63.23%)                       |                                 |
| Female                                    | 30,190 (23.65%)      | 9,134 (30.26%)                    | 21,056 (69.74%)                       |                                 |

183

184 Table 3 demonstrates that cyclists in several conditions, such as in unlit darkness (6.23%), in

185 urban areas (6.22%), when they were female (8.21%), when taxi/private hire car were crash

186 partners (10.55%), and when crash partners were female (7.42%), exhibited a higher risk of door

187 crashes. These results were revealed to be statistically significant by the chi-squared test ( $p <$ 

188 0.01).

189

190

191

192

193 **Table 3.** Distribution of door crashes according to a set of independent variables

| Variable                                  | Total<br>(n=127,637) | Door crashes<br>(n=6,363) | Non-door<br>crashes<br>(n=121,274) | $\chi^2$ test<br>p value |
|-------------------------------------------|----------------------|---------------------------|------------------------------------|--------------------------|
| <b>Light conditions, n (%)</b>            |                      |                           |                                    | <0.001                   |
| Daylight                                  | 105,053 (82.31%)     | 5,192 (4.94%)             | 99,861 (95.06%)                    |                          |
| Darkness-lit                              | 16,543 (12.96%)      | 1,031 (6.23%)             | 15,512 (93.77%)                    |                          |
| Darkness-unlit                            | 6,041 (4.73%)        | 140 (2.32%)               | 5,901 (97.68%)                     |                          |
| <b>Speed limit, n (%)</b>                 |                      |                           |                                    | <0.001                   |
| Rural ( $\geq$ 40 mph)                    | 27,395 (21.46%)      | 123 (0.45%)               | 27,272 (99.55%)                    |                          |
| Urban (20–30 mph)                         | 100,242 (78.54%)     | 6,240 (6.22%)             | 94,002 (93.78%)                    |                          |
| <b>Crash time (h), n (%)</b>              |                      |                           |                                    | <0.001                   |
| Midnight (00:00–06:00)                    | 4,810 (3.77%)        | 113 (2.35%)               | 4,697 (97.65%)                     |                          |
| Rush hours (07:00–08:00/17:00–18:00)      | 41,619 (32.61%)      | 2,056 (4.94%)             | 39,563 (95.06%)                    |                          |
| Nonrush hours (09:00–16:00)               | 61,696 (48.34%)      | 3,363 (5.54%)             | 58,333 (94.55%)                    |                          |
| Evening (19:00–23:00)                     | 19,512 (15.29%)      | 831 (4.26%)               | 18,681 (95.74%)                    |                          |
| <b>Crash day, n (%)</b>                   |                      |                           |                                    | <0.001                   |
| Weekend                                   | 28,730 (22.51%)      | 1,072 (3.73%)             | 27,658 (96.27%)                    |                          |
| Weekday                                   | 98,907 (77.49%)      | 5,291 (5.35%)             | 93,616 (94.65%)                    |                          |
| <b>Cyclist's age (years), n (%)</b>       |                      |                           |                                    | <0.001                   |
| $\leq$ 18                                 | 51,193 (40.11%)      | 802 (1.57%)               | 50,391 (98.43%)                    |                          |
| 19–40                                     | 45,760 (35.85%)      | 3,474 (7.59%)             | 42,286 (93.41%)                    |                          |
| 41–64                                     | 26,052 (20.41%)      | 1,773 (6.81%)             | 24,279 (93.19%)                    |                          |
| $\geq$ 65                                 | 4,632 (3.63%)        | 314 (6.78%)               | 4,318 (93.22%)                     |                          |
| <b>Cyclist's sex, n (%)</b>               |                      |                           |                                    | <0.001                   |
| Male                                      | 103,766 (81.30%)     | 4,404 (4.24%)             | 99,362 (95.76%)                    |                          |
| Female                                    | 23,871 (18.70%)      | 1,959 (8.21%)             | 21,912 (91.79%)                    |                          |
| <b>Crash partner, n (%)</b>               |                      |                           |                                    | <0.001                   |
| Taxi/Private hire car                     | 2,588 (2.03%)        | 273 (10.55%)              | 2,315 (89.45%)                     |                          |
| Car                                       | 106,668 (83.57%)     | 5,514 (5.17%)             | 101,154 (94.83%)                   |                          |
| Bus/Heavy goods vehicle                   | 18,381 (14.40%)      | 576 (3.13%)               | 17,805 (96.87%)                    |                          |
| <b>Crash partner's age (years), n (%)</b> |                      |                           |                                    | <0.001                   |
| $\leq$ 18                                 | 2,415 (1.89%)        | 1,62 (5.22%)              | 2,253 (93.29%)                     |                          |
| 19–40                                     | 49,103 (38.47%)      | 2,585 (5.26%)             | 46,518 (94.74%)                    |                          |
| 41–64                                     | 35,598 (27.89%)      | 1,887 (5.30%)             | 33,711 (94.70%)                    |                          |
| $\geq$ 65                                 | 40,521 (31.75%)      | 1,729 (4.27%)             | 38,792 (95.73%)                    |                          |
| <b>Crash partner's sex, n (%)</b>         |                      |                           |                                    | <0.001                   |
| Male                                      | 97,447 (76.35%)      | 4,123 (4.23%)             | 93,324 (95.77%)                    |                          |
| Female                                    | 30,190 (23.65%)      | 2,240 (7.42%)             | 27,950 (92.58%)                    |                          |

194

195 **Risk factors for the three crash types**

196 Table 4 presents the logistic regression model results. Regarding overtaking crashes, the  
 197 identified risk factors included daylight conditions (adjusted odds ratio [AOR] = 1.233, 95%  
 198 confidence interval [CI] = 1.162–1.309), speed limits of  $\geq$ 40 mph (AOR = 2.238, 95% CI = 2.159–  
 199 2.320), nonrush hours (AOR = 1.091, 95% CI 1.031–1.154), cyclists aged  $\geq$ 65 years (AOR = 1.785,

200 95% CI = 1.649–1.931), female cyclists (AOR = 1.106, 95% CI = 1.062–1.153), HGVs as crash  
 201 partners (AOR = 2.867, 95% CI = 2.473–3.323), elderly crash partners (AOR = 2.013, 95% CI =  
 202 1.937–2.092), and male crash partners (AOR = 1.353, 95% CI = 1.292–1.416).

203 For rear-end crashes, noteworthy risk factors included unlit darkness (AOR = 1.486, 95% CI  
 204 = 1.404–1.573), speed limits of  $\geq 40$  mph (AOR = 1.315, 95% CI = 1.277–1.354), weekdays (AOR =  
 205 1.090, 95% CI = 1.059–1.122), midnight hours (AOR = 1.269, 95% CI = 1.190–1.354), and taxis as  
 206 crash partners (AOR = 1.286, 95% CI = 1.186–1.394).

207 Regarding door crashes, significant risk factors included lit darkness (AOR = 1.373, 95% CI =  
 208 1.141–1.651), speed limits of 20–30 mph (AOR = 16.185, 95% CI = 13.514–19.382), weekdays  
 209 (AOR = 1.246, 95% CI = 1.162–1.336), and nonrush hours (AOR = 2.912, 95% CI = 2.384–3.556).  
 210 Additionally, female cyclists (AOR = 1.675, 95% CI = 1.582–1.774), taxis or private hire cars as  
 211 crash partners (AOR = 2.695, 95% CI = 2.310–3.145), male crash partners (AOR = 1.373, 95% CI =  
 212 1.296–1.455), and crash partners aged 41–64 years (AOR = 1.855, 95% CI = 1.625–2.117) were  
 213 associated with door crashes.

214

215 **Table 4.** Multivariate logistic regression results

| Variable               | Overtaking crashes   |                | Rear-end crashes     |                | Door crashes            |                |
|------------------------|----------------------|----------------|----------------------|----------------|-------------------------|----------------|
|                        | AOR (95% CI)         | <i>p</i> value | AOR (95% CI)         | <i>P</i> value | AOR (95% CI)            | <i>P</i> value |
| <b>Light condition</b> |                      |                |                      |                |                         |                |
| Daylight               | 1.233 (1.162, 1.309) | <0.001         | Ref                  |                | 1.146 (0.958, 1.370)    | 0.137          |
| Darkness-lit           | Ref                  |                | 1.042 (1.002, 1.085) | 0.041          | 1.373 (1.141, 1.651)    | 0.001          |
| Darkness-unlit         | 1.152 (1.059, 1.253) | 0.001          | 1.486 (1.404, 1.573) | <0.001         | Ref                     |                |
| <b>Speed limit</b>     |                      |                |                      |                |                         |                |
| Rural ( $\geq 40$ mph) | 2.238 (2.159, 2.320) | <0.001         | 1.315 (1.277, 1.354) | <0.001         | Ref                     |                |
| Urban (20–30 mph)      | Ref                  |                | Ref                  |                | 16.185 (13.514, 19.382) | <0.001         |
| <b>Crash time</b>      |                      |                |                      |                |                         |                |
| Midnight               | 1.073 (0.982, 1.173) | 0.119          | 1.269 (1.190, 1.354) | <0.001         | Ref                     |                |
| Rush hours             | 1.059 (1.002, 1.120) | 0.043          | 1.108 (1.078, 1.139) | <0.001         | 2.502 (2.051, 3.052)    | <0.001         |
| Nonrush hours          | 1.091 (1.031, 1.154) | 0.003          | Ref                  |                | 2.912 (2.384, 3.556)    | <0.001         |
| Evening                | Ref                  |                | 0.992 (0.953, 1.032) | 0.686          | 2.014 (1.646, 2.465)    | <0.001         |

**Table 4.** Multivariate logistic regression results (*continued*)

| Variable                           | Overtaking crashes   |                | Rear-end crashes     |                | Door crashes         |                |
|------------------------------------|----------------------|----------------|----------------------|----------------|----------------------|----------------|
|                                    | AOR (95% CI)         | <i>p</i> value | AOR (95% CI)         | <i>p</i> value | AOR (95% CI)         | <i>p</i> value |
| <b>Crash day</b>                   |                      |                |                      |                |                      |                |
| Weekend                            | 1.031 (0.991, 1.072) | 0.132          | Ref                  |                | Ref                  |                |
| Weekday                            | Ref                  |                | 1.090 (1.059, 1.122) | <0.001         | 1.246 (1.162, 1.336) | <0.001         |
| <b>Cyclist's age (years)</b>       |                      |                |                      |                |                      |                |
| ≤18                                | Ref                  |                | Ref                  |                | Ref                  |                |
| 19–40                              | 1.292 (1.242, 1.345) | <0.001         | 1.839 (1.788, 1.891) | <0.001         | 5.943 (5.489, 6.435) | <0.001         |
| 41–64                              | 1.509 (1.444, 1.578) | <0.001         | 1.731 (1.676, 1.789) | <0.001         | 6.129 (5.621, 6.684) | <0.001         |
| ≥65                                | 1.785 (1.649, 1.931) | <0.001         | 1.671 (1.568, 1.780) | <0.001         | 5.988 (5.217, 6.874) | <0.001         |
| <b>Cyclist's sex</b>               |                      |                |                      |                |                      |                |
| Male                               | Ref                  |                | 1.172 (1.137, 1.208) | <0.001         | Ref                  |                |
| Female                             | 1.106 (1.062, 1.153) | <0.001         | Ref                  |                | 1.675 (1.582, 1.774) | <0.001         |
| <b>Crash partner</b>               |                      |                |                      |                |                      |                |
| Taxi/Private hire car              | Ref                  |                | 1.286 (1.186, 1.394) | <0.001         | 2.695 (2.310, 3.145) | <0.001         |
| Car                                | 1.571 (1.359, 1.816) | <0.001         | Ref                  |                | 2.089 (1.908, 2.286) | <0.001         |
| Bus/Heavy goods vehicle            | 2.867 (2.473, 3.323) | <0.001         | 1.099 (1.061, 1.139) | <0.001         | Ref                  |                |
| <b>Crash partner's age (years)</b> |                      |                |                      |                |                      |                |
| ≤18                                | 1.097 (0.963, 1.249) | 0.162          | 1.225 (1.188, 1.263) | <0.001         | 1.507 (1.313, 1.731) | <0.001         |
| 19–40                              | Ref                  |                | 1.038 (1.008, 1.069) | 0.013          | 1.855 (1.625, 2.117) | <0.001         |
| 41–64                              | 0.950 (0.909, 0.994) | 0.025          | Ref                  |                | 1.801 (1.574, 2.060) | <0.001         |
| ≥65                                | 2.013 (1.937, 2.092) | <0.001         | 1.241 (1.137, 1.355) | <0.001         | Ref                  |                |
| <b>Crash partner's sex</b>         |                      |                |                      |                |                      |                |
| Male                               | 1.353 (1.292, 1.416) | <0.001         | 1.150 (1.117, 1.185) | <0.001         | 1.373 (1.296, 1.455) | <0.001         |
| Female                             | Ref                  |                | Ref                  |                | Ref                  |                |

216

217 Figure 2 presents a forest plot demonstrating the joint effects of several variables on the

218 three crash types when other variables were controlled for. An elevated risk of overtaking crashes

219 was evident in rural areas with elderly drivers as crash partners (AOR = 2.93, 95% CI = 2.79–3.08),

220 HGVs as crash partners (AOR = 2.62, 95% CI = 2.46–2.78), and elderly cyclists involved in accidents

221 during weekends (AOR = 1.56, 95% CI = 1.34–1.81). The risk of rear-end crashes was increased by

222 the synergistic interaction of unlit darkness with midnight (AOR = 1.68, 95% CI = 1.48–1.90) and

223 by rural areas (AOR = 2.15, 95% CI = 2.01–2.31). Furthermore, bicycling at midnight in rural areas

224 was associated with an increased risk of rear-end crashes (AOR = 1.68; 95% CI = 1.51–1.86). In

225 urban settings, the risk of door crashes was higher for female cyclists (AOR = 2.29; 95% CI = 2.17–



226 2.43) and for elderly cyclists (AOR = 2.06; 95% CI = 1.82–2.34). Finally, female cyclists exhibited a  
 227 112% higher likelihood of door crashes when the crash partner was a taxi (AOR = 2.12; 95% CI =  
 228 1.68–2.69).

229

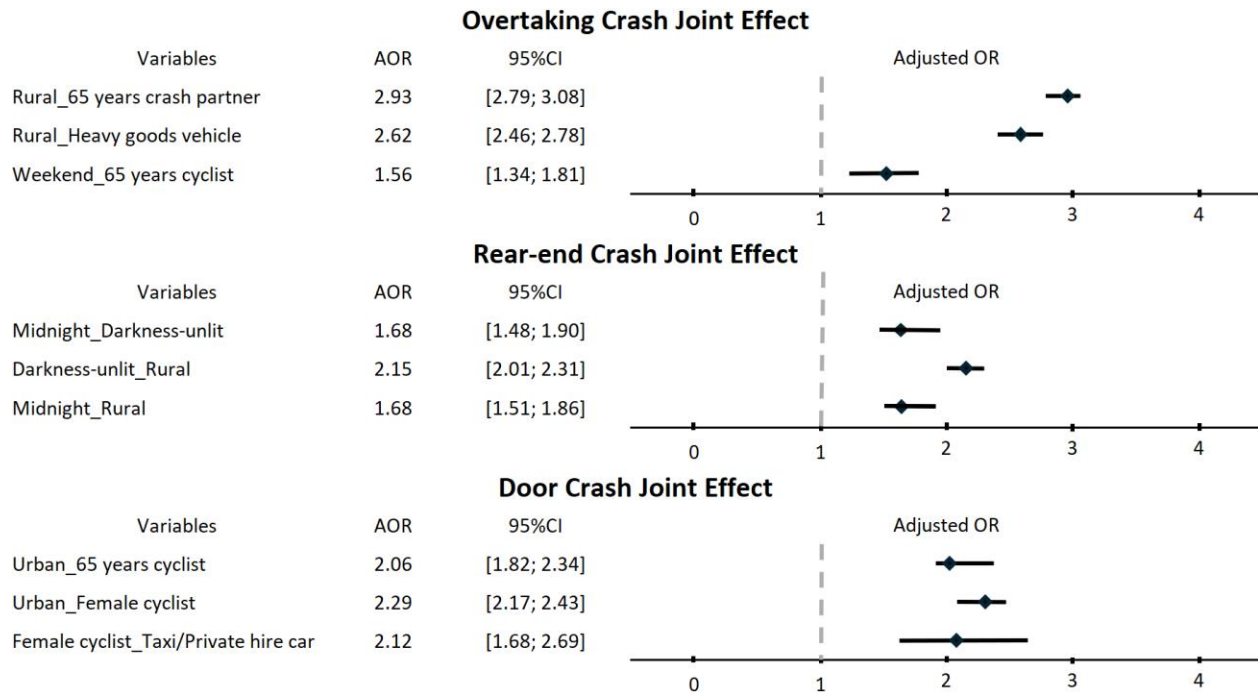

Fig. 2. Joint effects of several variables on the three crash types.

230  
 231  
 232

## 233 Discussion

234 This study explored the relationships among individual and environmental factors in relation to  
 235 three common bicycle crash types (overtaking, rear-end, and door crashes) on roads in the United  
 236 Kingdom from 1991 to 2020. The findings revealed several significant factors. First, for overtaking  
 237 crashes, HGVs as crash partners, rural areas, and the involvement of elderly crash partners  
 238 emerged as key contributing factors. Second, unlit darkness, midnight hours, and rural areas  
 239 were the factors most closely associated with rear-end crashes. Third, urban areas and taxis as  
 240 crash partners significantly increased the likelihood of door crashes. Moreover, male crash  
 241 partners were found to be a consistent risk factor across all three crash types. These findings

242 warrant further discussion and thus are elaborated on in this section of this paper.

243 Our research findings identified specific risk factors for overtaking crashes, namely rural  
244 areas, HGVs as crash partners, and elderly crash partners. These findings align with those of a  
245 previous study [18], which similarly observed that elderly drivers, driving speeds surpassing 10  
246 mph, and the presence of pick-up trucks increased the overtaking crash risk. We further found  
247 that the detrimental effect of HGVs on overtaking crashes was more pronounced in rural areas  
248 and when the crash partner was elderly. A behavioural study suggested that compared with cars,  
249 HGVs tended to maintain a narrower clearance zone when overtaking bicycles [19]. Pai et al. [15]  
250 speculated that the time pressures on HGV drivers for timely loading and unloading might lead  
251 to reckless driving. Our findings underscore the necessity of implementing measures such as  
252 ‘Share the Road’ warning signs [20], particularly in rural settings, where HGVs are likely to execute  
253 overtaking manoeuvres at high speed. Such measures could prompt motor vehicles to maintain  
254 safer distances from the edges of travel lanes, especially in areas with a notable presence of both  
255 HGVs and bicycles.

256 We also identified elderly drivers as a factor contributing to overtaking crashes—a finding  
257 consistent with relevant research [18]. As individuals age, their risk of being involved in road  
258 accidents is influenced by declines in their cognitive capabilities [21], their health [22], and their  
259 driving performance [23]. Notably, crashes involving elderly individuals often occur in scenarios  
260 with challenging conditions, including at intersections without traffic control measures, on high-  
261 speed roads, during adverse weather conditions, in poorly lit areas, and in head-on accidents  
262 [24–26]. The heightened level of risk under such conditions may be attributed to cognitive and  
263 perceptual decline in older drivers, which could affect their capacity to execute actions such as

264 overtaking manoeuvres safely. Accordingly, developing specialised cognitive training  
265 programmes as interventions to enhance road safety for elderly drivers is evidently necessary  
266 [27].

267 In the present study, several factors were found to increase the risk of rear-end crashes on  
268 road segments, including darkness with unlit surroundings, midnight hours, and rural settings  
269 (speed limit > 40 mph). Although few studies have specifically addressed rear-end crashes  
270 involving bicycles on road segments, available data suggest that the low conspicuity of bicycles,  
271 especially at night, is a recurrent factor in rear-end crashes [15, 28]. Moreover, a lack of adequate  
272 street lighting, which is common in rural settings, predisposes cyclists to rear-end crashes [15].  
273 Our joint-effects analysis further indicated that the detrimental effect of unlit darkness is more  
274 pronounced in rural areas and during midnight hours. Potential intervention strategies to  
275 mitigate rear-end crashes include enhancing illumination and executing speed control  
276 management on rural road segments with heavy bicycle traffic.

277 Next, our analysis successfully identified associations of urban areas and taxis and private  
278 hire cars as crash partners with door crashes on road segments. Although research specifically  
279 focusing on door crashes on road segments is limited, similar findings were documented by Pai,  
280 indicating that urban roadways and taxis contributed to door crashes [15]. However, determining  
281 the factors influencing this trend poses a challenge. One possible explanation could be the  
282 increased presence of taxis or private hire cars in such areas, where passengers often disembark.  
283 Additionally, our analysis further revealed an elevated risk of door crashes involving crashes with  
284 taxis in urban areas. To reduce door crashes on road segments, educating taxi drivers, as well as  
285 passengers, about the importance of vigilance when opening doors near traffic is essential [15].

286 In addition, cyclists should be advised to maintain at least a door's width distance from all parked  
287 cars to improve the sight triangles of drivers and increase the visibility of cyclists [29].  
288 Implementing a two-stage door opening mechanism for vehicles, which would enable drivers to  
289 verify the presence of bicycles to the rear, could also be beneficial [30].

290 This study had several limitations that warrant acknowledgement. First, the substantial  
291 underreporting of nonfatal casualties to the police, particularly casualties involving cyclists not  
292 obligated to report accidents, is a critical factor to consider. Such underreporting, as highlighted  
293 by the U.K. Government's Department for Transport [31], likely results in the incomplete  
294 representation of nonfatal and 'slight' casualties in road casualty data. Second, the STATS19 data  
295 utilised in this study lack critical variables, including precrash speeds, specific geometric  
296 characteristics of roadways, data regarding alcohol and illicit substance use, and cyclist speed at  
297 the time of an accident. Moreover, critical exposure data—such as those related to traffic flow,  
298 rider or driver experience, and other elements of risk exposure—are absent, and the absence of  
299 such details limits our ability to fully account for potential variations resulting from unobserved  
300 factors in the analyses. Finally, this study did not explore annual trends in each type of bicycle  
301 crash over the 30-year study period; investigating such trends could provide insights regarding  
302 changing behaviours among cyclists and motor vehicle drivers as well as the effects of legislative  
303 changes for road speed limits.

304

## 305 **Conclusions**

306 This study identified several significant risk factors for the three predominate types of crashes  
307 involving cyclists on road segments: HGVs as crash partners, elderly crash partners, and rural

308 areas for overtaking crashes; unlit darkness, midnight hours, and rural areas for rear-end crashes;  
309 and urban areas and taxis as crash partners for door crashes. These risk factors remained  
310 unchanged since our previous study conducted in 2011 [15]. The present research enhances the  
311 field of bicycle safety research by concluding that the detrimental effects of certain variables  
312 become more pronounced under certain conditions. For example, first, cyclists in rural settings  
313 exhibited an elevated risk of overtaking crashes involving HGVs. Second, the rear-end crash risk  
314 increases in the combined presence of unlit darkness, midnight hours, and rural areas. Finally, in  
315 urban settings, the likelihood of door crashes increases when a taxi is the crash partner.

316

### 317 **Abbreviations**

318 WHO: World Health Organization; HGVs: heavy goods vehicles; AOR: adjusted odds ratio; CI:  
319 confidence interval.

320

### 321 **Acknowledgments**

322 This manuscript was edited by Wallace Academic Editing.

323

### 324 **Author contributions**

325 **Literature review:** Chun-Chieh Chao.

326 **Methodology:** Chun-Chieh Chao, Chih-Wei Pai.

327 **Data merging and analysis:** Akhmad Fajri Widodo , Wafaa Saleh, Bayu Satria Wiratama.

328 **Writing - original draft:** Chun-Chieh Chao.

329 **Writing – review and editing:** Hui-An Lin, Chenyi Chen, Hon-Ping Ma, Akhmad Fajri Widodo.

330 **Validation:** Chun-Chieh Chao, Hui-An Lin, Chenyi Chen, Hon-Ping Ma, Shih Yu Ko.

331 **Supervision:** Li Wei, Yen-Nung Lin, Shou-Chien Hsu, Chih-Wei Pai.

332 **Funding:** Cheng-Wei Chan, Chih-Wei Pai.

333

### 334 **Funding**

335 This study received financial support from the Ministry of Science and Technology, Taiwan (MOST  
336 110–2410-H-038-016-MY2 and MOST 109–2314-B-038-066-); New Taipei City Hospital  
337 (NTPC113–002); and the National Science and Technology Council, Taiwan (NSTC 112-2410-H-  
338 038-016-MY2). The funders played no role in the design of the study, data collection and analysis,  
339 interpretation of data, or preparation of the manuscript.

340

### 341 **Availability of data and materials**

342 This study utilised the British STATS19 database, which contains data on all road traffic accidents  
343 in the United Kingdom. The data that support the findings of this study are openly available at  
344 <https://www.data.gov.uk/dataset/cb7ae6f0-4be6-4935-9277-47e5ce24a11f/road-safety-data>.

345

### 346 **Declarations**

#### 347 **Ethical approval and consent to participate**

348 This study was conducted in accordance with the Declaration of Helsinki and approved by the  
349 Joint Institutional Review Board of Taipei Medical University (N202011030).

350

351 **Consent for publication**

352 This study was approved by the Joint Institutional Review Board of Taipei Medical  
353 University (N202011030). The Joint Institutional Review Board of Taipei Medical University has  
354 waived the requirement of informed consent. All methods were performed in accordance with  
355 the relevant guidelines and regulations of the Declaration of Helsinki.

356

357 **Competing interests**

358 The authors declare that they have no competing interests in relation to this work.

359

360 **Author information**

361 <sup>1</sup>Graduate Institute of Injury Prevention and Control, College of Public Health, Taipei Medical  
362 University, Taipei City, Taiwan. <sup>2</sup>Department of Emergency Medicine, Taipei Medical University  
363 Hospital, Taipei City, Taiwan. <sup>3</sup>Department of Emergency Medicine, School of Medicine, College  
364 of Medicine, Taipei Medical University, Taipei City, Taiwan. <sup>4</sup>Department of Emergency Medicine,  
365 New Taipei City Hospital, New Taipei City, Taiwan. <sup>5</sup>College of Medicine, Chang Gung University,  
366 Taoyuan City, Taiwan. <sup>6</sup>Department of Emergency Medicine, Chang Gung Memorial Hospital,  
367 Linkou branch, Taoyuan, Taiwan. <sup>7</sup> Department of Emergency Medicine, Taipei Medical  
368 University-Shuang Ho Hospital, New Taipei City, Taiwan. <sup>8</sup>Taipei Neuroscience Institute, Taipei  
369 Medical University, Taipei City, Taiwan. <sup>9</sup>Division of Neurosurgery, Department of Surgery, Wan  
370 Fang Hospital, Taipei Medical University, Taipei City, Taiwan. <sup>10</sup>Department of Physical Medicine  
371 and Rehabilitation, Wan Fang Hospital, Taipei Medical University, Taipei City, Taiwan. <sup>11</sup>Transport  
372 Research Institute, Edinburgh Napier University, Edinburgh, Scotland. <sup>12</sup>Department of



373 Epidemiology, Biostatistics, and Population Health, Faculty of Medicine, Public Health and  
374 Nursing, Universitas Gadjah Mada, Yogyakarta City, Indonesia, <sup>13</sup>Department of Occupational  
375 Medicine, Chang Gung Memorial Hospital, Linkou branch, Taoyuan, Taiwan.

376 **References:**

377

- 378 1. Kjeldgard L, Ohlin M, Elrud R, Stigson H, Alexanderson K, Friberg E: Bicycle crashes and  
379 sickness absence - a population-based Swedish register study of all individuals of working  
380 ages. *BMC Public Health* 2019, *19*(1):943.
- 381 2. World Health Organization. Regional Office for E: Walking and cycling: latest evidence to  
382 support policy-making and practice. Copenhagen: World Health Organization. Regional  
383 Office for Europe; 2022,*1*.
- 384 3. Venkatraman V, Richard CM, Magee K, Johnson K: Countermeasures That Work: A  
385 Highway Safety Countermeasure Guide for State Highway Safety Offices, 10th Edition,  
386 2020. 2021(DOT HS 813 097).
- 387 4. Allen-Munley C, Daniel J, Dhar S: Logistic Model for Rating Urban Bicycle Route Safety.  
388 *Transportation Research Record* 2004, *1878*,*1*,:107-115.
- 389 5. Kaplan JA: Characteristics of the Regular Adult Bicycle User. Final Report; 1975.
- 390 6. Rivara FP, Thompson DC, Thompson RS: Epidemiology of bicycle injuries and risk factors  
391 for serious injury. *Inj Prev* 1997, *3*,*2*,:110-114.
- 392 7. Wanvik PO: Effects of road lighting: an analysis based on Dutch accident statistics 1987-  
393 2006. *Accid Anal Prev* 2009, *41*,*1*,:123-128.
- 394 8. Bicyclists and other cyclists: 2020 data (Traffic Safety Facts. Report No. DOT HS 813 322).  
395 In. <https://crashstats.nhtsa.dot.gov/Api/Public/ViewPublication/813322>: National  
396 Highway Traffic Safety Administration; 2022.
- 397 9. Bil M, Bilova M, Muller I: Critical factors in fatal collisions of adult cyclists with automobiles.  
398 *Accid Anal Prev* 2010, *42*,*6*,:1632-1636.
- 399 10. Moore DN, Schneider WHT, Savolainen PT, Farzaneh M: Mixed logit analysis of bicyclist  
400 injury severity resulting from motor vehicle crashes at intersection and non-intersection  
401 locations. *Accid Anal Prev* 2011, *43*,*3*,:621-630.
- 402 11. Wachtel A, Lewiston D: Risk factors for bicycle-motor vehicle collisions at intersections.  
403 *ITE journal* 1994, *64*,*9*,:30-35.
- 404 12. Meuleners LB, Fraser M, Johnson M, Stevenson M, Rose G, Oxley J. Characteristics of the  
405 road infrastructure and injurious cyclist crashes resulting in a hospitalisation. *Accid Anal*  
406 *Prev*. 2020;*136*:105407.
- 407 13. Ugan J, Abdel-Aty M, Cai Q, Mahmoud N, Al-Omari Me: Effect of Various Speed  
408 Management Strategies on Bicycle Crashes for Urban Roads in Central Florida.  
409 *Transportation Research Record: Journal of the Transportation Research Board* 2021,  
410 *2676*:036119812110366.
- 411 14. Robartes E, Chen TD: The effect of crash characteristics on cyclist injuries: An analysis of  
412 Virginia automobile-bicycle crash data. *Accid Anal Prev* 2017, *104*,*1*,:165-173.
- 413 15. Pai CW: Overtaking, rear-end, and door crashes involving bicycles: an empirical  
414 investigation. *Accid Anal Prev* 2011, *43*,*1*,:1228-1235.
- 415 16. Debnath AK, Haworth N, Schramm A, Heesch KC, Somoray K: Factors influencing  
416 noncompliance with bicycle passing distance laws. *Accid Anal Prev* 2018, *115*,*1*,:137-142.
- 417 17. Maldonado G, Greenland S: Simulation study of confounder-selection strategies. *Am J*  
418 *Epidemiol* 1993, *138*,*11*,:923-936.
- 419 18. Liu J, Jones S, Adanu EK, Li X: Behavioral pathways in bicycle-motor vehicle crashes: From

- 420 contributing factors, pre-crash actions, to injury severities. *J Safety Res* 2021, 77,1,:229-  
421 240.
- 422 19. Walker I: Signals are informative but slow down responses when drivers meet bicyclists  
423 at road junctions. *Accid Anal Prev* 2005, 37,6,:1074-1085.
- 424 20. Kay JJ, Savolainen PT, Gates TJ, Datta TK: Driver behavior during bicycle passing  
425 maneuvers in response to a Share the Road sign treatment. *Accid Anal Prev* 2014, 70:92-  
426 99.
- 427 21. Anstey KJ, Horswill MS, Wood JM, Hatherly C: The role of cognitive and visual abilities as  
428 predictors in the Multifactorial Model of Driving Safety. *Accid Anal Prev* 2012, 45:766-774.
- 429 22. Kandasamy D, Betz ME, DiGuseppi C, Mielenz TJ, Eby DW, Molnar LJ, Hill L, Strogatz D, Li  
430 G: Self-reported health conditions and related driving reduction in older drivers. *Occup  
431 Ther Health Care* 2018, 32,4,:363-379.
- 432 23. Laosee O, Rattanapan C, Somrongthong R: Physical and cognitive functions affecting road  
433 traffic injuries among senior drivers. *Arch Gerontol Geriatr* 2018, 78:160-164.
- 434 24. Cicchino JB, Wells JK, McCartt AT: Survey about pedestrian safety and attitudes toward  
435 automated traffic enforcement in Washington, D.C. *Traffic Inj Prev* 2014, 15(4):414-423.
- 436 25. Kostyniuk LP, Molnar LJ: Self-regulatory driving practices among older adults: health, age  
437 and sex effects. *Accid Anal Prev* 2008, 40,4,:1576-1580.
- 438 26. Zhang J, Lindsay J, Clarke K, Robbins G, Mao Y: Factors affecting the severity of motor  
439 vehicle traffic crashes involving elderly drivers in Ontario. *Accid Anal Prev* 2000, 32,1,:117-  
440 125.
- 441 27. Edwards JD, Ross LA, Wadley VG, Clay OJ, Crowe M, Roenker DL, Ball KK: The useful field  
442 of view test: normative data for older adults. *Arch Clin Neuropsychol* 2006, 21,4,:275-286.
- 443 28. Wood JM, Lacherez PF, Marszalek RP, King MJ: Drivers' and cyclists' experiences of sharing  
444 the road: incidents, attitudes and perceptions of visibility. *Accid Anal Prev* 2009,  
445 41,4,:772-776.
- 446 29. W.~Hunter W, Stewart JR: An Evaluation of Bike Lanes Adjacent to Motor Vehicle Parking.  
447 1999.
- 448 30. Huang C-Y: Observations of Drivers' Behavior when Opening Car Doors. *Procedia  
449 Manufacturing* 2015, 3:2753-2760.
- 450 31. Traffic Safety Facts - Bicyclists and Other Cyclists. In.  
451 <https://crashstats.nhtsa.dot.gov/Api/Public/ViewPublication/813322>: National Highway  
452 Traffic Safety Administration; 2020.

1 **Risk Factors for Overtaking, Rear-End, and Door Crashes Involving Bicycles in the United**  
2 **Kingdom: Revisited and Reanalysed**  
3

4 **Chun-Chieh Chao<sup>1,2,3†</sup>, Hon-Ping Ma<sup>1,3,7</sup>, Li Wei<sup>1,8,9</sup>, Yen-Nung Lin<sup>1,10</sup>, Chenyi Chen<sup>1</sup>, Wafaa Saleh<sup>11</sup>, Bayu Satria**  
5 **Wiratama<sup>12</sup>, Akhmad Fajri Widodo<sup>1</sup>, Shou-Chien Hsu<sup>6,13</sup>, Shih Yu Ko<sup>7</sup>, Hui-An Lin<sup>1,2,3†</sup>, Cheng-Wei Chan<sup>1,4,5,6†</sup>, Chih-**  
6 **Wei Pai<sup>1\*</sup>**

7 <sup>1</sup>Graduate Institute of Injury Prevention and Control, College of Public Health, Taipei Medical University, Taipei  
8 City, Taiwan, <sup>2</sup>Department of Emergency Medicine, Taipei Medical University Hospital, Taipei City, Taiwan, <sup>3</sup>  
9 Department of Emergency Medicine, School of Medicine, College of Medicine, Taipei Medical University, Taipei,  
10 Taiwan, <sup>4</sup>Department of Emergency Medicine, New Taipei City Hospital, New Taipei City, Taiwan, <sup>5</sup>College of  
11 Medicine, Chang Gung University, Taoyuan City, Taiwan, <sup>6</sup>Department of Emergency Medicine, Chang Gung  
12 Memorial Hospital, Linkou branch, Taoyuan, Taiwan, <sup>7</sup>Department of Emergency Medicine, Taipei Medical  
13 University-Shuang Ho Hospital, New Taipei City, Taiwan, <sup>8</sup>Taipei Neuroscience Institute, Taipei Medical University,  
14 Taipei, Taiwan, <sup>9</sup>Division of Neurosurgery, Department of Surgery, Wan Fang Hospital, Taipei Medical University,  
15 Taipei, Taiwan, <sup>10</sup>Department of Physical Medicine and Rehabilitation, Wan Fang Hospital, Taipei Medical  
16 University, Taipei, Taiwan, <sup>11</sup>Transport Research Institute, Edinburgh Napier University, Edinburgh, Scotland, <sup>12</sup>  
17 Department of Epidemiology, Biostatistics, and Population Health, Faculty of Medicine, Public Health and Nursing,  
18 Universitas Gadjah Mada, Yogyakarta City, Indonesia, <sup>13</sup>Department of Occupational Medicine, Chang Gung  
19 Memorial Hospital, Linkou branch, Taoyuan, Taiwan.

20 \* Correspondence: cpai@tmu.edu.tw

21 † Contributed equally to this work

## 22 **Abstract**

23 **Background:** Relevant research has provided valuable insights into risk factors for bicycle crashes  
24 at intersections. However, few studies have focused explicitly on three common types of bicycle  
25 crashes on road segments: overtaking, rear-end, and door crashes.

26 **Objective:** This study aims to identify risk factors for overtaking, rear-end, and door crashes that  
27 occur on road segment.

### 28 **Material and methods**

29 We analysed British STATS19 accident records from 1991 to 2020. Using multivariate logistic  
30 regression models, we estimated adjusted odds ratios (AORs) with 95% confidence intervals (CIs)  
31 for multiple risk factors. The analysis included 127,637 bicycle crashes, categorised into 18,350  
32 overtaking, 44,962 rear-end, 6,363 door, and 57,962 other crashes.

### 33 **Results**

34 Significant risk factors for overtaking crashes included speed limits of  $\geq 40$  miles per hour (mph)  
35 (AOR = 2.238, 95% CI = 2.159–2.320), heavy goods vehicles (HGVs) as crash partners (AOR = 2.867,  
36 95% CI 2.473–3.323), and elderly crash partners (AOR = 2.013, 95% CI = 1.937–2.092). For rear-  
37 end crashes, noteworthy risk factors included unlit darkness (AOR = 1.486, 95% CI = 1.404–1.573)  
38 and midnight hours (AOR = 1.269, 95% CI = 1.190–1.354). Factors associated with door crashes  
39 included speed limits of 20–30 mph (AOR = 16.185, 95% CI = 13.514–19.382) and taxi and private  
40 hire cars (AOR = 2.695, 95% CI = 2.310–3.145). Our joint-effect analysis revealed additional  
41 interesting results; for example, there were elevated risks for overtaking crashes in rural areas  
42 with elderly drivers as crash partners (AOR = 2.93, 95% CI = 2.79–3.08) and with HGVs as crash  
43 partners (AOR = 2.62, 95% CI = 2.46–2.78).

44

45 **Conclusions**

46 The aforementioned risk factors remained largely unchanged since 2011, when we conducted  
47 our previous study. However, the present study concluded that the detrimental effects of certain  
48 variables became more pronounced in certain situations. For example, cyclists in rural settings  
49 exhibited an elevated risk of overtaking crashes involving HGVs as crash partners.

50

51 **Keywords:** Bicycle crash; Road segment; Overtaking crash; Rear-end crash; Door crash

52

53

54 **Introduction**

55 In recent years, urban bicycling has become increasingly popular in many countries, offering  
56 benefits such as reduced traffic congestion, diminished parking pressure, and a reduction in  
57 greenhouse gas emissions [1, 2]. The World Health Organization has highlighted numerous health  
58 advantages of moderate-intensity physical activities such as bicycling, including improvements in  
59 life expectancy, quality of life, cognitive function, mental health, sleep quality, muscular and  
60 cardiorespiratory fitness, and bone and functional health [2].

61 However, despite such health benefits, the risk of injury remains a considerable safety  
62 concern for cyclists, who are regarded as vulnerable road users [2, 3]. Traffic crash data indicate  
63 that the risk of accidents for cyclists, measured per distance travelled, is approximately 20 times  
64 higher than that for vehicle drivers[2]. To address this problem, researchers in the United States  
65 developed a comprehensive bicycle route safety rating model with a focus on injury severity [4].

66 This model evaluates multiple operational and physical aspects such as traffic volume, population  
67 density, highway classification, lane width, and the presence of one-way streets. In addition, it is  
68 capable of predicting the severity of injuries due to motor vehicle–related crashes at specific  
69 locations [4]. Another finding was that a route is considered adequately safe if it includes  
70 geometric factors that enhance safety [4]. This model can aid urban planners and public officials  
71 in creating infrastructure such as bike lanes and implementing strict lane policies to improve  
72 cyclist safety [4]. Implementing bike lanes has been demonstrated to reduce crash rates by up to  
73 40% among adult cyclists [5]. One study regarding roundabouts indicated that roundabouts with  
74 cycle tracks significantly reduced injury risk for cyclists compared with those lacking bicycle  
75 infrastructure [6]. Furthermore, adequate night-time lighting on rural roads has the potential to  
76 prevent over half of all cyclist injuries [7]. Bicycle crashes can also impose a significant burden on  
77 healthcare expenses. Elvik and Sundfør [8] have discussed the economic implications and  
78 healthcare expenditures associated with bicycle accidents. For instance, in Belgium, the average  
79 cost of bicycle accidents per case is estimated at 841 euros [9]. In the Netherlands, the total  
80 annual cost has been reported as €410.7 million [10].

81 Although intersectional crashes are generally more frequent than nonintersectional ones, in  
82 2020, 64% of fatal crashes involving cyclists occurred on road segments, defined as areas 20 m  
83 away from intersections, whereas only 26% of such fatalities occurred at intersections [11]. Bil et  
84 al. demonstrated that car drivers, when at fault for crashes, often cause more serious  
85 consequences for cyclists on straight road sections [12]. In crashes occurring on road segments,  
86 several factors contribute to high injury severity, including being in a rural region with an elevated  
87 speed limit, male gender, and cyclist age of >55 years [13]. Another identified risk factor is

88 bicycling on roads against oncoming traffic [14].

89       Although relevant research has shed light on risk factors for bicycle crashes at intersections,  
90 few studies have explicitly investigated crashes on road segments. Bicycle crashes on road  
91 segments remain a substantial issue for public health concern. This study aims to fill a critical gap  
92 by conducting a thorough examination of the risk factors associated with three distinct bicycle  
93 crash types: overtaking, rear-end, and door crashes that occur on road segments. Studies that  
94 have examined bicycle crashes relatively broadly, without distinguishing crash types, have  
95 identified several key factors—including vehicle volume [15], traffic density [16], number of lanes  
96 [16], access points along road segments [15], shoulder and median widths [15], parking space  
97 availability [15, 16] , length of continuous two-way left-turn lanes [15], and pavement type [17]—  
98 all of which contribute to bicycle crashes on road segments. Two exceptional work have  
99 examined risk factors for overtaking, rear-end, and door crashes [18, 19]. Specifically, Pai  
100 identified buses and coaches as common crash partners in overtaking crashes, poor visibility,  
101 traversing manoeuvres, and teenage cyclists as risk factors for rear-end crashes, and built-up  
102 areas as a risk factor for door crashes [18]. In addition, another study linked the speed of a passing  
103 vehicle to increased severity of cyclist injury in overtaking crashes [19].

104       The primary objective of the present study, an extension of our previous study [18], was to  
105 analyse police-reported crash data from additional years to determine whether the risk factors  
106 for these three crash types remained unchanged. The study addresses a critical gap in current  
107 research, focusing on crashes specifically occurring on road segments. Existing literature offers  
108 limited insights into these crash types, highlighting a crucial need for targeted investigations.  
109 These crashes have the potential for severe impacts, involving complex dynamics that demand a



110 nuanced understanding for effective mitigation strategies. By exploring these factors, our  
111 research aims to significantly enhance cyclist safety within this particular context. Furthermore,  
112 we aimed to untangle the joint associations of several factors—including light conditions, urban  
113 versus rural settings, vehicle types, and rider and driver characteristics—with these three crash  
114 types.

115

## 116 **Material and Methods**

### 117 **Crash data source**

118 The present investigation utilised data from 01/01/1991 to 31/12/2020, obtained from the  
119 United Kingdom’s official road traffic casualty database, STATS19. Police record such data either  
120 at crash scenes or within 30 days of each crash. The UK’s Department for Transport compiles the  
121 data, which the United Kingdom Data Archive then maintains and distributes. The dataset  
122 encompasses a variety of variables, including crash circumstances (e.g., time and date, weather  
123 conditions, road and light conditions, posted speed limit, road type), vehicle and driver  
124 characteristics, demographic details of the drivers, precrash manoeuvres of the vehicles, and the  
125 initial impact point of the vehicle. Additionally, the dataset contains demographic information  
126 and details regarding injury severity for each casualty. This study adhered to the STROBE  
127 (strengthening the reporting of observational studies in epidemiology) reporting guidelines.[20]

128 Injury severity in the aforementioned dataset is divided into three categories, namely slight,  
129 serious, and fatal. Fatal injuries refer to those leading to death within 30 days of the accident.  
130 Serious injuries include conditions such as fractures, internal injuries, severe cuts and lacerations,  
131 concussions, and any injury requiring hospitalisation. Slight injuries include sprains, bruises, and

132 minor cuts, as well as mild shock requiring roadside attention. The exclusive focus of this study  
133 was crashes leading to cyclist casualties.

134 As shown in Figure 1, this study analysed 1,366,196 crashes involving bicycles and other  
135 vehicles. Initially, 1,235,032 junction cases were excluded. From the remaining 131,164 bicycle  
136 segment crashes, 3,527 were further excluded because of incomplete demographic data for the  
137 cyclist and missing speed limit information, leaving a valid cohort of 127,637 bicycle segment  
138 crashes for analysis. Within this cohort, this study identified 18,350 overtaking crashes, 44,962  
139 rear-end crashes, 6,363 door crashes, and 57,962 other types of crashes.

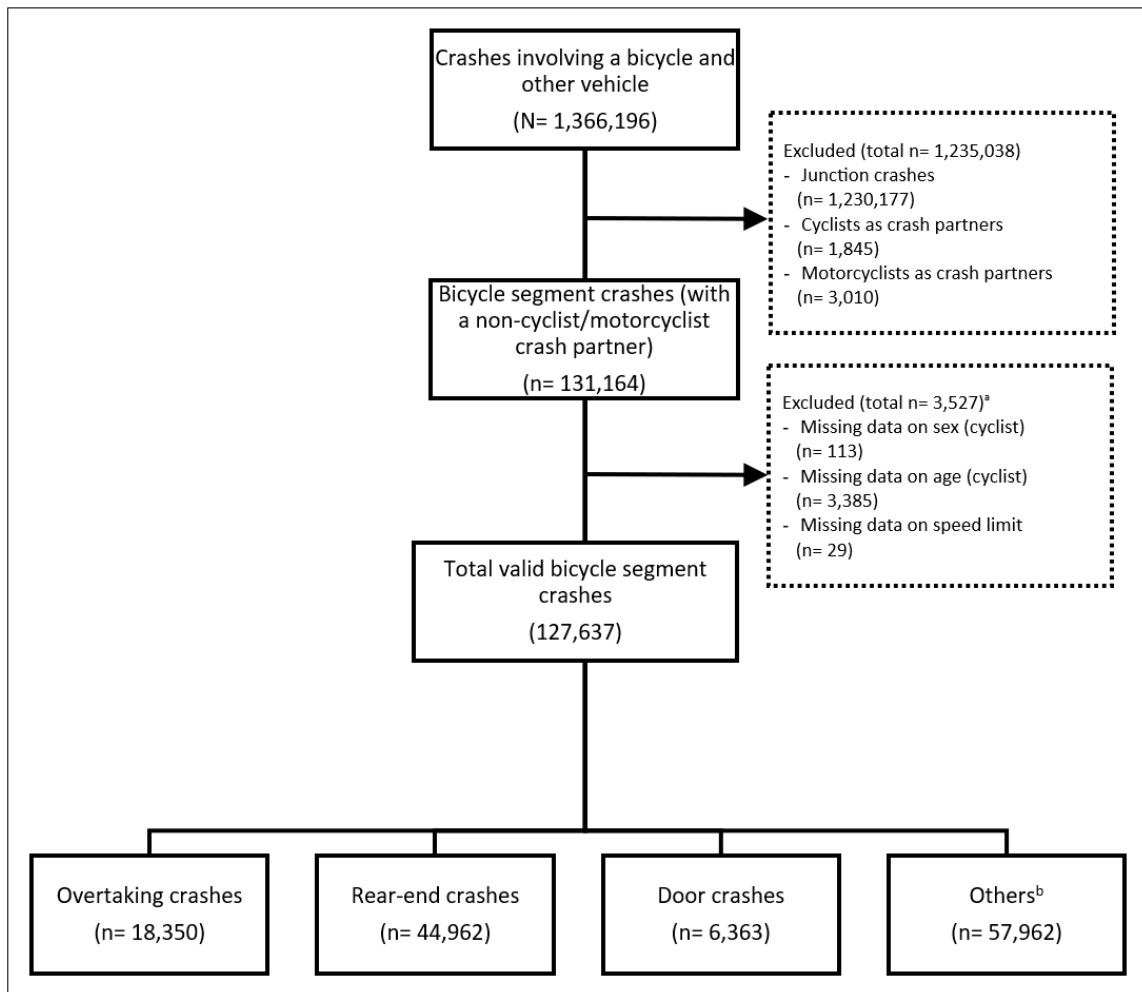

140

141 **Figure. 1.** Flowchart of the study sample selection process. <sup>a</sup>Listed excluded criteria are nonexclusive; thus, the  
142 sum of the total may exceed 3,527. <sup>b</sup>Other crashes include reversing crashes and head-on crashes.

143

144 **Classification of crash types**

145 As shown in Figure 2, an overtaking crash is defined as a crash where a motorised vehicle  
146 overtakes and impacts with a bicycle, which may be travelling straight, overtaking another vehicle,  
147 changing lanes, or turning. A rear-end crash occurs when a following vehicle impacts with the  
148 rear of a bicycle. A door crash involves a bicycle either being struck by or striking the opening  
149 door of an automobile. These three crash types were described using schematics in our previous  
150 study [18].

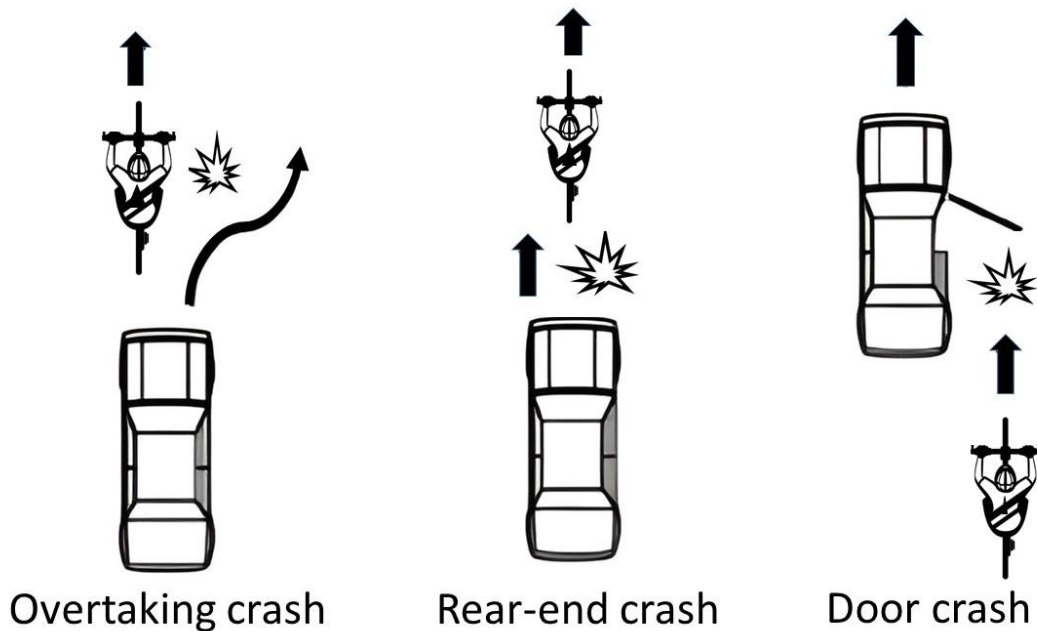

154 **Figure 2.** Illustrative diagram of the three crash types

155 **Data collection**

156 For the present study, the three crash types of focus (overtaking, rear-end, and door crashes)  
were the binary-dependent variables. The collected data encompassed the following factors:  
lighting conditions on the roadway at the time of the crash (daylight, darkness-lit, darkness-unlit),

157 the speed limit at the crash scene (rural:  $\geq 40$  miles per hour [mph]; urban: 20–30 mph), the time  
158 of day categorised into four periods according to traffic volume (midnight: 00:00–06:00; rush  
159 hours: 07:00–08:00 and 17:00–18:00; nonrush hours: 09:00–16:00; and evening: 19:00–23:00),  
160 and the day of the week (weekday or weekend day). The demographic details of cyclist casualties  
161 encompassed age ( $\leq 18$ , 19–40, 41–64, or  $\geq 65$  years) and sex (male or female). Finally, the  
162 demographic details of the crash partner included the type of vehicle (identified as a taxi, private  
163 hire car, car, bus, or heavy goods vehicle [HGV]), age ( $\leq 18$ , 19–40, 41–64, or  $\geq 65$  years) and sex  
164 (male or female). On a cautionary note, we removed junction cases to avoid the variability  
165 introduced when exogenous factors, such as junction geometry and control measures, are  
166 present at junctions. Furthermore, the cases involving other cyclists and motorcyclists were  
167 removed as we focused on vehicle-cycle crashes only. Missing data on sex, age, or speed limits  
168 were also excluded in the analysis. Excluding these data may impact our results in a marginal  
169 scale, as these data are likely to be single-bicycle crashes that in nature be underreported in  
170 police crash dataset [21].

171

## 172 **Statistical analysis**

173 This study employed the chi-squared test to examine the associations between crash type and  
174 other factors, including cyclist or motorist characteristics, vehicle features, roadway conditions,  
175 and temporal variables. Initially, we examined the distribution of three crash types across various  
176 variables to explore their relationships with a binary outcome. These variables included lighting  
177 conditions, speed limit, time of day, and day of the week. Demographic details concerning cyclist  
178 casualties encompassed age and sex, while information about the crash partner included vehicle

179 type, age, and sex. We set a significance level of  $p < 0.2$  to include risk factors in our multivariate  
180 analysis [23]. Adjusted odds ratios (AORs) were computed using multivariate logistic regression  
181 with backward selection.[22, 23]

182 The multivariate logistic regression model equation was specified as:

$$183 \quad \log \left( \frac{P(Y = 1)}{1 - P(Y = 1)} \right) = \beta_0 + \beta_1 X_1 + \beta_2 X_2$$

184 where  $P(Y = 1)$  denotes the probability of the outcome,  $\beta_0, \beta_1, \beta_2, \dots, \beta_p$  are the coefficients to be  
185 estimated, and  $X_1, X_2, \dots, X_p$  represent the predictor variables.

186 Before estimating the model, assumptions of logistic regression, such as linearity of the logit,  
187 absence of multicollinearity, and independence of observations, were evaluated. An odds ratio  
188 (OR) greater than 1 indicated a positive association between the independent variable and the  
189 occurrence rate, while an OR less than 1 indicated a negative association. An OR of 1 suggested  
190 no association between the variables of interest and the outcomes. All statistical analyses were  
191 conducted using SPSS Statistics version 25 for Windows (IBM Corp., Armonk, New York, USA). A  
192  $p$  value lower than 0.05 in two-tailed tests was considered statistically significant.

193

## 194 **Results**

### 195 **Population characteristics**

196 Tables 1, 2, and 3 present the distributions of overtaking, rear-end, and door crashes, respectively,  
197 in relation to multiple independent variables. These data revealed that a significant proportion

198 of bicycle crashes occurred in daylight (82.3%), occurred in urban settings (78.5%), occurred  
 199 during nonrush hours (48.3%), occurred on weekdays (77.5%), involved cyclists aged under 18  
 200 years (40.1%), and involved male cyclists (81.3%). Additionally, most crashes involved cars as  
 201 crash partners (83.6%), and crash partners were predominately aged 19–40 years (38.5%) and  
 202 were male (76.4%). Table 1 highlights an overrepresentation in bicycle overtaking crashes for  
 203 certain variables, namely unlit darkness (19.5%), rural areas (24.8%), midnight hours (17.7%),  
 204 buses or HGVs as crash partners (24.7%), and elderly crash partners (21.5%) and male crash  
 205 partners (16.0%). These results were revealed to be statistically significant by the chi-squared  
 206 test ( $p < 0.01$ ).

207

208 **Table 1.** Distribution of overtaking crashes according to a set of independent variables

| Variable                             | Total<br>(n=127,637) | Overtaking<br>crashes<br>(n=18,350) | Non-overtaking<br>crashes<br>(n=109,287) | $\chi^2$ test<br><i>p</i> value |
|--------------------------------------|----------------------|-------------------------------------|------------------------------------------|---------------------------------|
| <b>Light conditions, n (%)</b>       |                      |                                     |                                          | <0.001                          |
| Daylight                             | 105,053 (82.3%)      | 15,283 (14.55%)                     | 89,770 (85.5%)                           |                                 |
| Darkness-lit                         | 16,543 (13.0%)       | 1,889 (11.42%)                      | 14,654 (88.6%)                           |                                 |
| Darkness-unlit                       | 6,041 (4.7%)         | 1,178 (19.50%)                      | 4,863 (80.5%)                            |                                 |
| <b>Speed limit, n (%)</b>            |                      |                                     |                                          | <0.001                          |
| Rural ( $\geq 40$ mph)               | 27,395 (21.5%)       | 6,805 (24.8%)                       | 20,590 (75.6%)                           |                                 |
| Urban (20–30 mph)                    | 100,242 (78.5%)      | 11,545 (11.5%)                      | 88,697 (88.5%)                           |                                 |
| <b>Crash time (h), n (%)</b>         |                      |                                     |                                          | <0.001                          |
| Midnight (00:00–06:00)               | 4,810 (3.8%)         | 852 (17.7%)                         | 3,958 (82.3%)                            |                                 |
| Rush hours (07:00–08:00/17:00–18:00) | 41,619 (32.6%)       | 5,685 (13.7%)                       | 35,934 (86.3%)                           |                                 |
| Nonrush hours (09:00–16:00)          | 61,696 (48.3%)       | 9,386 (15.2%)                       | 52,310 (84.8%)                           |                                 |
| Evening (19:00–23:00)                | 19,512 (15.3%)       | 2,427 (12.4%)                       | 17,085 (87.6%)                           |                                 |
| <b>Crash day, n (%)</b>              |                      |                                     |                                          | 0.094                           |
| Weekend                              | 28,730 (22.5%)       | 4,218 (14.7%)                       | 24,512 (85.2%)                           |                                 |
| Weekday                              | 98,907 (77.5%)       | 14,132 (14.3%)                      | 84,775 (85.7%)                           |                                 |
| <b>Cyclist's age (years), n (%)</b>  |                      |                                     |                                          | <0.001                          |
| $\leq 18$                            | 51,193 (40.1%)       | 5,220 (10.2%)                       | 45,973 (89.8%)                           |                                 |
| 19–40                                | 45,760 (35.9%)       | 7,108 (15.5%)                       | 38,652 (84.5%)                           |                                 |
| 41–64                                | 26,052 (20.4%)       | 5,012 (19.2%)                       | 21,040 (80.8%)                           |                                 |
| $\geq 65$                            | 4,632 (3.6%)         | 1,010 (21.8%)                       | 3,622 (78.2%)                            |                                 |
| <b>Cyclist's sex, n (%)</b>          |                      |                                     |                                          | <0.001                          |
| Male                                 | 103,766 (81.3%)      | 14,746 (14.2%)                      | 89,020 (85.8%)                           |                                 |
| Female                               | 23,871 (18.7%)       | 3,604 (15.1%)                       | 20,267 (84.9%)                           |                                 |
| <b>Crash partner, n (%)</b>          |                      |                                     |                                          | <0.001                          |

|                                           |                 |                |                |        |
|-------------------------------------------|-----------------|----------------|----------------|--------|
| Taxi/Private hire car                     | 2,588 (2.0%)    | 208 (8.0%)     | 2,380 (92.0%)  |        |
| Car                                       | 106,668 (83.6%) | 13,599 (12.8%) | 93,069 (87.3%) |        |
| Bus/Heavy goods vehicle                   | 18,381 (14.4%)  | 4,543 (24.7%)  | 13,838 (75.3%) |        |
| <b>Crash partner's age (years), n (%)</b> |                 |                |                | <0.001 |
| ≤18                                       | 2,415 (1.9%)    | 281 (11.6%)    | 2,134 (88.4%)  |        |
| 19–40                                     | 49,103 (38.5%)  | 5,398 (11.0%)  | 43,705 (89.0%) |        |
| 41–64                                     | 35,598 (27.9%)  | 3,973 (11.2%)  | 31,625 (88.8%) |        |
| ≥65                                       | 40,521 (31.8%)  | 8,698 (21.5%)  | 31,823 (78.5%) |        |
| <b>Crash partner's sex, n (%)</b>         |                 |                |                | <0.001 |
| Male                                      | 97,447 (76.4%)  | 15,584 (16.0%) | 81,863 (84.0%) |        |
| Female                                    | 30,190 (23.8%)  | 2,766 (9.2%)   | 27,424 (90.8%) |        |

209

210 Several variables in Table 2 reveal significant differences between rear-end crashes and non-  
 211 rear-end crashes. Specifically, a higher proportion of rear-end crashes occurred under darkness-  
 212 unlit conditions (50.2%) compared to darkness-lit conditions (37.5%). Additionally, rear-end  
 213 crashes were more prevalent in rural areas with speed limits of ≥ 40 mph (43.0%) compared to  
 214 urban areas with speed limits of 20–30 mph (33.1%). Crashes involving crash partners aged ≥ 65  
 215 accounted for 39.7% of rear-end crashes, which was higher compared to other age groups (age  
 216 41–64: 33.0% and ≤18: 36.0%). Furthermore, rear-end crashes were more likely to occur during  
 217 midnight (47.6%) compared to rush hours (36.3%). Taxis were frequently involved in rear-end  
 218 crashes (42.4%), as were male crash partners (36.8%). These findings highlight the significant  
 219 influence of various factors on the likelihood of rear-end crashes. Variables such as darkness-unlit  
 220 conditions, higher speed limits in rural areas, crash time, and characteristics of the crash partner  
 221 all emerged as significant determinants. Specifically, rear-end crashes were notably more  
 222 prevalent under darkness-unlit conditions, in rural areas with higher speed limits, during  
 223 midnight hours, and involving certain characteristics of crash partners. Importantly, these  
 224 associations were statistically significant, as indicated by the Chi-squared test ( $p < 0.001$ ).

225

226 **Table 2.** Distribution of rear-end crashes according to a set of independent variables

| Variable                             | Total<br>(n=127,637) | Rear-end<br>crashes<br>(n=44,962) | Non-rear-end<br>crashes<br>(n=82,675) | $\chi^2$ test<br>p value |
|--------------------------------------|----------------------|-----------------------------------|---------------------------------------|--------------------------|
| <b>Light conditions, n (%)</b>       |                      |                                   |                                       | <0.001                   |
| Daylight                             | 105,053 (82.3%)      | 35,726 (34.1%)                    | 69,333 (66.0%)                        |                          |
| Darkness-lit                         | 16,543 (13.0%)       | 6,204 (37.5%)                     | 10,339 (63.5%)                        |                          |
| Darkness-unlit                       | 6,041 (4.73%)        | 3,032 (50.19%)                    | 3,003 (49.71%)                        |                          |
| <b>Speed limit, n (%)</b>            |                      |                                   |                                       | <0.001                   |
| Rural (≥ 40 mph)                     | 27,395 (21.5%)       | 11,788 (43.0%)                    | 15,607 (57.0%)                        |                          |
| Urban (20–30 mph)                    | 100,242 (78.5%)      | 33,174 (33.1%)                    | 67,068 (66.9%)                        |                          |
| <b>Crash time (h), n (%)</b>         |                      |                                   |                                       | <0.001                   |
| Midnight (00:00–06:00)               | 4,810 (3.8%)         | 2,289 (47.6%)                     | 2,521 (52.4%)                         |                          |
| Rush hours (07:00–08:00/17:00–18:00) | 41,619 (32.6%)       | 15,089 (36.3%)                    | 26,530 (63.7%)                        |                          |
| Nonrush hours (09:00–16:00)          | 61,696 (48.3%)       | 20,723 (33.6%)                    | 40,973 (66.4%)                        |                          |
| Evening (19:00–23:00)                | 19,512 (15.3%)       | 6,861 (36.2%)                     | 12,651 (64.9%)                        |                          |
| <b>Crash day, n (%)</b>              |                      |                                   |                                       | <0.001                   |
| Weekend                              | 28,730 (22.5%)       | 9,485 (33.0%)                     | 19,245 (67.0%)                        |                          |

|                                           |                 |                |                |        |
|-------------------------------------------|-----------------|----------------|----------------|--------|
| Weekday                                   | 98,907 (77.5%)  | 35,477 (35.9%) | 63,430 (64.1%) |        |
| <b>Cyclist's age (years), n (%)</b>       |                 |                |                | <0.001 |
| ≤18                                       | 51,193 (40.1%)  | 13,446 (26.3%) | 37,747 (73.7%) |        |
| 19–40                                     | 45,760 (35.9%)  | 19,102 (41.7%) | 26,658 (58.3%) |        |
| 41–64                                     | 26,052 (20.4%)  | 10,619 (40.8%) | 15,433 (59.2%) |        |
| ≥65                                       | 4,632 (3.6%)    | 1,795 (38.8%)  | 2,837 (61.3%)  |        |
| <b>Cyclist's sex, n (%)</b>               |                 |                |                | <0.001 |
| Male                                      | 103,766 (81.3%) | 37,175 (35.8%) | 66,591 (64.2%) |        |
| Female                                    | 23,871 (18.7%)  | 7,787 (32.6%)  | 16,084 (67.4%) |        |
| <b>Crash partner, n (%)</b>               |                 |                |                | <0.001 |
| Taxi/Private hire car                     | 2,588 (2.0%)    | 1,096 (42.4%)  | 1,492 (57.7%)  |        |
| Car                                       | 106,668 (83.6%) | 37,202 (34.9%) | 71,342 (66.9%) |        |
| Bus/Heavy goods vehicle                   | 18,381 (14.4%)  | 6,664 (36.3%)  | 9,841 (53.5%)  |        |
| <b>Crash partner's age (years), n (%)</b> |                 |                |                | <0.001 |
| ≤18                                       | 2,415 (1.9%)    | 870 (36.0%)    | 1,545 (64.0%)  |        |
| 19–40                                     | 49,103 (38.5%)  | 16,282 (33.2%) | 32,821 (66.8%) |        |
| 41–64                                     | 35,598 (27.9%)  | 11,736 (33.0%) | 23,862 (67.0%) |        |
| ≥65                                       | 40,521 (31.8%)  | 16,074 (40.0%) | 24,447 (60.3%) |        |
| <b>Crash partner's sex, n (%)</b>         |                 |                |                | <0.001 |
| Male                                      | 97,447 (76.6%)  | 35,828 (36.8%) | 61,619 (63.2%) |        |
| Female                                    | 30,190 (23.7%)  | 9,134 (30.3%)  | 21,056 (69.7%) |        |

227  
228 As shown in Table 3, several variables can contribute to door crashes involving bicycles. Door  
229 crashes predominantly occurred in urban areas with speed limits of 20-30 mph (6.2%), while a  
230 significantly lower proportion occurred in rural areas with speed limits ≥ 40 mph (0.5%). These  
231 crashes were overrepresented during non-rush hours (5.5%) and rush hours (4.9%) compared to  
232 evening (4.3%) and midnight (2.4%). Cyclists were more frequently involved in door crashes on  
233 weekdays (5.4%) than weekends (3.7%). As many as 8.2% of all female cyclists were involved in  
234 door crashes, which is higher than the involvement rate among males (4.2%). Taxi and private  
235 hire cars were overinvolved in door crashes (10.6%) compared to cars (5.2%) and buses/heavy  
236 goods vehicles (3.1%). Crash partners aged ≤18 years (5.2%) and 19-40 years (5.3%) were  
237 disproportionately involved in door crashes compared to older age groups, and female crash  
238 partners were overrepresented in door crashes (7.4%) compared to males (4.2%). These results  
239 were statistically significant, as indicated by the Chi-squared test ( $p < 0.001$ ). They suggest that  
240 various factors—including traffic conditions (rural areas, crash time), cyclist demographics



241 (younger age, gender), and characteristics of the crash partner (taxi/private hire cars)—  
 242 significantly contribute to the likelihood of door crashes involving cyclists.

243 **Table 3.** Distribution of door crashes according to a set of independent variables

| Variable                                  | Total<br>(n=127,637) | Door crashes<br>(n=6,363) | Non-door<br>crashes<br>(n=121,274) | $\chi^2$ test<br>p value |
|-------------------------------------------|----------------------|---------------------------|------------------------------------|--------------------------|
| <b>Light conditions, n (%)</b>            |                      |                           |                                    | <0.001                   |
| Daylight                                  | 105,053 (82.3%)      | 5,192 (4.9%)              | 99,861 (95.1%)                     |                          |
| Darkness-lit                              | 16,543 (13.0%)       | 1,031 (6.2%)              | 15,512 (93.8%)                     |                          |
| Darkness-unlit                            | 6,041 (4.7%)         | 140 (2.3%)                | 5,901 (97.7%)                      |                          |
| <b>Speed limit, n (%)</b>                 |                      |                           |                                    | <0.001                   |
| Rural ( $\geq$ 40 mph)                    | 27,395 (21.5%)       | 123 (0.5%)                | 27,272 (99.6%)                     |                          |
| Urban (20–30 mph)                         | 100,242 (78.5%)      | 6,240 (6.2%)              | 94,002 (93.8%)                     |                          |
| <b>Crash time (h), n (%)</b>              |                      |                           |                                    | <0.001                   |
| Midnight (00:00–06:00)                    | 4,810 (3.8%)         | 113 (2.4%)                | 4,697 (97.7%)                      |                          |
| Rush hours (07:00–08:00/17:00–18:00)      | 41,619 (32.6%)       | 2,056 (4.9%)              | 39,563 (95.1%)                     |                          |
| Nonrush hours (09:00–16:00)               | 61,696 (48.3%)       | 3,363 (5.5%)              | 58,333 (94.6%)                     |                          |
| Evening (19:00–23:00)                     | 19,512 (15.3%)       | 831 (4.3%)                | 18,681 (95.7%)                     |                          |
| <b>Crash day, n (%)</b>                   |                      |                           |                                    | <0.001                   |
| Weekend                                   | 28,730 (22.5%)       | 1,072 (3.7%)              | 27,658 (96.3%)                     |                          |
| Weekday                                   | 98,907 (77.5%)       | 5,291 (5.4%)              | 93,616 (94.7%)                     |                          |
| <b>Cyclist's age (years), n (%)</b>       |                      |                           |                                    | <0.001                   |
| $\leq$ 18                                 | 51,193 (40.1%)       | 802 (1.6%)                | 50,391 (98.4%)                     |                          |
| 19–40                                     | 45,760 (35.9%)       | 3,474 (7.6%)              | 42,286 (93.4%)                     |                          |
| 41–64                                     | 26,052 (20.4%)       | 1,773 (6.8%)              | 24,279 (93.2%)                     |                          |
| $\geq$ 65                                 | 4,632 (3.6%)         | 314 (6.8%)                | 4,318 (93.2%)                      |                          |
| <b>Cyclist's sex, n (%)</b>               |                      |                           |                                    | <0.001                   |
| Male                                      | 103,766 (81.3%)      | 4,404 (4.2%)              | 99,362 (95.8%)                     |                          |
| Female                                    | 23,871 (18.7%)       | 1,959 (8.2%)              | 21,912 (91.8%)                     |                          |
| <b>Crash partner, n (%)</b>               |                      |                           |                                    | <0.001                   |
| Taxi/Private hire car                     | 2,588 (2.0%)         | 273 (10.6%)               | 2,315 (89.5%)                      |                          |
| Car                                       | 106,668 (83.6%)      | 5,514 (5.2%)              | 101,154 (94.8%)                    |                          |
| Bus/Heavy goods vehicle                   | 18,381 (14.4%)       | 576 (3.1%)                | 17,805 (96.9%)                     |                          |
| <b>Crash partner's age (years), n (%)</b> |                      |                           |                                    | <0.001                   |
| $\leq$ 18                                 | 2,415 (1.9%)         | 1,62 (5.2%)               | 2,253 (93.3%)                      |                          |
| 19–40                                     | 49,103 (38.5%)       | 2,585 (5.3%)              | 46,518 (94.7%)                     |                          |
| 41–64                                     | 35,598 (27.9%)       | 1,887 (5.3%)              | 33,711 (94.7%)                     |                          |
| $\geq$ 65                                 | 40,521 (31.8%)       | 1,729 (4.3%)              | 38,792 (95.7%)                     |                          |
| <b>Crash partner's sex, n (%)</b>         |                      |                           |                                    | <0.001                   |
| Male                                      | 97,447 (76.6%)       | 4,123 (4.2%)              | 93,324 (95.8%)                     |                          |
| Female                                    | 30,190 (23.7%)       | 2,240 (7.4%)              | 27,950 (92.6%)                     |                          |

244

245

246 **Risk factors for the three crash types**

247 Table 4 presents the logistic regression model results. Regarding overtaking crashes, the

248 identified risk factors included daylight conditions (adjusted odds ratio [AOR] = 1.233, 95%

249 confidence interval [CI] = 1.162–1.309;  $p < 0.001$ ), speed limits of  $\geq 40$  mph (AOR = 2.238, 95% CI =  
250 2.159–2.320;  $p < 0.001$ ), nonrush hours (AOR = 1.091, 95% CI 1.031–1.154;  $p = 0.003$ ), cyclists aged  
251  $\geq 65$  years (AOR = 1.785, 95% CI = 1.649–1.931;  $p < 0.001$ ), female cyclists (AOR = 1.106, 95% CI =  
252 1.062–1.153), HGVs as crash partners (AOR = 2.867, 95% CI = 2.473–3.323;  $p < 0.001$ ), elderly crash  
253 partners (AOR = 2.013, 95% CI = 1.937–2.092;  $p < 0.001$ ), and male crash partners (AOR = 1.353,  
254 95% CI = 1.292–1.416;  $p < 0.001$ ).

255 For rear-end crashes, noteworthy risk factors included unlit darkness (AOR = 1.486, 95% CI  
256 = 1.404–1.573;  $p < 0.001$ ), speed limits of  $\geq 40$  mph (AOR = 1.315, 95% CI = 1.277–1.354;  $p < 0.001$ ),  
257 weekdays (AOR = 1.090, 95% CI = 1.059–1.122;  $p < 0.001$ ), midnight hours (AOR = 1.269, 95% CI =  
258 1.190–1.354;  $p < 0.001$ ), and taxis as crash partners (AOR = 1.286, 95% CI = 1.186–1.394;  $p < 0.001$ ).

259 Regarding door crashes, significant risk factors included lit darkness (AOR = 1.373, 95% CI =  
260 1.141–1.651;  $p < 0.001$ ), speed limits of 20–30 mph (AOR = 16.185, 95% CI = 13.514–19.382;  
261  $p < 0.001$ ), weekdays (AOR = 1.246, 95% CI = 1.162–1.336;  $p < 0.001$ ), and nonrush hours (AOR =  
262 2.912, 95% CI = 2.384–3.556;  $p < 0.001$ ). Additionally, female cyclists (AOR = 1.675, 95% CI = 1.582–  
263 1.774;  $p < 0.001$ ), taxis or private hire cars as crash partners (AOR = 2.695, 95% CI = 2.310–3.145;  
264  $p < 0.001$ ), male crash partners (AOR = 1.373, 95% CI = 1.296–1.455;  $p < 0.001$ ), and crash partners  
265 aged 41–64 years (AOR = 1.855, 95% CI = 1.625–2.117;  $p < 0.001$ ) were associated with door  
266 crashes.

267  
268  
269  
270  
271  
272  
273

274 **Table 4.** Multivariate logistic regression results

| Variable               | Overtaking crashes   |         | Rear-end crashes     |         | Door crashes            |         |
|------------------------|----------------------|---------|----------------------|---------|-------------------------|---------|
|                        | AOR (95% CI)         | p value | AOR (95% CI)         | p value | AOR (95% CI)            | p value |
| <b>Light condition</b> |                      |         |                      |         |                         |         |
| Daylight               | 1.233 (1.162, 1.309) | <0.001  | Ref                  |         | 1.146 (0.958, 1.370)    | 0.137   |
| Darkness-lit           | Ref                  |         | 1.042 (1.002, 1.085) | 0.041   | 1.373 (1.141, 1.651)    | 0.001   |
| Darkness-unlit         | 1.152 (1.059, 1.253) | 0.001   | 1.486 (1.404, 1.573) | <0.001  | Ref                     |         |
| <b>Speed limit</b>     |                      |         |                      |         |                         |         |
| Rural (≥40 mph)        | 2.238 (2.159, 2.320) | <0.001  | 1.315 (1.277, 1.354) | <0.001  | Ref                     |         |
| Urban (20–30 mph)      | Ref                  |         | Ref                  |         | 16.185 (13.514, 19.382) | <0.001  |
| <b>Crash time</b>      |                      |         |                      |         |                         |         |
| Midnight               | 1.073 (0.982, 1.173) | 0.119   | 1.269 (1.190, 1.354) | <0.001  | Ref                     |         |
| Rush hours             | 1.059 (1.002, 1.120) | 0.043   | 1.108 (1.078, 1.139) | <0.001  | 2.502 (2.051, 3.052)    | <0.001  |
| Nonrush hours          | 1.091 (1.031, 1.154) | 0.003   | Ref                  |         | 2.912 (2.384, 3.556)    | <0.001  |
| Evening                | Ref                  |         | 0.992 (0.953, 1.032) | 0.686   | 2.014 (1.646, 2.465)    | <0.001  |

**Table 4.** Multivariate logistic regression results (*continued*)

| Variable                           | Overtaking crashes   |         | Rear-end crashes     |         | Door crashes         |         |
|------------------------------------|----------------------|---------|----------------------|---------|----------------------|---------|
|                                    | AOR (95% CI)         | p value | AOR (95% CI)         | p value | AOR (95% CI)         | p value |
| <b>Crash day</b>                   |                      |         |                      |         |                      |         |
| Weekend                            | 1.031 (0.991, 1.072) | 0.132   | Ref                  |         | Ref                  |         |
| Weekday                            | Ref                  |         | 1.090 (1.059, 1.122) | <0.001  | 1.246 (1.162, 1.336) | <0.001  |
| <b>Cyclist's age (years)</b>       |                      |         |                      |         |                      |         |
| ≤18                                | Ref                  |         | Ref                  |         | Ref                  |         |
| 19–40                              | 1.292 (1.242, 1.345) | <0.001  | 1.839 (1.788, 1.891) | <0.001  | 5.943 (5.489, 6.435) | <0.001  |
| 41–64                              | 1.509 (1.444, 1.578) | <0.001  | 1.731 (1.676, 1.789) | <0.001  | 6.129 (5.621, 6.684) | <0.001  |
| ≥65                                | 1.785 (1.649, 1.931) | <0.001  | 1.671 (1.568, 1.780) | <0.001  | 5.988 (5.217, 6.874) | <0.001  |
| <b>Cyclist's sex</b>               |                      |         |                      |         |                      |         |
| Male                               | Ref                  |         | 1.172 (1.137, 1.208) | <0.001  | Ref                  |         |
| Female                             | 1.106 (1.062, 1.153) | <0.001  | Ref                  |         | 1.675 (1.582, 1.774) | <0.001  |
| <b>Crash partner</b>               |                      |         |                      |         |                      |         |
| Taxi/Private hire car              | Ref                  |         | 1.286 (1.186, 1.394) | <0.001  | 2.695 (2.310, 3.145) | <0.001  |
| Car                                | 1.571 (1.359, 1.816) | <0.001  | Ref                  |         | 2.089 (1.908, 2.286) | <0.001  |
| Bus/Heavy goods vehicle            | 2.867 (2.473, 3.323) | <0.001  | 1.099 (1.061, 1.139) | <0.001  | Ref                  |         |
| <b>Crash partner's age (years)</b> |                      |         |                      |         |                      |         |
| ≤18                                | 1.097 (0.963, 1.249) | 0.162   | 1.225 (1.188, 1.263) | <0.001  | 1.507 (1.313, 1.731) | <0.001  |
| 19–40                              | Ref                  |         | 1.038 (1.008, 1.069) | 0.013   | 1.855 (1.625, 2.117) | <0.001  |
| 41–64                              | 0.950 (0.909, 0.994) | 0.025   | Ref                  |         | 1.801 (1.574, 2.060) | <0.001  |
| ≥65                                | 2.013 (1.937, 2.092) | <0.001  | 1.241 (1.137, 1.355) | <0.001  | Ref                  |         |
| <b>Crash partner's sex</b>         |                      |         |                      |         |                      |         |
| Male                               | 1.353 (1.292, 1.416) | <0.001  | 1.150 (1.117, 1.185) | <0.001  | 1.373 (1.296, 1.455) | <0.001  |
| Female                             | Ref                  |         | Ref                  |         | Ref                  |         |

275

276 Figure 2 presents a forest plot demonstrating the joint effects of several variables on the

277 three crash types when other variables were controlled for. The results identified several key risk

278 factors for both overtaking and rear-end crashes. The risk of overtaking crashes showed a  
 279 significant increase of 193% in rural areas when elderly drivers were involved (AOR = 2.93, 95%  
 280 CI = 2.79–3.08), and similarly when heavy goods vehicles (HGVs) were the crash partner (AOR =  
 281 2.62, 95% CI = 2.46–2.78). Elderly cyclists also faced a higher risk of overtaking crashes on  
 282 weekends (AOR = 1.56, 95% CI = 1.34–1.81).

283 Regarding rear-end crashes, the risk increased notably with unlit darkness during  
 284 midnight (AOR = 1.68, 95% CI = 1.48–1.90) and was significantly higher in rural areas (AOR = 2.15,  
 285 95% CI = 2.01–2.31). Furthermore, bicycling at midnight in rural areas was associated with an  
 286 increased risk of rear-end crashes (AOR = 1.68; 95% CI = 1.51–1.86). In urban settings, the risk of  
 287 door crashes was higher for female cyclists (AOR = 2.29; 95% CI = 2.17–2.43) and for elderly  
 288 cyclists (AOR = 2.06; 95% CI = 1.82–2.34). Finally, female cyclists exhibited a 112% higher  
 289 likelihood of door crashes when the crash partner was a taxi (AOR = 2.12; 95% CI = 1.68–2.69).

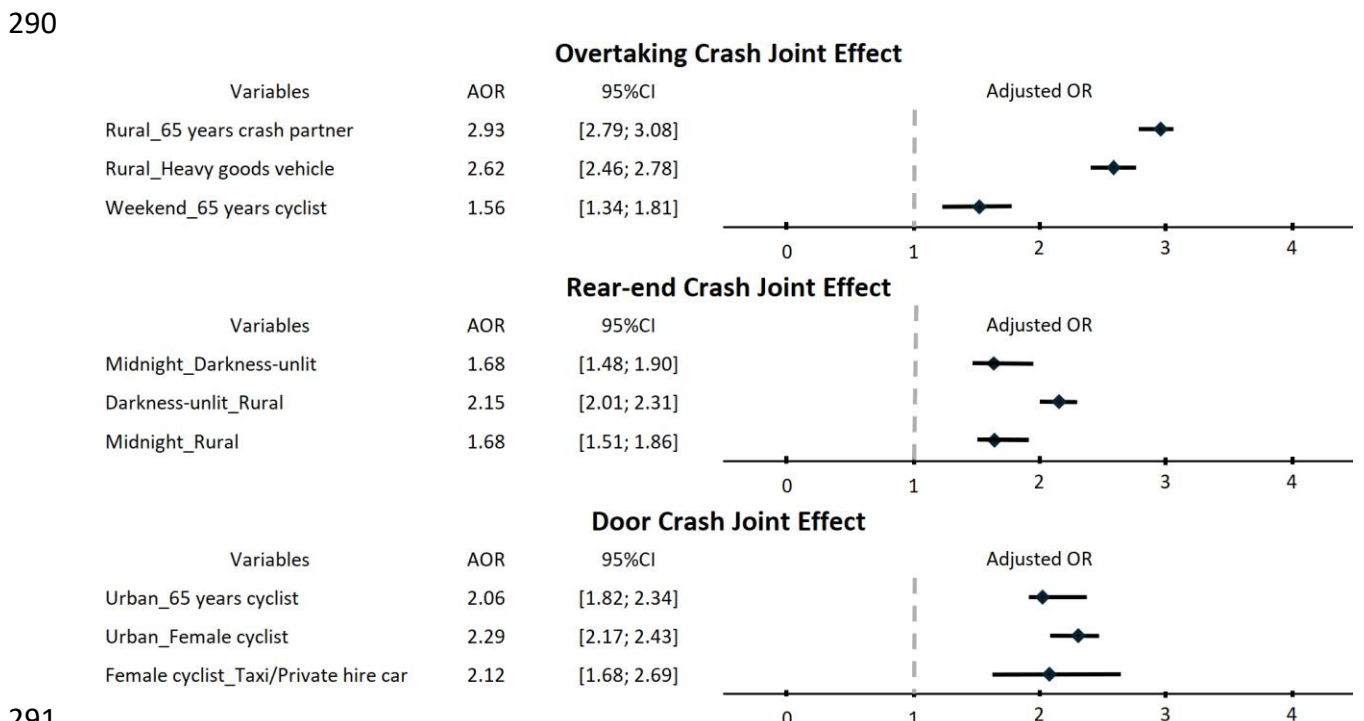

291 **Figure. 3.** Joint effects of several variables on the three crash types.  
 292

293  
294  
295  
296  
297

## **Discussion**

298 This study explored the relationships among individual and environmental factors in relation to  
299 three common bicycle crash types (overtaking, rear-end, and door crashes) on roads in the United  
300 Kingdom from 1991 to 2020. The findings revealed several significant factors. First, for overtaking  
301 crashes, HGVs as crash partners, rural areas, and the involvement of elderly crash partners  
302 emerged as key contributing factors. Second, unlit darkness, midnight hours, and rural areas  
303 were the factors most closely associated with rear-end crashes. Third, urban areas and taxis as  
304 crash partners significantly increased the likelihood of door crashes. Moreover, male crash  
305 partners were found to be a consistent risk factor across all three crash types.

306 Our research findings identified specific risk factors for overtaking crashes, namely rural  
307 areas, HGVs as crash partners, and elderly crash partners. These findings align with previous  
308 research that identified elderly drivers [24], speeds exceeding 10 mph, and the presence of pick-  
309 up trucks as factors contributing to increased risk for overtaking crash. Specifically, HGVs possess  
310 several characteristics that amplify this danger. Their large blind spots make it difficult for drivers  
311 to see cyclists, increasing the likelihood of crashes during overtaking. Additionally, HGVs are less  
312 manoeuvrable compared to passenger cars, which reduces their ability to avoid crashes if cyclists  
313 suddenly enter their path. The speed and distance perception issues between HGVs and cyclists  
314 further complicate the judgment of safe overtaking gaps. Furthermore, HGVs require longer  
315 stopping distances due to their size and weight, which can lead to severe consequences if a  
316 sudden need to brake arises. A behavioural study suggested that compared with cars, HGVs

317 tended to maintain a narrower clearance zone when overtaking bicycles [25]. Regarding the  
318 association with buses or HGVs, Pai et al. [18] suggested that time pressures on HGV drivers for  
319 timely loading and unloading might lead to more reckless driving. Specifically, our results align  
320 with the observations made by Pai et al., who also mentioned higher crash rates involving buses  
321 or HGVs, supporting the idea that these time pressures contribute to increased crash risks. Our  
322 findings underscore the necessity of implementing measures such as ‘Share the Road’ warning  
323 signs [26], particularly in rural settings, where HGVs are likely to execute overtaking manoeuvres  
324 at high speed. Such measures could prompt motor vehicles to maintain safer distances from the  
325 edges of travel lanes, especially in areas with a notable presence of both HGVs and bicycles.

326 We also identified elderly drivers as a factor contributing to overtaking crashes—a finding  
327 consistent with relevant research [24]. We found that as individuals age, their risk of being  
328 involved in road accidents increases, primarily due to declines in cognitive capabilities. Our study  
329 corroborates these findings by showing that older cyclists are more susceptible to accidents  
330 during overtaking manoeuvres, which can be attributed to diminished reaction times and  
331 impaired decision-making abilities [27], their health [28], and their driving performance [29].  
332 Notably, crashes involving elderly individuals often occur in scenarios with challenging conditions,  
333 including at intersections without traffic control measures, on high-speed roads, during adverse  
334 weather conditions, in poorly lit areas, and in head-on accidents [30-32]. The heightened level of  
335 risk under such conditions may be attributed to cognitive and perceptual decline in older drivers,  
336 which could affect their capacity to execute actions such as overtaking manoeuvres safely.  
337 Accordingly, developing specialised cognitive training programmes as interventions to enhance  
338 road safety for elderly drivers is evidently necessary [33]. Based on our study's findings, we

339 recommend the development of specialised interventions to improve road safety for elderly  
340 cyclists. Our analysis reveals that older cyclists are at a higher risk of being involved in overtaking  
341 crashes, with this increased risk being strongly linked to declines in cognitive capabilities  
342 associated with aging. To address this issue, we advocate for the implementation of targeted  
343 cognitive training programs specifically designed for elderly cyclists. These programs should focus  
344 on enhancing critical skills such as reaction time, situational awareness, and decision-making  
345 abilities, which are crucial for reducing crash risk and improving overall road safety.

346 In the present study, several factors were found to increase the risk of rear-end crashes on  
347 road segments, including darkness with unlit surroundings, midnight hours, and rural settings  
348 (speed limit > 40 mph). Although few studies have specifically addressed rear-end crashes  
349 involving bicycles on road segments, available data suggest that the low conspicuity of bicycles,  
350 especially at night, is a recurrent factor in rear-end crashes [18, 34]. Moreover, a lack of adequate  
351 street lighting, which is common in rural settings, predisposes cyclists to rear-end crashes [18].  
352 Our joint-effects analysis further indicated that the detrimental effect of unlit darkness is more  
353 pronounced in rural areas and during midnight hours. Potential intervention strategies to  
354 mitigate rear-end crashes include enhancing illumination and executing speed control  
355 management on rural road segments with heavy bicycle traffic.

356 Next, our analysis successfully identified associations of urban areas and taxis and private  
357 hire cars as crash partners with door crashes on road segments. Although research specifically  
358 focusing on door crashes on road segments is limited, similar findings were documented by Pai,  
359 indicating that urban roadways and taxis contributed to door crashes [18]. However, determining  
360 the factors influencing this trend poses a challenge. One possible explanation could be the

361 increased presence of taxis or private hire cars in such areas, where passengers often disembark.  
362 Additionally, our analysis further revealed an elevated risk of door crashes involving crashes with  
363 taxis in urban areas. To reduce door crashes on road segments, educating taxi drivers, as well as  
364 passengers, about the importance of vigilance when opening doors near traffic is essential [18].  
365 In addition, cyclists should be advised to maintain at least a door's width distance from all parked  
366 cars to improve the sight triangles of drivers and increase the visibility of cyclists [35].  
367 Implementing a two-stage door opening mechanism for vehicles, which would enable drivers to  
368 verify the presence of bicycles to the rear, could also be beneficial [36].

369 The strengths of this study include the use of STATS19 datasets spanning from 1991 to 2020,  
370 which provides a robust statistical foundation and a broad perspective on trends in bicycle  
371 crashes. By focusing specifically on three crash types on road segments—overtaking, rear-end,  
372 and door crashes—the study provides a comprehensive and focused analysis, which can yield  
373 more actionable insights and more effective recommendations. The UK-based dataset ensures  
374 that the findings are particularly relevant for local policy and safety interventions. Additionally,  
375 the application of statistical techniques and the consideration of various factors, such as crash  
376 partner and time of day, enhance the validity and depth of the analysis.

377 This study had several limitations that warrant acknowledgement. First, the substantial  
378 underreporting of nonfatal casualties to the police, particularly casualties involving cyclists not  
379 obligated to report accidents, is a critical factor to consider. Such underreporting, as highlighted  
380 by the U.K. Government's Department for Transport [11], likely results in the incomplete  
381 representation of nonfatal and 'slight' casualties in road casualty data. Second, the STATS19 data  
382 utilised in this study lack critical variables, including precrash speeds, specific geometric



383 characteristics of roadways, data regarding alcohol and illicit substance use, and cyclist speed at  
384 the time of an accident. Moreover, critical exposure data—such as those related to traffic flow,  
385 rider or driver experience, and other elements of risk exposure—are absent, and the absence of  
386 such details limits our ability to fully account for potential variations resulting from unobserved  
387 factors in the analyses. Finally, this study did not explore annual trends in each type of bicycle  
388 crash over the 30-year study period; investigating such trends could provide insights regarding  
389 changing behaviours among cyclists and motor vehicle drivers as well as the effects of legislative  
390 changes for road speed limits.

391 One inherent problem with police-reported crash data is the variables not readily available,  
392 hereby causing unobserved heterogeneity across the observations. To overcome such a  
393 limitation, we estimated separate regression models, as suggested by Kim et al.[37], for the three  
394 crash types; such an approach provides greater explanatory power compared to single overall  
395 models. Further, we conducted joint-effect analyses of several variables of interest that capture  
396 heterogeneity. In our previous studies, we adopted the above-mentioned approaches to  
397 overcome the inherent problem with a success [38, 39].

398 Future research directions could involve integrating GPS (Global Positioning System) data  
399 and weather conditions to analyse both injury frequency and fatalities of bicycle crashes on road  
400 segments. Additionally, exploring the potential of autonomous vehicles for detecting  
401 approaching bicycles for door-crashes and implementing AI-controlled lighting systems in rural  
402 areas for cyclist detection could be promising areas for further study.

403

404 **Recommendations**

405 For overtaking crashes, we recommend implementing 'Share the Road' warning signs,  
406 especially in rural areas, and developing specialized cognitive training programs for elderly  
407 drivers. Regarding rear-end crashes, our suggestions include improving illumination during night  
408 time and implementing speed control measures on rural road segments. For door crashes  
409 involving parked cars, we propose enhancing driver sight triangles and increasing cyclist visibility.  
410 Moreover, implementing a two-stage door opening mechanism and an automatic detection  
411 device in vehicles to alert drivers of bicycles approaching from behind could potentially be  
412 beneficial.

413

## 414 **Conclusions**

415 This study identified several significant risk factors for the three predominate types of crashes  
416 involving cyclists on road segments: HGVs as crash partners, elderly crash partners, and rural  
417 areas for overtaking crashes; unlit darkness, midnight hours, and rural areas for rear-end crashes;  
418 and urban areas and taxis as crash partners for door crashes. These risk factors remained  
419 unchanged since our previous study conducted in 2011 [15]. The present research enhances the  
420 field of bicycle safety research by concluding that the detrimental effects of certain variables  
421 become more pronounced under certain conditions. For example, first, cyclists in rural settings  
422 exhibited an elevated risk of overtaking crashes involving HGVs. Second, the rear-end crash risk  
423 increases in the combined presence of unlit darkness, midnight hours, and rural areas. Finally, in  
424 urban settings, the likelihood of door crashes increases when a taxi is the crash partner.

425

## 426 **Abbreviations**

427 WHO: World Health Organization; HGVs: heavy goods vehicles; AOR: adjusted odds ratio; CI:  
428 confidence interval.

429

### 430 **Acknowledgments**

431 This manuscript was edited by Wallace Academic Editing.

432

### 433 **Author contributions**

434 **Literature review:** Chun-Chieh Chao.

435 **Methodology:** Chun-Chieh Chao, Chih-Wei Pai.

436 **Data merging and analysis:** Akhmad Fajri Widodo, Wafaa Saleh, Bayu Satria Wiratama.

437 **Writing - original draft:** Chun-Chieh Chao.

438 **Writing – review and editing:** Hui-An Lin, Chenyi Chen, Hon-Ping Ma, Akhmad Fajri Widodo.

439 **Validation:** Chun-Chieh Chao, Hui-An Lin, Chenyi Chen, Hon-Ping Ma, Shih Yu Ko.

440 **Supervision:** Li Wei, Yen-Nung Lin, Shou-Chien Hsu, Chih-Wei Pai.

441 **Funding:** Cheng-Wei Chan, Chih-Wei Pai.

442

### 443 **Funding**

444 This study received financial support from the Ministry of Science and Technology, Taiwan (MOST  
445 110–2410-H-038-016-MY2 and MOST 109–2314-B-038-066-); New Taipei City Hospital  
446 (NTPC113–002); and the National Science and Technology Council, Taiwan (NSTC 112-2410-H-

447 038-016-MY2). The funders played no role in the design of the study, data collection and analysis,  
448 interpretation of data, or preparation of the manuscript.

449

#### 450 **Availability of data and materials**

451 This study utilised the British STATS19 database, which contains data on all road traffic accidents  
452 in the United Kingdom. The data that support the findings of this study are openly available at  
453 <https://figshare.com/ndownloader/files/48173452>.

454

#### 455 **Declarations**

##### 456 **Ethical approval and consent to participate**

457 This study was conducted in accordance with the Declaration of Helsinki and approved by the  
458 Joint Institutional Review Board of Taipei Medical University (N202011030).

459

##### 460 **Consent for publication**

461 This study was approved by the Joint Institutional Review Board of Taipei Medical  
462 University (N202011030). The Joint Institutional Review Board of Taipei Medical University has  
463 waived the requirement of informed consent. All methods were performed in accordance with  
464 the relevant guidelines and regulations of the Declaration of Helsinki.

465

##### 466 **Competing interests**

467 The authors declare that they have no competing interests in relation to this work.

468

469 **Author information**

470 <sup>1</sup>Graduate Institute of Injury Prevention and Control, College of Public Health, Taipei Medical  
471 University, Taipei City, Taiwan. <sup>2</sup>Department of Emergency Medicine, Taipei Medical University  
472 Hospital, Taipei City, Taiwan. <sup>3</sup>Department of Emergency Medicine, School of Medicine, College  
473 of Medicine, Taipei Medical University, Taipei City, Taiwan. <sup>4</sup>Department of Emergency Medicine,  
474 New Taipei City Hospital, New Taipei City, Taiwan. <sup>5</sup>College of Medicine, Chang Gung University,  
475 Taoyuan City, Taiwan. <sup>6</sup>Department of Emergency Medicine, Chang Gung Memorial Hospital,  
476 Linkou branch, Taoyuan, Taiwan. <sup>7</sup> Department of Emergency Medicine, Taipei Medical  
477 University-Shuang Ho Hospital, New Taipei City, Taiwan. <sup>8</sup>Taipei Neuroscience Institute, Taipei  
478 Medical University, Taipei City, Taiwan. <sup>9</sup>Division of Neurosurgery, Department of Surgery, Wan  
479 Fang Hospital, Taipei Medical University, Taipei City, Taiwan. <sup>10</sup>Department of Physical Medicine  
480 and Rehabilitation, Wan Fang Hospital, Taipei Medical University, Taipei City, Taiwan. <sup>11</sup>Transport  
481 Research Institute, Edinburgh Napier University, Edinburgh, Scotland. <sup>12</sup>Department of  
482 Epidemiology, Biostatistics, and Population Health, Faculty of Medicine, Public Health and  
483 Nursing, Universitas Gadjah Mada, Yogyakarta City, Indonesia, <sup>13</sup>Department of Occupational  
484 Medicine, Chang Gung Memorial Hospital, Linkou branch, Taoyuan, Taiwan.

485 **References:**

- 486 1. Kjeldgard L, Ohlin M, Elrud R, Stigson H, Alexanderson K, Friberg E. Bicycle crashes and  
487 sickness absence - a population-based Swedish register study of all individuals of working ages.  
488 BMC Public Health. 2019;19(1):943.
- 489 2. World Health Organization. Regional Office for E. Walking and cycling: latest evidence to  
490 support policy-making and practice. Copenhagen: World Health Organization. Regional Office for  
491 Europe; 2022.
- 492 3. Venkatraman V, Richard CM, Magee K, Johnson K. Countermeasures that work: A highway  
493 safety countermeasure guide for state highway safety offices, 10th Edition, 2020. (DOT HS 813  
494 097).
- 495 4. Allen-Munley C, Daniel J, Dhar S. Logistic model for rating urban bicycle route safety.  
496 Transportation Research Record. 2004;1878(1):107-15.
- 497 5. Kaplan JA. Characteristics of the Regular Adult Bicycle User. Final Report 1975.
- 498 6. Rivara FP, Thompson DC, Thompson RS. Epidemiology of bicycle injuries and risk factors  
499 for serious injury. Inj Prev. 1997;3(2):110-4.
- 500 7. Wanvik PO. Effects of road lighting: an analysis based on Dutch accident statistics 1987-  
501 2006. Accid Anal Prev. 2009;41(1):123-8.
- 502 8. Elvik R, Sundfør HB. How can cyclist injuries be included in health impact economic  
503 assessments? Journal of Transport & Health. 2017;6:29-39.
- 504 9. Aertsens J, de Geus B, Vandenbulcke G, Degraeuwe B, Broekx S, De Nocker L, et al.  
505 Commuting by bike in Belgium, the costs of minor accidents. Accident Analysis & Prevention.  
506 2010;42(6):2149-57.
- 507 10. Scholten AC, Polinder S, Panneman MJ, Van Beeck EF, Haagsma JA. Incidence and costs of  
508 bicycle-related traumatic brain injuries in the Netherlands. Accident Analysis & Prevention.  
509 2015;81:51-60.
- 510 11. Traffic Safety Facts - Bicyclists and Other Cyclists.  
511 <https://crashstats.nhtsa.dot.gov/Api/Public/ViewPublication/813322>: National Highway Traffic  
512 Safety Administration; 2020.
- 513 12. Bil M, Bilova M, Muller I. Critical factors in fatal collisions of adult cyclists with automobiles.  
514 Accid Anal Prev. 2010;42(6):1632-6.
- 515 13. Moore DN, Schneider WH, Savolainen PT, Farzaneh M. Mixed logit analysis of bicyclist  
516 injury severity resulting from motor vehicle crashes at intersection and non-intersection locations.  
517 Accid Anal Prev. 2011;43(3):621-30.
- 518 14. Wachtel A, Lewiston D. Risk factors for bicycle-motor vehicle collisions at intersections.  
519 ITE journal. 1994;64(9):30-5.
- 520 15. Ugan J, Abdel-Aty M, Cai Q, Mahmoud N, Al-Omari Me. Effect of various speed  
521 management strategies on bicycle crashes for urban roads in Central Florida. Transportation  
522 Research Record: Journal of the Transportation Research Board. 2021;2676:036119812110366.
- 523 16. Meuleners LB, Fraser M, Johnson M, Stevenson M, Rose G, Oxley J. Characteristics of the  
524 road infrastructure and injurious cyclist crashes resulting in a hospitalisation. Accident Analysis &  
525 Prevention. 2020;136:105407.
- 526 17. Robartes E, Chen T-D. The effect of crash characteristics on cyclist injuries: An analysis of  
527 Virginia automobile-bicycle crash data. Accid Anal Prev. 2017;104:165-73.

- 528 18. Pai C-W. Overtaking, rear-end, and door crashes involving bicycles: an empirical  
529 investigation. *Accid Anal Prev.* 2011;43(3):1228-35.
- 530 19. Debnath AK, Haworth N, Schramm A, Heesch KC, Somoray K. Factors influencing  
531 noncompliance with bicycle passing distance laws. *Accid Anal Prev.* 2018;115:137-42.
- 532 20. Vandembrouckel JP, von Elm E, Altman DG, Gotsche PC, Mulrow CD, Pocock SJ, et al.  
533 Strengthening the Reporting of Observational Studies in Epidemiology (STROBE): explanation and  
534 elaboration. *PLoS Medicine.* 2007;4(10):1628-55.
- 535 21. Watson A, Watson B, Vallmuur K. Estimating under-reporting of road crash injuries to  
536 police using multiple linked data collections. *Accident Analysis & Prevention.* 2015;83:18-25.
- 537 22. Maldonado G, Greenland S. Simulation study of confounder-selection strategies.  
538 *American Journal of Epidemiology.* 1993;138(11):923-36.
- 539 23. Chen P-L, Pai C-W. Evaluation of injuries sustained by motorcyclists in approach-turn  
540 crashes in Taiwan. *Accident Analysis & Prevention.* 2019;124:33-9.
- 541 24. Liu J, Jones S, Adanu EK, Li X. Behavioral pathways in bicycle-motor vehicle crashes: From  
542 contributing factors, pre-crash actions, to injury severities. *J Safety Res.* 2021;77:229-40.
- 543 25. Walker I. Signals are informative but slow down responses when drivers meet bicyclists  
544 at road junctions. *Accid Anal Prev.* 2005;37(6):1074-85.
- 545 26. Kay JJ, Savolainen PT, Gates TJ, Datta TK. Driver behavior during bicycle passing  
546 maneuvers in response to a Share the Road sign treatment. *Accid Anal Prev.* 2014;70:92-9.
- 547 27. Anstey KJ, Horswill MS, Wood JM, Hatherly C. The role of cognitive and visual abilities as  
548 predictors in the Multifactorial Model of Driving Safety. *Accid Anal Prev.* 2012;45:766-74.
- 549 28. Kandasamy D, Betz ME, DiGuseppi C, Mielenz TJ, Eby DW, Molnar LJ, et al. Self-reported  
550 health conditions and related driving reduction in older drivers. *Occup Ther Health Care.*  
551 2018;32(4):363-79.
- 552 29. Laosee O, Rattanapan C, Somrongthong R. Physical and cognitive functions affecting road  
553 traffic injuries among senior drivers. *Arch Gerontol Geriatr.* 2018;78:160-4.
- 554 30. Cicchino JB, Wells JK, McCartt AT. Survey about pedestrian safety and attitudes toward  
555 automated traffic enforcement in Washington, D.C. *Traffic Inj Prev.* 2014;15(4):414-23.
- 556 31. Kostyniuk LP, Molnar LJ. Self-regulatory driving practices among older adults: health, age  
557 and sex effects. *Accid Anal Prev.* 2008;40(4):1576-80.
- 558 32. Zhang J, Lindsay J, Clarke K, Robbins G, Mao Y. Factors affecting the severity of motor  
559 vehicle traffic crashes involving elderly drivers in Ontario. *Accid Anal Prev.* 2000;32(1):117-25.
- 560 33. Edwards JD, Ross LA, Wadley VG, Clay OJ, Crowe M, Roenker DL, et al. The useful field of  
561 view test: normative data for older adults. *Arch Clin Neuropsychol.* 2006;21(4):275-86.
- 562 34. Wood JM, Lacherez PF, Marszalek RP, King MJ. Drivers' and cyclists' experiences of sharing  
563 the road: incidents, attitudes and perceptions of visibility. *Accid Anal Prev.* 2009;41(4):772-6.
- 564 35. Hunter W, Stewart JR. An evaluation of bike lanes adjacent to motor vehicle parking. 1999.
- 565 36. Huang C-Y. Observations of drivers' behavior when opening car doors. *Procedia*  
566 *Manufacturing.* 2015;3:2753-60.
- 567 37. Kim D-G, Washington S, Oh J. Modeling crash types: New insights into the effects of  
568 covariates on crashes at rural intersections. *Journal of Transportation Engineering.*  
569 2006;132(4):282-92.
- 570 38. Pai C-W, Saleh W. Modelling motorcyclist injury severity by various crash types at T-  
571 junctions in the UK. *Safety Science.* 2008; 13:89-98.

572 39. Pai C-W, Jou R-C. Cyclists' red-light running behaviours: An examination of risk-taking,  
573 opportunistic, and law-obeying behaviours. *Accident Analysis & Prevention*. 2014;62:191-8.  
574



1 **Risk Factors for Overtaking, Rear-End, and Door Crashes Involving Bicycles in the United**  
2 **Kingdom: Revisited and Reanalysed**  
3

4 **Chun-Chieh Chao<sup>1,2,3†</sup>, Hon-Ping Ma<sup>1,3,7</sup>, Li Wei<sup>1,8,9</sup>, Yen-Nung Lin<sup>1,10</sup>, Chenyi Chen<sup>1</sup>, Wafaa Saleh<sup>11</sup>, Bayu Satria**  
5 **Wiratama<sup>12</sup>, Akhmad Fajri Widodo<sup>1</sup>, Shou-Chien Hsu<sup>6,13</sup>, Shih Yu Ko<sup>7</sup>, Hui-An Lin<sup>1,2,3†</sup>, Cheng-Wei Chan<sup>1,4,5,6†</sup>, Chih-**  
6 **Wei Pai<sup>1\*</sup>**

7 <sup>1</sup>Graduate Institute of Injury Prevention and Control, College of Public Health, Taipei Medical University, Taipei  
8 City, Taiwan, <sup>2</sup>Department of Emergency Medicine, Taipei Medical University Hospital, Taipei City, Taiwan, <sup>3</sup>  
9 Department of Emergency Medicine, School of Medicine, College of Medicine, Taipei Medical University, Taipei,  
10 Taiwan, <sup>4</sup>Department of Emergency Medicine, New Taipei City Hospital, New Taipei City, Taiwan, <sup>5</sup>College of  
11 Medicine, Chang Gung University, Taoyuan City, Taiwan, <sup>6</sup>Department of Emergency Medicine, Chang Gung  
12 Memorial Hospital, Linkou branch, Taoyuan, Taiwan, <sup>7</sup>Department of Emergency Medicine, Taipei Medical  
13 University-Shuang Ho Hospital, New Taipei City, Taiwan, <sup>8</sup>Taipei Neuroscience Institute, Taipei Medical University,  
14 Taipei, Taiwan, <sup>9</sup>Division of Neurosurgery, Department of Surgery, Wan Fang Hospital, Taipei Medical University,  
15 Taipei, Taiwan, <sup>10</sup>Department of Physical Medicine and Rehabilitation, Wan Fang Hospital, Taipei Medical  
16 University, Taipei, Taiwan, <sup>11</sup>Transport Research Institute, Edinburgh Napier University, Edinburgh, Scotland, <sup>12</sup>  
17 Department of Epidemiology, Biostatistics, and Population Health, Faculty of Medicine, Public Health and Nursing,  
18 Universitas Gadjah Mada, Yogyakarta City, Indonesia, <sup>13</sup>Department of Occupational Medicine, Chang Gung  
19 Memorial Hospital, Linkou branch, Taoyuan, Taiwan.

20 \* Correspondence: cpai@tmu.edu.tw

21 † Contributed equally to this work

## 22 **Abstract**

23 **Background and Objective:** Relevant research has provided valuable insights into risk factors for  
24 bicycle crashes at intersections. However, few studies have focused explicitly on three common  
25 types of bicycle crashes on road segments: overtaking, rear-end, and door crashes. This study  
26 aims to identify risk factors for overtaking, rear-end, and door crashes that occur on road  
27 segments.

## 28 **Material and methods**

29 We analysed British STATS19 accident records from 1991 to 2020. Using multivariate logistic  
30 regression models, we estimated adjusted odds ratios (AORs) with 95% confidence intervals (CIs)  
31 for multiple risk factors. The analysis included 127,637 bicycle crashes, categorised into 18,350  
32 overtaking, 44,962 rear-end, 6,363 door, and 57,962 other crashes.

## 33 **Results**

34 Significant risk factors for overtaking crashes included heavy goods vehicles (HGVs) as crash  
35 partners (AOR = 1.30, 95% CI 1.27–1.33), and elderly crash partners (AOR = 2.01, 95% CI = 1.94-  
36 2.09), and decreased risk in rural area with speed limits of 20-30 miles per hour (AOR = 0.45 ,  
37 95% CI =0.43-0.47). For rear-end crashes, noteworthy risk factors included unlit darkness (AOR =  
38 1.49, 95% CI = 1.40–1.57) and midnight hours (AOR = 1.28, 95% CI = 1.21–1.40). Factors  
39 associated with door crashes included urban areas (AOR = 16.2, 95% CI = 13.5–19.4) and taxi or  
40 private hire cars (AOR = 1.61, 95% CI =1.57–1.69). Our joint-effect analysis revealed additional  
41 interesting results; for example, there were elevated risks for overtaking crashes in rural areas  
42 with elderly drivers as crash partners (AOR = 2.93, 95% CI = 2.79–3.08) and with HGVs as crash  
43 partners (AOR = 2.62, 95% CI = 2.46–2.78).

44

45 **Conclusions**

46 The aforementioned risk factors remained largely unchanged since 2011, when we conducted  
47 our previous study. However, the present study concluded that the detrimental effects of certain  
48 variables became more pronounced in certain situations. For example, cyclists in rural settings  
49 exhibited an elevated risk of overtaking crashes involving HGVs as crash partners.

50

51 **Keywords:** Bicycle crash; Road segment; Overtaking crash; Rear-end crash; Door crash

52

53

54

55 **Introduction**

56 In recent years, urban bicycling has become increasingly popular in many countries, offering  
57 benefits such as reduced traffic congestion, diminished parking pressure, and a reduction in  
58 greenhouse gas emissions (1, 2). The World Health Organization has highlighted numerous health  
59 advantages of moderate-intensity physical activities such as bicycling, including improvements in  
60 life expectancy, quality of life, cognitive function, mental health, sleep quality, muscular and  
61 cardiorespiratory fitness, and bone and functional health (1).

62 However, despite such health benefits, the risk of injury remains a considerable safety  
63 concern for cyclists, who are regarded as vulnerable road users (1, 3). Traffic crash data indicate  
64 that the risk of accidents for cyclists, measured per distance travelled, is approximately 20 times  
65 higher than that for vehicle drivers(1). To address this problem, researchers in the United States

66 developed a comprehensive bicycle route safety rating model with a focus on injury severity (4).  
67 This model evaluates multiple operational and physical aspects such as traffic volume, population  
68 density, highway classification, lane width, and the presence of one-way streets. In addition, it is  
69 capable of predicting the severity of injuries due to motor vehicle–related crashes at specific  
70 locations (4). Another finding was that a route is considered adequately safe if it includes  
71 geometric factors that enhance safety (4). This model can aid urban planners and public officials  
72 in creating infrastructure such as bike lanes and implementing strict lane policies to improve  
73 cyclist safety (4). Implementing bike lanes has been demonstrated to reduce crash rates by up to  
74 40% among adult cyclists (5). One study found that roundabouts with dedicated cycle tracks  
75 significantly lower the risk of injury for cyclists compared to those without such bicycle  
76 infrastructure. (6). Furthermore, adequate night-time lighting on rural roads has the potential to  
77 prevent over half of all cyclist injuries (7). Bicycle crashes can also impose a significant burden on  
78 healthcare expenses. Elvik and Sundfør (8) have discussed the economic implications and  
79 healthcare expenditures associated with bicycle accidents. For instance, in Belgium, the average  
80 cost of bicycle accidents per case is estimated at 841 euros (9). In the Netherlands, the total  
81 annual cost has been reported as €410.7 million (10).

82 Although intersectional crashes are generally more frequent than non-intersectional ones, in  
83 2020, 64% of fatal crashes involving cyclists occurred on road segments, defined as areas 20  
84 meters away from intersections, whereas only 26% of such fatalities occurred at intersections  
85 (11). Bil et al. demonstrated that car drivers, when at fault for crashes, often cause more serious  
86 consequences for cyclists on straight road sections (12). In crashes occurring on road segments,  
87 several factors contribute to high injury severity, including being in a rural region with an elevated

88 speed limit, male gender, and cyclist age of >55 years (13). Another identified risk factor is  
89 bicycling on roads against oncoming traffic (14).

90 Although relevant research has shed light on risk factors for bicycle crashes at intersections,  
91 few studies have explicitly investigated crashes on road segments. Bicycle crashes on road  
92 segments remain a substantial issue for public health concern. This study aims to fill a critical gap  
93 by conducting a thorough examination of the risk factors associated with three distinct bicycle  
94 crash types: overtaking, rear-end, and door crashes that occur on road segments. Studies that  
95 have examined bicycle crashes relatively broadly, without distinguishing crash types, have  
96 identified several key factors—including vehicle volume (15), traffic density (16), number of lanes  
97 (16), access points along road segments (15), shoulder and median widths (15), parking space  
98 availability (15, 16) , length of continuous two-way left-turn lanes (15), and pavement type (17)—  
99 all of which contribute to bicycle crashes on road segments. One notable study has examined the  
100 risk factors for overtaking, rear-end, and door crashes (18). Specifically, Pai identified buses and  
101 coaches as common crash partners in overtaking crashes, poor visibility, traversing manoeuvres,  
102 and teenage cyclists as risk factors for rear-end crashes, and built-up areas as a risk factor for  
103 door crashes(18) . In addition, another study linked the speed of a passing vehicle to increased  
104 severity of cyclist injury in overtaking crashes (19). The high mortality rate from crashes on  
105 road segments underscores the significant risks linked to overtaking, rear-end, and door  
106 crashes. Overtaking, involving high-speed maneuvers, greatly increases the likelihood of  
107 severe accidents. Rear-end crashes, frequently triggered by sudden stops or aggressive  
108 tailgating, pose a persistent threat to cyclists. Furthermore, injuries sustained by cyclists  
109 striking an opening car door can be devastating due to the impacts from the door, ground, or

110 vehicles behind. These critical issues highlight the urgent need for identifying risk factors for  
111 these crashes.

112 The primary objective of the present study, an extension of our previous study, was to analyse  
113 police-reported crash data from additional years to determine whether the risk factors for these  
114 three crash types remained unchanged. The study addresses a critical gap in current research,  
115 focusing on crashes specifically occurring on road segments. Existing literature offers limited  
116 insights into these crash types, highlighting a crucial need for targeted investigations. These  
117 crashes have the potential for severe impacts, involving complex dynamics that demand a  
118 nuanced understanding for effective mitigation strategies. By exploring these factors, our  
119 research aims to significantly enhance cyclist safety within this particular context. Furthermore,  
120 we aimed to untangle the joint associations of several factors—including light conditions, urban  
121 versus rural settings, vehicle types, and rider and driver characteristics—with these three crash  
122 types.

123

## 124 **Material and Methods**

### 125 **Crash data source**

126 The present investigation utilised data from 01/01/1991 to 31/12/2020, obtained from the  
127 United Kingdom’s official road traffic casualty database, STATS19. Police record such data either  
128 at crash scenes or within 30 days of each crash. The UK’s Department for Transport compiles the  
129 data, which the United Kingdom Data Archive then maintains and distributes. The dataset  
130 encompasses a variety of variables, including crash circumstances (e.g., time and date, weather  
131 conditions, road and light conditions, posted speed limit, road type), vehicle and driver

132 characteristics, demographic details of the drivers, precrash manoeuvres of the vehicles, and the  
133 initial impact point of the vehicle. Additionally, the dataset contains demographic information  
134 and details regarding injury severity for each casualty. This study adhered to the STROBE  
135 (strengthening the reporting of observational studies in epidemiology) reporting guidelines.(20)  
136 The data that support the findings of this study are openly available at  
137 <https://figshare.com/ndownloader/files/48173452>.

138 Injury severity in the aforementioned dataset is divided into three categories, namely slight,  
139 serious, and fatal. Fatal injuries refer to those leading to death within 30 days of the accident.  
140 Serious injuries include conditions such as fractures, internal injuries, severe cuts and lacerations,  
141 concussions, and any injury requiring hospitalisation. Slight injuries include sprains, bruises, and  
142 minor cuts, as well as mild shock requiring roadside attention. The exclusive focus of this study  
143 was crashes leading to cyclist casualties.

144 As shown in Figure 1, this study analysed 1,366,196 crashes involving bicycles and other  
145 vehicles. Initially, 1,235,032 junction cases were excluded. From the remaining 131,164 bicycle  
146 segment crashes, 3,527 were further excluded because of incomplete demographic data for the  
147 cyclist and missing speed limit information, leaving a valid cohort of 127,637 bicycle segment  
148 crashes for analysis. Within this cohort, this study identified 18,350 overtaking crashes, 44,962  
149 rear-end crashes, 6,363 door crashes, and 57,962 other types of crashes.

150

151

## 152 **Classification of crash types**

153 As shown in Figure 2, an overtaking crash is defined as a crash where a motorised vehicle  
154 overtakes and impacts with a bicycle, which may be travelling straight, overtaking another vehicle,

155 changing lanes, or turning. A rear-end crash occurs when a following vehicle impacts with the  
156 rear of a bicycle. A door crash involves a bicycle either being struck by or striking the opening  
157 door of an automobile. These three crash types were described using schematics in our previous  
158 study(18) .

159

## 160 **Data analysis**

161 For the present study, the three crash types of focus (overtaking, rear-end, and door crashes)  
162 were the binary-dependent variables. The collected data encompassed the following factors:  
163 lighting conditions on the roadway at the time of the crash (daylight, darkness-lit, darkness-unlit),  
164 the speed limit at the crash scene (rural:  $\geq 40$  miles per hour [mph]; urban: 20–30 mph), the time  
165 of day categorised into four periods according to traffic volume (midnight: 00:00–06:00; rush  
166 hours: 07:00–08:00 and 17:00–18:00; nonrush hours: 09:00–16:00; and evening: 19:00–23:00),  
167 and the day of the week (weekday or weekend day). The demographic details of cyclist casualties  
168 encompassed age ( $\leq 18$ , 19–40, 41–64, or  $\geq 65$  years) and sex (male or female). Finally, the  
169 demographic details of the crash partner included the type of vehicle (identified as a taxi, private  
170 hire car, car, bus, or heavy goods vehicle [HGV]), age ( $\leq 18$ , 19–40, 41–64, or  $\geq 65$  years) and sex  
171 (male or female). On a cautionary note, we removed junction cases to avoid the variability  
172 introduced when exogenous factors, such as junction geometry and control measures, are  
173 present at junctions. Furthermore, the cases involving other cyclists and motorcyclists were  
174 removed as we focused on vehicle-cycle crashes only. Missing data on sex, age, or speed limits  
175 were also excluded in the analysis. Excluding these data may impact our results in a marginal  
176 scale, as these data are likely to be single-bicycle crashes that in nature be underreported in



177 police crash dataset (21).

178

## 179 **Statistical analysis**

180 This study employed the Chi-squared test to examine the associations between crash type and  
181 other factors, including cyclist or motorist characteristics, vehicle features, roadway conditions,  
182 and temporal variables. We initially utilized descriptive statistics to examine the distribution of  
183 crash types across various variables such as lighting conditions, speed limit, time of day, and day  
184 of the week. Demographic details concerning cyclist casualties encompassed age and sex, while  
185 information about the crash partner included vehicle type, age, and sex. This preliminary analysis  
186 provided a general picture of basic characteristics of the data and identification of potential  
187 patterns. For inferential analysis, we applied the Chi-squared test to investigate associations  
188 between crash type and various factors, including cyclist and motorist characteristics, vehicle  
189 features, roadway conditions, and temporal variables. We then estimated crude odds ratios by  
190 estimating univariate logistic regression and adjusted odds ratios by multivariate logistic models,  
191 respectively. This approach allowed us to identify significant predictors while controlling for  
192 potential confounding variables.(22)

193 The multivariate logistic regression model equation was specified as:

$$194 \quad \log \left( \frac{P(Y = 1)}{1 - P(Y = 1)} \right) = \beta_0 + \beta_1 X_1 + \beta_2 X_2$$

195 where  $P(Y = 1)$  denotes the probability of the outcome,  $\beta_0, \beta_1, \beta_2, \dots, \beta_p$  are the coefficients to be  
196 estimated, and  $X_1, X_2, \dots, X_p$  represent the predictor variables.

197 Before estimating the model, assumptions of logistic regression, such as linearity of the logit,  
198 absence of multicollinearity, and independence of observations, were evaluated. An odds ratio  
199 (OR) greater than 1 indicated a positive association between the independent variable and the  
200 occurrence rate, while an OR less than 1 indicated a negative association. An OR of 1 suggested  
201 no association between the variables of interest and the outcomes. Additionally, joint effect  
202 analysis was employed to assess the risk associated with the combination of variables across the  
203 three types of crashes. All statistical analyses were conducted using SPSS Statistics version 25 for  
204 Windows (IBM Corp., Armonk, New York, USA). A *p* value lower than 0.05 in two-tailed tests was  
205 considered statistically significant.

206

## 207 **Results**

### 208 **Population characteristics**

209 Tables 1, 2, and 3 present the distributions of overtaking, rear-end, and door crashes,  
210 respectively, in relation to multiple independent variables. These data revealed that a significant  
211 proportion of bicycle crashes occurred in daylight (82.3%), occurred in urban settings (78.5%),  
212 occurred during nonrush hours (48.3%), occurred on weekdays (77.5%), involved cyclists aged  
213 under 18 years (40.1%), and involved male cyclists (81.3%). Additionally, most crashes involved  
214 cars as crash partners (83.6%), and crash partners were predominately aged 19–40 years (38.5%)  
215 and were male (76.4%). Table 1 highlights an overrepresentation in bicycle overtaking crashes  
216 for certain variables, namely unlit darkness (19.5%), rural areas (24.8%), midnight hours (17.7%),  
217 buses or HGVs as crash partners (24.7%), and elderly crash partners (21.5%) and male crash  
218 partners (16.0%). These results were revealed to be statistically significant by the chi-squared

219 test ( $p < 0.01$ ).

220

221 **Table 1.** Distribution of overtaking crashes according to a set of independent variables

| Variable                                  | Total<br>(n=127,637) | Overtaking<br>crashes<br>(n=18,350) | Non-overtaking<br>crashes<br>(n=109,287) | $\chi^2$ test<br><i>p</i> value |
|-------------------------------------------|----------------------|-------------------------------------|------------------------------------------|---------------------------------|
| <b>Light conditions, n (%)</b>            |                      |                                     |                                          | <0.001                          |
| Daylight                                  | 105,053 (82.3)       | 15,283 (14.6)                       | 89,770 (85.5)                            |                                 |
| Darkness-lit                              | 16,543 (13.0)        | 1,889 (11.4)                        | 14,654 (88.6)                            |                                 |
| Darkness-unlit                            | 6,041 (4.7)          | 1,178 (19.5)                        | 4,863 (80.5)                             |                                 |
| <b>Speed limit, n (%)</b>                 |                      |                                     |                                          | <0.001                          |
| Rural ( $\geq 40$ mph)                    | 27,395 (21.5)        | 6,805 (24.8)                        | 20,590 (75.6)                            |                                 |
| Urban (20–30 mph)                         | 100,242 (78.5)       | 11,545 (11.5)                       | 88,697 (88.5)                            |                                 |
| <b>Crash time (h), n (%)</b>              |                      |                                     |                                          | <0.001                          |
| Midnight (00:00–06:00)                    | 4,810 (3.8)          | 852 (17.7)                          | 3,958 (82.3)                             |                                 |
| Rush hours (07:00–08:00/17:00–18:00)      | 41,619 (32.6)        | 5,685 (13.7)                        | 35,934 (86.3)                            |                                 |
| Nonrush hours (09:00–16:00)               | 61,696 (48.3)        | 9,386 (15.2)                        | 52,310 (84.8)                            |                                 |
| Evening (19:00–23:00)                     | 19,512 (15.3)        | 2,427 (12.4)                        | 17,085 (87.6)                            |                                 |
| <b>Crash day, n (%)</b>                   |                      |                                     |                                          | 0.094                           |
| Weekend                                   | 28,730 (22.5)        | 4,218 (14.7)                        | 24,512 (85.2)                            |                                 |
| Weekday                                   | 98,907 (77.5)        | 14,132 (14.3)                       | 84,775 (85.7)                            |                                 |
| <b>Cyclist's age (years), n (%)</b>       |                      |                                     |                                          | <0.001                          |
| $\leq 18$                                 | 51,193 (40.1)        | 5,220 (10.2)                        | 45,973 (89.8)                            |                                 |
| 19–40                                     | 45,760 (35.9)        | 7,108 (15.5)                        | 38,652 (84.5)                            |                                 |
| 41–64                                     | 26,052 (20.4)        | 5,012 (19.2)                        | 21,040 (80.8)                            |                                 |
| $\geq 65$                                 | 4,632 (3.6)          | 1,010 (21.8)                        | 3,622 (78.2)                             |                                 |
| <b>Cyclist's sex, n (%)</b>               |                      |                                     |                                          | <0.001                          |
| Male                                      | 103,766 (81.3)       | 14,746 (14.2)                       | 89,020 (85.8)                            |                                 |
| Female                                    | 23,871 (18.7)        | 3,604 (15.1)                        | 20,267 (84.9)                            |                                 |
| <b>Crash partner, n (%)</b>               |                      |                                     |                                          | <0.001                          |
| Taxi/Private hire car                     | 2,588 (2.0)          | 208 (8.0)                           | 2,380 (92.0)                             |                                 |
| Car                                       | 106,668 (83.6)       | 13,599 (12.8)                       | 93,069 (87.3)                            |                                 |
| Bus/Heavy goods vehicle                   | 18,381 (14.4)        | 4,543 (24.7)                        | 13,838 (75.3)                            |                                 |
| <b>Crash partner's age (years), n (%)</b> |                      |                                     |                                          | <0.001                          |
| $\leq 18$                                 | 2,415 (1.9)          | 281 (11.6)                          | 2,134 (88.4)                             |                                 |
| 19–40                                     | 49,103 (38.5)        | 5,398 (11.0)                        | 43,705 (89.0)                            |                                 |
| 41–64                                     | 35,598 (27.9)        | 3,973 (11.2)                        | 31,625 (88.8)                            |                                 |
| $\geq 65$                                 | 40,521 (31.8)        | 8,698 (21.5)                        | 31,823 (78.5)                            |                                 |
| <b>Crash partner's sex, n (%)</b>         |                      |                                     |                                          | <0.001                          |
| Male                                      | 97,447 (76.4)        | 15,584 (16.0)                       | 81,863 (84.0)                            |                                 |
| Female                                    | 30,190 (23.8)        | 2,766 (9.2)                         | 27,424 (90.8)                            |                                 |

222

223 Several variables in Table 2 reveal significant differences between rear-end crashes and non-

224 rear-end crashes. Specifically, a higher proportion of rear-end crashes occurred under darkness-

225 unlit conditions (50.2%) compared to darkness-lit conditions (37.5%). Additionally, rear-end  
 226 crashes were more prevalent in rural areas with speed limits of  $\geq 40$  mph (43.0%) compared to  
 227 urban areas with speed limits of 20–30 mph (33.1%). Crashes involving crash partners aged  $\geq 65$   
 228 accounted for 39.7% of rear-end crashes, which was higher compared to other age groups (age  
 229 41–64: 33.0% and  $\leq 18$ : 36.0%). Furthermore, rear-end crashes were more likely to occur during  
 230 midnight (47.6%) compared to rush hours (36.3%). Taxis or private hire cars were frequently  
 231 involved in rear-end crashes (42.4%), as were male crash partners (36.8%). These findings  
 232 highlight the significant influence of various factors on the likelihood of rear-end crashes.  
 233 Variables such as darkness-unlit conditions, higher speed limits in rural areas, crash time, and  
 234 characteristics of the crash partner all emerged as significant determinants. Importantly, these  
 235 associations were statistically significant, as indicated by the Chi-squared test ( $p < 0.001$ ).

236

237 **Table 2.** Distribution of rear-end crashes according to a set of independent variables

| Variable                             | Total<br>(n=127,637) | Rear-end<br>crashes<br>(n=44,962) | Non-rear-end<br>crashes<br>(n=82,675) | $\chi^2$ test<br><i>p</i> value |
|--------------------------------------|----------------------|-----------------------------------|---------------------------------------|---------------------------------|
| <b>Light conditions, n (%)</b>       |                      |                                   |                                       | <0.001                          |
| Daylight                             | 105,053 (82.3)       | 35,726 (34.1)                     | 69,333 (66.0)                         |                                 |
| Darkness-lit                         | 16,543 (13.0)        | 6,204 (37.5)                      | 10,339 (63.5)                         |                                 |
| Darkness-unlit                       | 6,041 (4.73)         | 3,032 (50.19)                     | 3,003 (49.71)                         |                                 |
| <b>Speed limit, n (%)</b>            |                      |                                   |                                       | <0.001                          |
| Rural ( $\geq 40$ mph)               | 27,395 (21.5)        | 11,788 (43.0)                     | 15,607 (57.0)                         |                                 |
| Urban (20–30 mph)                    | 100,242 (78.5)       | 33,174 (33.1)                     | 67,068 (66.9)                         |                                 |
| <b>Crash time (h), n (%)</b>         |                      |                                   |                                       | <0.001                          |
| Midnight (00:00–06:00)               | 4,810 (3.8)          | 2,289 (47.6)                      | 2,521 (52.4)                          |                                 |
| Rush hours (07:00–08:00/17:00–18:00) | 41,619 (32.6)        | 15,089 (36.3)                     | 26,530 (63.7)                         |                                 |
| Nonrush hours (09:00–16:00)          | 61,696 (48.3)        | 20,723 (33.6)                     | 40,973 (66.4)                         |                                 |
| Evening (19:00–23:00)                | 19,512 (15.3)        | 6,861 (36.2)                      | 12,651 (64.9)                         |                                 |
| <b>Crash day, n (%)</b>              |                      |                                   |                                       | <0.001                          |
| Weekend                              | 28,730 (22.5)        | 9,485 (33.0)                      | 19,245 (67.0)                         |                                 |
| Weekday                              | 98,907 (77.5)        | 35,477 (35.9)                     | 63,430 (64.1)                         |                                 |
| <b>Cyclist's age (years), n (%)</b>  |                      |                                   |                                       | <0.001                          |
| $\leq 18$                            | 51,193 (40.1)        | 13,446 (26.3)                     | 37,747 (73.7)                         |                                 |
| 19–40                                | 45,760 (35.9)        | 19,102 (41.7)                     | 26,658 (58.3)                         |                                 |
| 41–64                                | 26,052 (20.4)        | 10,619 (40.8)                     | 15,433 (59.2)                         |                                 |
| $\geq 65$                            | 4,632 (3.6)          | 1,795 (38.8)                      | 2,837 (61.3)                          |                                 |

|                                           |                |               |               |        |
|-------------------------------------------|----------------|---------------|---------------|--------|
| <b>Cyclist's sex, n (%)</b>               |                |               |               | <0.001 |
| Male                                      | 103,766 (81.3) | 37,175 (35.8) | 66,591 (64.2) |        |
| Female                                    | 23,871 (18.7)  | 7,787 (32.6)  | 16,084 (67.4) |        |
| <b>Crash partner, n (%)</b>               |                |               |               | <0.001 |
| Taxi/Private hire car                     | 2,588 (2.0)    | 1,096 (42.4)  | 1,492 (57.7)  |        |
| Car                                       | 106,668 (83.6) | 37,202 (34.9) | 71,342 (66.9) |        |
| Bus/Heavy goods vehicle                   | 18,381 (14.4)  | 6,664 (36.3)  | 9,841 (53.5)  |        |
| <b>Crash partner's age (years), n (%)</b> |                |               |               | <0.001 |
| ≤18                                       | 2,415 (1.9)    | 870 (36.0)    | 1,545 (64.0)  |        |
| 19–40                                     | 49,103 (38.5)  | 16,282 (33.2) | 32,821 (66.8) |        |
| 41–64                                     | 35,598 (27.9)  | 11,736 (33.0) | 23,862 (67.0) |        |
| ≥65                                       | 40,521 (31.8)  | 16,074 (40.0) | 24,447 (60.3) |        |
| <b>Crash partner's sex, n (%)</b>         |                |               |               | <0.001 |
| Male                                      | 97,447 (76.6)  | 35,828 (36.8) | 61,619 (63.2) |        |
| Female                                    | 30,190 (23.7)  | 9,134 (30.3)  | 21,056 (69.7) |        |

238  
239 As shown in Table 3, several variables can contribute to door crashes involving bicycles. Door  
240 crashes predominantly occurred in urban areas with speed limits of 20-30 mph (6.2%), while a  
241 significantly lower proportion occurred in rural areas with speed limits  $\geq$  40 mph (0.5%). These  
242 crashes were overrepresented during non-rush hours (5.5%) and rush hours (4.9%) compared to  
243 evening (4.3%) and midnight (2.4%). Cyclists were more frequently involved in door crashes on  
244 weekdays (5.4%) than weekends (3.7%). As many as 8.2% of all female cyclists were involved in  
245 door crashes, which is higher than the involvement rate among males (4.2%). Taxi and private  
246 hire cars were overinvolved in door crashes (10.6%) compared to cars (5.2%) and buses/heavy  
247 goods vehicles (3.1%). Crash partners aged  $\leq$ 18 years (5.2%) and 19-40 years (5.3%) were  
248 disproportionately involved in door crashes compared to older age groups, and female crash  
249 partners were overrepresented in door crashes (7.4%) compared to males (4.2%). These results  
250 were statistically significant, as indicated by the Chi-squared test ( $p < 0.001$ ). They suggest that  
251 various factors—including traffic conditions (rural areas, crash time), cyclist demographics  
252 (younger age, female), and characteristics of the crash partner (taxi/private hire cars)—  
253 significantly contribute to the likelihood of door crashes involving cyclists.

254 **Table 3.** Distribution of door crashes according to a set of independent variables

| Variable                                  | Total<br>(n=127,637) | Door crashes<br>(n=6,363) | Non-door<br>crashes<br>(n=121,274) | $\chi^2$ test<br>p value |
|-------------------------------------------|----------------------|---------------------------|------------------------------------|--------------------------|
| <b>Light conditions, n (%)</b>            |                      |                           |                                    | <0.001                   |
| Daylight                                  | 105,053 (82.3)       | 5,192 (4.9)               | 99,861 (95.1)                      |                          |
| Darkness-lit                              | 16,543 (13.0)        | 1,031 (6.2)               | 15,512 (93.8)                      |                          |
| Darkness-unlit                            | 6,041 (4.7)          | 140 (2.3)                 | 5,901 (97.7)                       |                          |
| <b>Speed limit, n (%)</b>                 |                      |                           |                                    | <0.001                   |
| Rural ( $\geq$ 40 mph)                    | 27,395 (21.5)        | 123 (0.5)                 | 27,272 (99.6)                      |                          |
| Urban (20–30 mph)                         | 100,242 (78.5)       | 6,240 (6.2)               | 94,002 (93.8)                      |                          |
| <b>Crash time (h), n (%)</b>              |                      |                           |                                    | <0.001                   |
| Midnight (00:00–06:00)                    | 4,810 (3.8)          | 113 (2.4)                 | 4,697 (97.7)                       |                          |
| Rush hours (07:00–08:00/17:00–18:00)      | 41,619 (32.6)        | 2,056 (4.9)               | 39,563 (95.1)                      |                          |
| Nonrush hours (09:00–16:00)               | 61,696 (48.3)        | 3,363 (5.5%)              | 58,333 (94.6)                      |                          |
| Evening (19:00–23:00)                     | 19,512 (15.3)        | 831 (4.3)                 | 18,681 (95.7)                      |                          |
| <b>Crash day, n (%)</b>                   |                      |                           |                                    | <0.001                   |
| Weekend                                   | 28,730 (22.5)        | 1,072 (3.7)               | 27,658 (96.3)                      |                          |
| Weekday                                   | 98,907 (77.5)        | 5,291 (5.4)               | 93,616 (94.7)                      |                          |
| <b>Cyclist's age (years), n (%)</b>       |                      |                           |                                    | <0.001                   |
| $\leq$ 18                                 | 51,193 (40.1)        | 802 (1.6)                 | 50,391 (98.4)                      |                          |
| 19–40                                     | 45,760 (35.9)        | 3,474 (7.6)               | 42,286 (93.4)                      |                          |
| 41–64                                     | 26,052 (20.4)        | 1,773 (6.8)               | 24,279 (93.2)                      |                          |
| $\geq$ 65                                 | 4,632 (3.6)          | 314 (6.8)                 | 4,318 (93.2)                       |                          |
| <b>Cyclist's sex, n (%)</b>               |                      |                           |                                    | <0.001                   |
| Male                                      | 103,766 (81.3)       | 4,404 (4.2)               | 99,362 (95.8)                      |                          |
| Female                                    | 23,871 (18.7)        | 1,959 (8.2)               | 21,912 (91.8)                      |                          |
| <b>Crash partner, n (%)</b>               |                      |                           |                                    | <0.001                   |
| Taxi/Private hire car                     | 2,588 (2.0)          | 273 (10.6)                | 2,315 (89.5)                       |                          |
| Car                                       | 106,668 (83.6)       | 5,514 (5.2)               | 101,154 (94.8)                     |                          |
| Bus/Heavy goods vehicle                   | 18,381 (14.4)        | 576 (3.1)                 | 17,805 (96.9)                      |                          |
| <b>Crash partner's age (years), n (%)</b> |                      |                           |                                    | <0.001                   |
| $\leq$ 18                                 | 2,415 (1.9)          | 1,62 (5.2)                | 2,253 (93.3)                       |                          |
| 19–40                                     | 49,103 (38.5)        | 2,585 (5.3)               | 46,518 (94.7)                      |                          |
| 41–64                                     | 35,598 (27.9)        | 1,887 (5.3)               | 33,711 (94.7)                      |                          |
| $\geq$ 65                                 | 40,521 (31.8)        | 1,729 (4.3)               | 38,792 (95.7)                      |                          |
| <b>Crash partner's sex, n (%)</b>         |                      |                           |                                    | <0.001                   |
| Male                                      | 97,447 (76.6)        | 4,123 (4.2)               | 93,324 (95.8)                      |                          |
| Female                                    | 30,190 (23.7)        | 2,240 (7.4)               | 27,950 (92.6)                      |                          |

255

256

257 **Risk factors for the three crash types**

258

259 **Table 4.** Univariate logistic regression results

| Variable               | Overtaking crashes |         | Rear-end crashes  |         | Door crashes      |         |
|------------------------|--------------------|---------|-------------------|---------|-------------------|---------|
|                        | AOR (95% CI)       | p value | AOR (95% CI)      | p value | AOR (95% CI)      | p value |
| <b>Light condition</b> |                    |         |                   |         |                   |         |
| Daylight               | Ref                |         | Ref               |         | Ref               |         |
| Darkness-lit           | 0.80 (0.77, 0.82)  | <0.001  | 1.11 (1.08, 1.14) | 0.036   | 1.19 (1.17, 1.26) | <0.001  |
| Darkness-unlit         | 0.93 (0.89, 0.95)  | 0.001   | 1.50 (1.46, 1.56) | <0.001  | 0.74 (0.72, 1.02) | 0.198   |

|                                    |                     |        |                    |        |                    |        |
|------------------------------------|---------------------|--------|--------------------|--------|--------------------|--------|
| <b>Speed limit</b>                 |                     |        |                    |        |                    |        |
| Rural (≥40 mph)                    | Ref                 |        | Ref                |        | Ref                |        |
| Urban (20–30 mph)                  | 0.40 (0.37, 0.47)   | <0.001 | 0.75 (0.73, 0.79)  | <0.001 | 15.3 (14.6, 18.1)  | <0.001 |
| <b>Crash time</b>                  |                     |        |                    |        |                    |        |
| Midnight                           | 1.05 (0.97, 1.10)   | 0.157  | 1.34 (1.30, 1.39)  | <0.001 | 0.39 (0.35, 0.47)  | <0.001 |
| Rush hours                         | 1.04 (0.98, 1.08)   | 0.116  | 1.16 (1.12, 1.20)  | 0.003  | 1.36 (1.31, 1.55)  | <0.001 |
| Nonrush hours                      | 1.12 (1.06, 1.14)   | 0.007  | 1.02 (0.97, 1.13)  | 0.742  | 1.78 (1.68, 1.89)  | <0.001 |
| Evening                            | Ref                 |        | Ref                |        | Ref                |        |
| <b>Crash day</b>                   |                     |        |                    |        |                    |        |
| Weekend                            | Ref                 |        | Ref                |        | Ref                |        |
| Weekday                            | 0.92 (0.90, 1.04)   | 0.341  | 1.08 (1.07, 1.13)  | <0.001 | 1.33 (1.25, 1.36)  | <0.001 |
| <b>Cyclist's age (years)</b>       |                     |        |                    |        |                    |        |
| ≤18                                | Ref                 |        | Ref                |        | Ref                |        |
| 19–40                              | 1.28 (1.23, 1.39)   | <0.001 | 1.80 (1.76, 1.99)  | <0.001 | 5.26 (5.20, 5.86)  | <0.001 |
| 41–64                              | 1.47 (1.33, 1.61)   | <0.001 | 1.68 (1.64, 1.81)  | <0.001 | 5.66 (5.47, 6.00)  | <0.001 |
| ≥65                                | 1.84 (1.78, 1.97)   | <0.001 | 1.54 (1.51, 1.80)  | <0.001 | 5.13 (5.01, 5.83)  | <0.001 |
| <b>Cyclist's sex</b>               |                     |        |                    |        |                    |        |
| Male                               | Ref                 |        | Ref                |        | Ref                |        |
| Female                             | 1.14 (1.10, 1.17)   | <0.001 | 0.81 (0.79, 0.91)  | <0.001 | 1.48 (1.33, 1.67)  | <0.001 |
| <b>Crash partner</b>               |                     |        |                    |        |                    |        |
| Taxi/Private hire car              | 0.63 (0.641, 0.680) | <0.001 | 1.27 (1.24, 1.334) | <0.001 | 1.78 (1.46, 1.82)  | <0.001 |
| Car                                | Ref                 |        | Ref                |        | Ref                |        |
| Bus/HGV                            | 1.31 (1.24, 1.41)   | <0.001 | 1.05 (1.01, 1.15)  | <0.001 | 0.433 (0.40, 0.51) | <0.001 |
| <b>Crash partner's age (years)</b> |                     |        |                    |        |                    |        |
| ≤18                                | 1.03 (0.97, 1.21)   | 0.251  | 1.15 (1.11, 1.34)  | <0.001 | 0.65 (0.62, 0.69)  | <0.001 |
| 19–40                              | Ref                 |        | Ref                |        | Ref                |        |
| 41–64                              | 0.93 (0.91, 0.98)   | 0.035  | 0.98 (0.97, 1.03)  | 0.138  | 0.96 (0.94, 0.99)  | <0.001 |
| ≥65                                | 2.33 (1.99, 2.56)   | <0.001 | 1.25 (1.20, 1.31)  | <0.001 | 0.51 (0.47, 0.56)  | <0.001 |
| <b>Crash partner's sex</b>         |                     |        |                    |        |                    |        |
| Male                               | 1.28 (1.25, 1.33)   | <0.001 | 1.23 (1.15, 1.39)  | <0.001 | 1.30 (1.25, 1.53)  | <0.001 |
| Female                             | Ref                 |        | Ref                |        | Ref                |        |

260 Table 4 presents the results of the univariate logistic regression models. In terms of overtaking  
261 crashes, conditions of darkness with lighting (AOR 0.80, 95% CI: 0.77–0.82,  $p < 0.001$ ) and  
262 darkness without lighting (AOR 0.93, 95% CI: 0.89–0.95,  $p = 0.001$ ) were linked to a reduced  
263 likelihood of crashes when compared to daylight conditions. Urban roads with lower speed limits  
264 (20–30 mph) significantly reduced the odds of overtaking crashes compared to rural roads (AOR  
265 0.40, 95% CI: 0.37–0.47,  $p < 0.001$ ). In terms of cyclist demographics, older cyclists (≥65 years)  
266 were at a notably higher risk (AOR 1.84, 95% CI: 1.78–1.97,  $p < 0.001$ ), and male cyclists were  
267 more likely to be involved than female cyclists (AOR 1.14, 95% CI: 1.10–1.17,  $p < 0.001$ ).  
268 Additionally, crashes involving buses or heavy goods vehicles (HGVs) increased the likelihood of

269 overtaking crashes (AOR 1.31, 95% CI: 1.24–1.41,  $p < 0.001$ ).

270 For rear-end crashes, both lit (AOR 1.11, 95% CI: 1.08–1.14,  $p = 0.036$ ) and unlit (AOR 1.50,  
271 95% CI: 1.46–1.56,  $p < 0.001$ ) darkness conditions were associated with a higher likelihood of  
272 crashes compared to daylight. Urban areas were linked to a decreased risk of rear-end crashes  
273 compared to rural areas (AOR 0.75, 95% CI: 0.73–0.79,  $p < 0.001$ ). The likelihood of rear-end  
274 crashes was significantly higher during midnight (AOR 1.34, 95% CI: 1.30–1.39,  $p < 0.001$ ) and  
275 rush hours (AOR 1.16, 95% CI: 1.12–1.20,  $p = 0.003$ ). As with overtaking crashes, older cyclists  
276 had an elevated risk (AOR 1.54, 95% CI: 1.51–1.80,  $p < 0.001$ ), while males had slightly reduced  
277 odds compared to females (AOR 0.81, 95% CI: 0.79–0.91,  $p < 0.001$ ). Crashes involving buses or  
278 heavy goods vehicles were slightly more likely to result in rear-end crashes (AOR 1.05, 95% CI:  
279 1.01–1.15,  $p < 0.001$ ).

280 Regarding door crashes, lit conditions during darkness were associated with increased odds of  
281 crashes (AOR 1.19, 95% CI: 1.17–1.26,  $p < 0.001$ ), whereas unlit conditions did not show a  
282 significant difference compared to daylight (AOR 0.74, 95% CI: 0.72–1.02,  $p = 0.198$ ). Urban  
283 environments with lower speed limits were strongly linked to a higher risk of door crashes (AOR  
284 15.3, 95% CI: 14.6–18.1,  $p < 0.001$ ). Older cyclists ( $\geq 65$  years) faced a substantially increased risk  
285 (AOR 5.13, 95% CI: 5.01–5.83,  $p < 0.001$ ), and male cyclists were more likely to be involved than  
286 females (AOR 1.48, 95% CI: 1.33–1.67,  $p < 0.001$ ). Interestingly, crashes involving buses or heavy  
287 goods vehicles reduced the likelihood of door crashes compared to cars (AOR 0.433, 95% CI:  
288 0.40–0.51,  $p < 0.001$ ).

289  
290 **Table 5.** Multivariate logistic regression results  
291

| Variable | Overtaking crashes | Rear-end crashes | Door crashes |
|----------|--------------------|------------------|--------------|
|----------|--------------------|------------------|--------------|



|                                    | AOR (95% CI)      | p value | AOR (95% CI)      | p value | AOR (95% CI)      | p value |
|------------------------------------|-------------------|---------|-------------------|---------|-------------------|---------|
| <b>Light condition</b>             |                   |         |                   |         |                   |         |
| Daylight                           | Ref               |         | Ref               |         | Ref               |         |
| Darkness-lit                       | 0.81 (0.80, 0.84) | <0.001  | 1.04 (1.00, 1.09) | 0.041   | 1.23 (1.20, 1.24) | <0.001  |
| Darkness-unlit                     | 0.92 (0.90, 0.93) | 0.001   | 1.49 (1.40, 1.57) | <0.001  | 0.87 (0.86, 1.02) | 0.136   |
| <b>Speed limit</b>                 |                   |         |                   |         |                   |         |
| Rural (≥40 mph)                    | Ref               |         | Ref               |         | Ref               |         |
| Urban (20–30 mph)                  | 0.45 (0.43, 0.47) | <0.001  | 0.76 (0.74, 0.79) | <0.001  | 16.2 (13.5, 19.4) | <0.001  |
| <b>Crash time</b>                  |                   |         |                   |         |                   |         |
| Midnight                           | 1.07 (0.98, 1.17) | 0.119   | 1.28 (1.21, 1.40) | <0.001  | 0.50 (0.46, 0.53) | <0.001  |
| Rush hours                         | 1.06 (1.00, 1.12) | 0.043   | 1.12 (1.09, 1.15) | <0.001  | 1.49 (1.45, 1.62) | <0.001  |
| Nonrush hours                      | 1.09 (1.03, 1.15) | 0.003   | 1.01 (0.96, 1.10) | 0.639   | 1.90 (1.81, 1.93) | <0.001  |
| Evening                            | Ref               |         | Ref               |         | Ref               |         |
| <b>Crash day</b>                   |                   |         |                   |         |                   |         |
| Weekend                            | Ref               |         | Ref               |         | Ref               |         |
| Weekday                            | 0.97 (0.96, 1.01) | 0.133   | 1.09 (1.06, 1.12) | <0.001  | 1.25 (1.16, 1.34) | <0.001  |
| <b>Cyclist's age (years)</b>       |                   |         |                   |         |                   |         |
| ≤18                                | Ref               |         | Ref               |         | Ref               |         |
| 19–40                              | 1.29 (1.24, 1.35) | <0.001  | 1.84 (1.79, 1.89) | <0.001  | 5.94 (5.49, 6.44) | <0.001  |
| 41–64                              | 1.51 (1.44, 1.58) | <0.001  | 1.73 (1.68, 1.79) | <0.001  | 6.13 (5.62, 6.68) | <0.001  |
| ≥65                                | 1.79 (1.65, 1.93) | <0.001  | 1.67 (1.57, 1.78) | <0.001  | 5.99 (5.22, 6.87) | <0.001  |
| <b>Cyclist's sex</b>               |                   |         |                   |         |                   |         |
| Male                               | Ref               |         | Ref               |         | Ref               |         |
| Female                             | 1.11 (1.06, 1.15) | <0.001  | 0.85 (0.83, 0.90) | <0.001  | 1.68 (1.58, 1.77) | <0.001  |
| <b>Crash partner</b>               |                   |         |                   |         |                   |         |
| Taxi/Private hire car              | 0.64 (0.61, 0.69) | <0.001  | 1.29 (1.19, 1.39) | <0.001  | 1.61 (1.59, 1.69) | <0.001  |
| Car                                | Ref               |         | Ref               |         | Ref               |         |
| Bus/HGV                            | 1.30 (1.27, 1.33) | <0.001  | 1.10 (1.06, 1.14) | <0.001  | 0.48 (0.45, 0.49) | <0.001  |
| <b>Crash partner's age (years)</b> |                   |         |                   |         |                   |         |
| ≤18                                | 1.10 (0.96, 1.25) | 0.162   | 1.19 (1.17, 1.24) | <0.001  | 0.65 (0.63, 0.68) | <0.001  |
| 19–40                              | Ref               |         | Ref               |         | Ref               |         |
| 41–64                              | 0.95 (0.91, 0.99) | 0.025   | 0.96 (0.95, 0.98) | 0.026   | 0.95 (0.93, 0.98) | <0.001  |
| ≥65                                | 2.01 (1.94, 2.09) | <0.001  | 1.20 (1.18, 1.31) | <0.001  | 0.54 (0.52, 0.57) | <0.001  |
| <b>Crash partner's sex</b>         |                   |         |                   |         |                   |         |
| Male                               | 1.35 (1.29, 1.42) | <0.001  | 1.15 (1.12, 1.19) | <0.001  | 1.37 (1.30, 1.46) | <0.001  |
| Female                             | Ref               |         | Ref               |         | Ref               |         |

292 Table 5 presents the results of the multivariate logistic regression analysis. In overtaking  
293 crashes, the presence of HGVs as partners increases the likelihood by 1.3 times (AOR = 1.30, 95%  
294 CI = 1.27–1.33;  $p < 0.001$ ). For cyclists aged 65 and older, the adjusted odds ratio (AOR) is 1.79  
295 (95% CI = 1.65–1.93;  $p < 0.001$ ) compared to those aged 18 and younger. Factors associated with  
296 a decreased likelihood of crashes include daylight conditions (AOR = 0.81, 95% CI = 0.80–0.84;  $p$   
297  $< 0.001$ ) and rural areas with speed limits of 40 mph or higher (AOR = 0.45, 95% CI = 0.43–0.47;

298 p < 0.001).

299 For rear-end crashes, significant risk factors included darkness and unlit conditions (AOR =  
300 1.49, 95% confidence interval [CI] = 1.40–1.57; p < 0.001), crashes occurring on weekdays (AOR  
301 = 1.09, 95% CI = 1.06–1.12; p < 0.001), and an increased likelihood of rear-end crashes during  
302 rush hours (AOR = 1.12, 95% CI = 1.09–1.15; p < 0.001). In contrast, the risk is lower in urban  
303 areas (AOR = 0.76, 95% CI = 0.74–0.79; p < 0.001) when rural areas are used as the reference.

304 Door crashes are significantly more prevalent in urban areas with speed limits of 20 to 30  
305 mph—approximately 16 times higher (AOR = 16.2, 95% CI = 13.5–19.4; p < 0.001). Additionally,  
306 interactions with taxis or private hire cars as crash partners further increase the likelihood of  
307 these crashes (AOR = 1.61, 95% CI = 1.59–1.69; p < 0.001). Other important risk factors include  
308 conditions of darkness with illumination (AOR = 1.23, 95% CI = 1.20–1.24; p < 0.001) and crashes  
309 occurring on weekdays (AOR = 1.25, 95% CI = 1.16–1.34; p < 0.001). Furthermore, male crash  
310 partners were associated with increased odds of door crashes (AOR = 1.37, 95% CI = 1.30–1.47;  
311 p < 0.001).

312  
313 Figure 2 presents a forest plot demonstrating the joint effects of several variables on the  
314 three crash types when other variables were controlled for. The results identified several key risk  
315 factors for both overtaking and rear-end crashes. The risk of overtaking crashes showed a  
316 significant increase of 193% in rural areas when elderly drivers were involved (AOR = 2.93, 95%  
317 CI = 2.79–3.08), and similarly when heavy goods vehicles (HGVs) were the crash partner (AOR =  
318 2.62, 95% CI = 2.46–2.78). Elderly cyclists also faced a higher risk of overtaking crashes on  
319 weekends (AOR = 1.56, 95% CI = 1.34–1.81).

320 Regarding rear-end crashes, the risk increased notably with unlit darkness during

321 midnight (AOR = 1.68, 95% CI = 1.48–1.90) and was significantly higher in rural areas (AOR = 2.15,  
322 95% CI = 2.01–2.31). Furthermore, bicycling at midnight in rural areas was associated with an  
323 increased risk of rear-end crashes (AOR = 1.68; 95% CI = 1.51–1.86). In urban settings, the risk of  
324 door crashes was higher for female cyclists (AOR = 2.29; 95% CI = 2.17–2.43) and for elderly  
325 cyclists (AOR = 2.06; 95% CI = 1.82–2.34). Finally, female cyclists exhibited a 112% higher  
326 likelihood of door crashes when the crash partner was a taxi (AOR = 2.12; 95% CI = 1.68–2.69).

327  
328

## 329 **Discussion**

330 This study explored the relationships among individual and environmental factors in relation  
331 to three common bicycle crash types (overtaking, rear-end, and door crashes) on roads in the  
332 United Kingdom from 1991 to 2020. The findings revealed several significant factors. First, for  
333 overtaking crashes, HGVs as crash partners, rural areas, and the involvement of elderly crash  
334 partners emerged as key contributing factors. Second, unlit darkness, midnight hours, and rural  
335 areas were the factors most closely associated with rear-end crashes. Third, urban areas and taxis  
336 as crash partners significantly increased the likelihood of door crashes. Moreover, male crash  
337 partners were found to be a consistent risk factor across all three crash types.

338 Our research findings identified specific risk factors for overtaking crashes, namely rural  
339 areas, HGVs as crash partners, and elderly crash partners. These findings align with previous  
340 research that identified elderly drivers (23), speeds exceeding 10 mph, and the presence of pick-  
341 up trucks as factors contributing to increased risk for overtaking crash. Specifically, HGVs possess  
342 several characteristics that amplify this danger. Their large blind spots make it difficult for drivers  
343 to see cyclists, increasing the likelihood of crashes during overtaking (24). Additionally, HGVs are

344 less manoeuvrable compared to passenger cars, which reduces their ability to avoid crashes if  
345 cyclists suddenly enter their path(25). The speed and distance perception issues between HGVs  
346 and cyclists further complicate the judgment of safe overtaking gaps(26). Furthermore, HGVs  
347 require longer stopping distances due to their size and weight, which can lead to severe  
348 consequences if a sudden need to brake arises. A behavioural study suggested that compared  
349 with cars, HGVs tended to maintain a narrower clearance zone when overtaking bicycles (27).  
350 Regarding the association with buses or HGVs, Pai et al. suggested that time pressures on HGV  
351 drivers for timely loading and unloading might lead to more reckless driving(18). Specifically, our  
352 results align with the observations made by Pai et al., who also mentioned higher crash rates  
353 involving buses or HGVs, supporting the idea that these time pressures contribute to increased  
354 crash risks. Our findings underscore the necessity of implementing measures such as ‘Share the  
355 Road’ warning signs (28), particularly in rural settings, where HGVs are likely to execute  
356 overtaking manoeuvres at high speed. Such measures could prompt motor vehicles to maintain  
357 safer distances from the edges of travel lanes, especially in areas with a notable presence of both  
358 HGVs and bicycles.

359 We also identified elderly drivers as a factor contributing to overtaking crashes—a finding  
360 consistent with relevant research (23). We found that as individuals age, their risk of being  
361 involved in road accidents increases, primarily due to declines in cognitive capabilities. Our study  
362 corroborates these findings by showing that older cyclists are more susceptible to accidents  
363 during overtaking manoeuvres, which can be attributed to diminished reaction times and  
364 impaired decision-making abilities (29), their health (30), and their driving performance (31).  
365 Notably, crashes involving elderly individuals often occur in scenarios with challenging conditions,

366 including at intersections without traffic control measures, on high-speed roads, during adverse  
367 weather conditions, in poorly lit areas, and in head-on accidents (32-34). The heightened level of  
368 risk under such conditions may be attributed to cognitive and perceptual decline in older drivers,  
369 which could affect their capacity to execute actions such as overtaking manoeuvres safely.  
370 Accordingly, developing specialised cognitive training programmes as interventions to enhance  
371 road safety for elderly drivers is evidently necessary (35). Based on our study's findings, we  
372 recommend the development of specialised interventions to improve road safety for elderly  
373 cyclists. Our analysis reveals that older cyclists are at a higher risk of being involved in overtaking  
374 crashes, with this increased risk being strongly linked to declines in cognitive capabilities  
375 associated with aging. To address this issue, we advocate for the implementation of targeted  
376 cognitive training programs specifically designed for elderly cyclists. These programs should focus  
377 on enhancing critical skills such as reaction time, situational awareness, and decision-making  
378 abilities, which are crucial for reducing crash risk and improving overall road safety.

379 In the present study, several factors were found to increase the risk of rear-end crashes on  
380 road segments, including darkness with unlit surroundings, midnight hours, and rural settings  
381 (speed limit > 40 mph). Although few studies have specifically addressed rear-end crashes  
382 involving bicycles on road segments, available data suggest that the low conspicuity of bicycles,  
383 especially at night, is a recurrent factor in rear-end crashes(18) . Moreover, a lack of adequate  
384 street lighting, which is common in rural settings, predisposes cyclists to rear-end crashes. Our  
385 joint-effects analysis further indicated that the detrimental effect of unlit darkness is more  
386 pronounced in rural areas and during midnight hours. Potential intervention strategies to  
387 mitigate rear-end crashes include enhancing illumination and executing speed control

388 management on rural road segments with heavy bicycle traffic.

389       Next, our analysis successfully identified associations of urban areas and taxis and private  
390 hire cars as crash partners with door crashes on road segments. Although research specifically  
391 focusing on door crashes on road segments is limited, similar findings were documented by Pai,  
392 indicating that urban roadways and taxis contributed to door crashes (18). However, determining  
393 the factors influencing this trend poses a challenge. One possible explanation could be the  
394 increased presence of taxis or private hire cars in such areas, where passengers often disembark.  
395 Additionally, our analysis further revealed an elevated risk of door crashes involving crashes with  
396 taxis in urban areas. To reduce door crashes on road segments, educating taxi drivers, as well as  
397 passengers, about the importance of vigilance when opening doors near traffic is essential (18).  
398 In addition, cyclists should be advised to maintain at least a door's width distance from all parked  
399 cars to improve the sight triangles of drivers and increase the visibility of cyclists (36).  
400 Implementing a two-stage door opening mechanism for vehicles, which would enable drivers to  
401 verify the presence of bicycles to the rear, could also be beneficial (37).

402       The strengths of this study include the use of STATS19 datasets spanning from 1991 to 2020,  
403 which provides a robust statistical foundation and a broad perspective on trends in bicycle  
404 crashes. By focusing specifically on three crash types on road segments—overtaking, rear-end,  
405 and door crashes—the study provides a comprehensive and focused analysis, which can yield  
406 more actionable insights and more effective recommendations. The UK-based dataset ensures  
407 that the findings are particularly relevant for local policy and safety interventions. Additionally,  
408 the application of statistical techniques and the consideration of various factors, such as crash  
409 partner and time of day, enhance the validity and depth of the analysis.

410 This study had several limitations that warrant acknowledgement. First, the substantial  
411 underreporting of nonfatal casualties to the police, particularly casualties involving cyclists not  
412 obligated to report accidents, is a critical factor to consider. Such underreporting, as highlighted  
413 by the U.K. Government’s Department for Transport (11), likely results in the incomplete  
414 representation of nonfatal and ‘slight’ casualties in road casualty data. Second, the STATS19 data  
415 utilised in this study lack critical variables, including precrash speeds, specific geometric  
416 characteristics of roadways, data regarding alcohol and illicit substance use, and cyclist speed at  
417 the time of an accident. Moreover, critical exposure data—such as those related to traffic flow,  
418 rider or driver experience, and other elements of risk exposure—are absent, and the absence of  
419 such details limits our ability to fully account for potential variations resulting from unobserved  
420 factors in the analyses. Finally, this study did not explore annual trends in each type of bicycle  
421 crash over the 30-year study period; investigating such trends could provide insights regarding  
422 changing behaviours among cyclists and motor vehicle drivers as well as the effects of legislative  
423 changes for road speed limits.

424 One inherent problem with police-reported crash data is the variables not readily available,  
425 hereby causing unobserved heterogeneity across the observations. To overcome such a  
426 limitation, we estimated separate regression models, as suggested by Kim et al.(38), for the three  
427 crash types; such an approach provides greater explanatory power compared to single overall  
428 models. Further, we conducted joint-effect analyses of several variables of interest that capture  
429 heterogeneity. In our previous studies, we adopted the above-mentioned approaches to  
430 overcome the inherent problem with a success (39, 40).

431 Future research directions could involve integrating GPS (Global Positioning System) data

432 and weather conditions to analyse both injury frequency and fatalities of bicycle crashes on road  
433 segments. Additionally, exploring the potential of autonomous vehicles for detecting  
434 approaching bicycles for door-crashes and implementing AI-controlled lighting systems in rural  
435 areas for cyclist detection could be promising areas for further study.

436

### 437 **Recommendations**

438 For overtaking crashes, we recommend implementing 'Share the Road' warning signs,  
439 especially in rural areas, and developing specialized cognitive training programs for elderly  
440 drivers. Regarding rear-end crashes, our suggestions include improving illumination during night  
441 time and implementing speed control measures on rural road segments. For door crashes  
442 involving parked cars, we propose enhancing driver sight triangles and increasing cyclist visibility.  
443 Moreover, implementing a two-stage door opening mechanism and an automatic detection  
444 device in vehicles to alert drivers of bicycles approaching from behind could potentially be  
445 beneficial.

446

### 447 **Conclusions**

448 This study identified several significant risk factors for the three predominate types of crashes  
449 involving cyclists on road segments: HGVs as crash partners, elderly crash partners, and rural  
450 areas for overtaking crashes; unlit darkness, midnight hours, and rural areas for rear-end crashes;  
451 and urban areas and taxis as crash partners for door crashes. These risk factors remained  
452 unchanged since our previous study conducted in 2011(18). The present research enhances the  
453 field of bicycle safety research by concluding that the detrimental effects of certain variables



454 become more pronounced under certain conditions. For example, first, cyclists in rural settings  
455 exhibited an elevated risk of overtaking crashes involving HGVs. Second, the rear-end crash risk  
456 increases in the combined presence of unlit darkness, midnight hours, and rural areas. Finally, in  
457 urban settings, the likelihood of door crashes increases when a taxi is the crash partner.

458

#### 459 **Abbreviations**

460 WHO: World Health Organization; HGVs: heavy goods vehicles; AOR: adjusted odds ratio; CI:  
461 confidence interval.

462

#### 463 **Acknowledgments**

464 This manuscript was edited by Wallace Academic Editing.

465

#### 466 **Author contributions**

467 **Literature review:** Chun-Chieh Chao.

468 **Methodology:** Chun-Chieh Chao, Chih-Wei Pai.

469 **Data merging and analysis:** Akhmad Fajri Widodo, Wafaa Saleh, Bayu Satria Wiratama.

470 **Writing - original draft:** Chun-Chieh Chao.

471 **Writing – review and editing:** Hui-An Lin, Chenyi Chen, Hon-Ping Ma, Akhmad Fajri Widodo  
472 Cheng-Wei Chan,.

473 **Validation:** Chun-Chieh Chao, Hui-An Lin, Chenyi Chen, Hon-Ping Ma, Shih Yu Ko.

474 **Supervision:** Li Wei, Yen-Nung Lin, Shou-Chien Hsu, Chih-Wei Pai.

475

476

477

### 478 **Availability of data and materials**

479 This study utilised the British STATS19 database, which contains data on all road traffic accidents

480 in the United Kingdom. The data that support the findings of this study are openly available at

481 <https://figshare.com/ndownloader/files/48173452>.

482

### 483 **Declarations**

#### 484 **Ethical approval and consent to participate**

485 This study was conducted in accordance with the Declaration of Helsinki and approved by the

486 Joint Institutional Review Board of Taipei Medical University (N202011030).

487

#### 488 **Consent for publication**

489 This study was approved by the Joint Institutional Review Board of Taipei Medical

490 University (N202011030). The Joint Institutional Review Board of Taipei Medical University has

491 waived the requirement of informed consent. All methods were performed in accordance with

492 the relevant guidelines and regulations of the Declaration of Helsinki.

493

#### 494 **Competing interests**

495 The authors declare that they have no competing interests in relation to this work.

496

497 **Author information**

498 <sup>1</sup>Graduate Institute of Injury Prevention and Control, College of Public Health, Taipei Medical  
499 University, Taipei City, Taiwan. <sup>2</sup>Department of Emergency Medicine, Taipei Medical University  
500 Hospital, Taipei City, Taiwan. <sup>3</sup>Department of Emergency Medicine, School of Medicine, College  
501 of Medicine, Taipei Medical University, Taipei City, Taiwan. <sup>4</sup>Department of Emergency Medicine,  
502 New Taipei City Hospital, New Taipei City, Taiwan. <sup>5</sup>College of Medicine, Chang Gung University,  
503 Taoyuan City, Taiwan. <sup>6</sup>Department of Emergency Medicine, Chang Gung Memorial Hospital,  
504 Linkou branch, Taoyuan, Taiwan. <sup>7</sup> Department of Emergency Medicine, Taipei Medical  
505 University-Shuang Ho Hospital, New Taipei City, Taiwan. <sup>8</sup>Taipei Neuroscience Institute, Taipei  
506 Medical University, Taipei City, Taiwan. <sup>9</sup>Division of Neurosurgery, Department of Surgery, Wan  
507 Fang Hospital, Taipei Medical University, Taipei City, Taiwan. <sup>10</sup>Department of Physical Medicine  
508 and Rehabilitation, Wan Fang Hospital, Taipei Medical University, Taipei City, Taiwan. <sup>11</sup>Transport  
509 Research Institute, Edinburgh Napier University, Edinburgh, Scotland. <sup>12</sup>Department of  
510 Epidemiology, Biostatistics, and Population Health, Faculty of Medicine, Public Health and  
511 Nursing, Universitas Gadjah Mada, Yogyakarta City, Indonesia, <sup>13</sup>Department of Occupational  
512 Medicine, Chang Gung Memorial Hospital, Linkou branch, Taoyuan, Taiwan.

513 **References:**

- 514 1. World Health Organization. Regional Office for E. Walking and cycling: latest evidence to  
515 support policy-making and practice. Copenhagen: World Health Organization. Regional Office for  
516 Europe; 2022 2022.
- 517 2. Kjeldgård L, Ohlin M, Elrud R, Stigson H, Alexanderson K, Friberg E. Bicycle crashes and  
518 sickness absence - a population-based Swedish register study of all individuals of working ages.  
519 BMC Public Health. 2019;19(1):943.
- 520 3. Venkatraman V, Richard CM, Magee K, Johnson K. Countermeasures That Work: A  
521 Highway Safety Countermeasure Guide for State Highway Safety Offices, 10th Edition, 2020.  
522 2021(DOT HS 813 097).
- 523 4. Allen-Munley C, Daniel J, Dhar S. Logistic Model for Rating Urban Bicycle Route Safety.  
524 Transportation Research Record. 2004;1878(1):107-15.
- 525 5. Kaplan JA. Characteristics of the Regular Adult Bicycle User. Final Report1975.
- 526 6. Rivara FP, Thompson DC, Thompson RS. Epidemiology of bicycle injuries and risk factors  
527 for serious injury. Injury Prevention. 1997;3(2):110-4.
- 528 7. Wanvik PO. Effects of road lighting: an analysis based on Dutch accident statistics 1987-  
529 2006. Accident Analysis & Prevention 2009;41(1):123-8.
- 530 8. Elvik R, Sundfør HB. How can cyclist injuries be included in health impact economic  
531 assessments? Journal of Transport & Health. 2017;6:29-39.
- 532 9. Aertsens J, de Geus B, Vandenbulcke G, Degraeuwe B, Broekx S, De Nocker L, et al.  
533 Commuting by bike in Belgium, the costs of minor accidents. Accident Analysis & Prevention.  
534 2010;42(6):2149-57.
- 535 10. Scholten AC, Polinder S, Panneman MJ, Van Beeck EF, Haagsma JA. Incidence and costs of  
536 bicycle-related traumatic brain injuries in the Netherlands. Accident Analysis & Prevention.  
537 2015;81:51-60.
- 538 11. Traffic Safety Facts - Bicyclists and Other Cyclists.  
539 <https://crashstats.nhtsa.dot.gov/Api/Public/ViewPublication/813322>: National Highway Traffic  
540 Safety Administration; 2020.
- 541 12. Bil M, Bilova M, Muller I. Critical factors in fatal collisions of adult cyclists with automobiles.  
542 Accident Analysis & Prevention 2010;42(6):1632-6.
- 543 13. Moore DN, Schneider Wht, Savolainen PT, Farzaneh M. Mixed logit analysis of bicyclist  
544 injury severity resulting from motor vehicle crashes at intersection and non-intersection locations.  
545 Accident Analysis & Prevention. 2011;43(3):621-30.
- 546 14. Wachtel A, Lewiston D. Risk factors for bicycle-motor vehicle collisions at intersections.  
547 Institute of Transportation Engineers. 1994;64(9):30-5.
- 548 15. Ugan J, Abdel-Aty M, Cai Q, Mahmoud N, Al-Omari Me. Effect of Various Speed  
549 Management Strategies on Bicycle Crashes for Urban Roads in Central Florida. Transportation  
550 Research Record: Journal of the Transportation Research Board. 2021;2676:036119812110366.
- 551 16. Meuleners LB, Fraser M, Johnson M, Stevenson M, Rose G, Oxley J. Characteristics of the  
552 road infrastructure and injurious cyclist crashes resulting in a hospitalisation. Accident Analysis &  
553 Prevention. 2020;136:105407.
- 554 17. Robartes E, Chen TD. The effect of crash characteristics on cyclist injuries: An analysis of  
555 Virginia automobile-bicycle crash data. Accident Analysis & Prevention. 2017;104:165-73.

- 556 18. Pai C-W. Overtaking, rear-end, and door crashes involving bicycles: An empirical  
557 investigation. *Accident Analysis & Prevention*. 2011;43(3):1228-35.
- 558 19. Debnath AK, Haworth N, Schramm A, Heesch KC, Somoray K. Factors influencing  
559 noncompliance with bicycle passing distance laws. *Accident Analysis & Prevention*.  
560 2018;115:137-42.
- 561 20. Vandenbrouckel JP, von Elm E, Altman DG, Gotzsche PC, Mulrow CD, Pocock SJ, et al.  
562 Strengthening the Reporting of Observational Studies in Epidemiology (STROBE): explanation and  
563 elaboration. *PLoS Medicine*. 2007;4(10):1628-55.
- 564 21. Watson A, Watson B, Vallmuur K. Estimating under-reporting of road crash injuries to  
565 police using multiple linked data collections. *Accident Analysis & Prevention*. 2015;83:18-25.
- 566 22. Maldonado G, Greenland S. Simulation study of confounder-selection strategies.  
567 *American Journal of Epidemiology*. 1993;138(11):923-36.
- 568 23. Liu J, Jones S, Adanu EK, Li X. Behavioral pathways in bicycle-motor vehicle crashes: From  
569 contributing factors, pre-crash actions, to injury severities. *The Journal of Safety Research*.  
570 2021;77:229-40.
- 571 24. Marshall R, Summerskill S, editors. An objective methodology for blind spot analysis of  
572 HGVs using a DHM approach. DS 87-8 Proceedings of the 21st International Conference on  
573 Engineering Design (ICED 17) Vol 8: Human Behaviour in Design, Vancouver, Canada, 21-2508  
574 2017; 2017.
- 575 25. Frings D, Rose A, Ridley AM. Bicyclist fatalities involving heavy goods vehicles: Gender  
576 differences in risk perception, behavioral choices, and training. *Traffic Injury Prevention*.  
577 2012;13(5):493-8.
- 578 26. Chew EL-W, Stephens A. Human Factors That Impact HGV Drivers From Being Aware of  
579 VRUs Through Direct and Indirect Vision Mechanisms.
- 580 27. Walker I. Signals are informative but slow down responses when drivers meet bicyclists  
581 at road junctions. *Accident Analysis & Prevention* 2005;37(6):1074-85.
- 582 28. Kay JJ, Savolainen PT, Gates TJ, Datta TK. Driver behavior during bicycle passing  
583 maneuvers in response to a Share the Road sign treatment. *Accident Analysis & Prevention*.  
584 2014;70:92-9.
- 585 29. Anstey KJ, Horswill MS, Wood JM, Hatherly C. The role of cognitive and visual abilities as  
586 predictors in the Multifactorial Model of Driving Safety. *Accident Analysis & Prevention*  
587 2012;45:766-74.
- 588 30. Kandasamy D, Betz ME, DiGuseppi C, Mielenz TJ, Eby DW, Molnar LJ, et al. Self-reported  
589 health conditions and related driving reduction in older drivers. *Occupational Therapy in Health*  
590 *Care*. 2018;32(4):363-79.
- 591 31. Laosee O, Rattanapan C, Somrongthong R. Physical and cognitive functions affecting road  
592 traffic injuries among senior drivers. *Archives of Gerontology and Geriatrics* 2018;78:160-4.
- 593 32. Cicchino JB, Wells JK, McCartt AT. Survey about pedestrian safety and attitudes toward  
594 automated traffic enforcement in Washington, D.C. *Traffic Injury Prevention*. 2014;15(4):414-23.
- 595 33. Kostyniuk LP, Molnar LJ. Self-regulatory driving practices among older adults: health, age  
596 and sex effects. *Accident Analysis & Prevention*. 2008;40(4):1576-80.
- 597 34. Zhang J, Lindsay J, Clarke K, Robbins G, Mao Y. Factors affecting the severity of motor  
598 vehicle traffic crashes involving elderly drivers in Ontario. *Accident Analysis & Prevention*  
599 2000;32(1):117-25.

- 600 35. Edwards JD, Ross LA, Wadley VG, Clay OJ, Crowe M, Roenker DL, et al. The useful field of  
601 view test: normative data for older adults. *Archives of Clinical Neuropsychology*. 2006;21(4):275-  
602 86.
- 603 36. W.~Hunter W, Stewart JR. An Evaluation of Bike Lanes Adjacent to Motor Vehicle Parking.  
604 1999.
- 605 37. Huang C-Y. Observations of Drivers' Behavior when Opening Car Doors. *Procedia*  
606 *Manufacturing*. 2015;3:2753-60.
- 607 38. Kim D-G, Washington S, Oh J. Modeling crash types: New insights into the effects of  
608 covariates on crashes at rural intersections. *Journal of Transportation Engineering*.  
609 2006;132(4):282-92.
- 610 39. Pai C-W, Saleh W. Modelling motorcyclist injury severity by various crash types at T-  
611 junctions in the UK. *Safety Science*. 2008;46(8):1234-47.
- 612 40. Pai C-W, Jou R-C. Cyclists' red-light running behaviours: An examination of risk-taking,  
613 opportunistic, and law-obeying behaviours. *Accident Analysis & Prevention*. 2014;62:191-8.

614

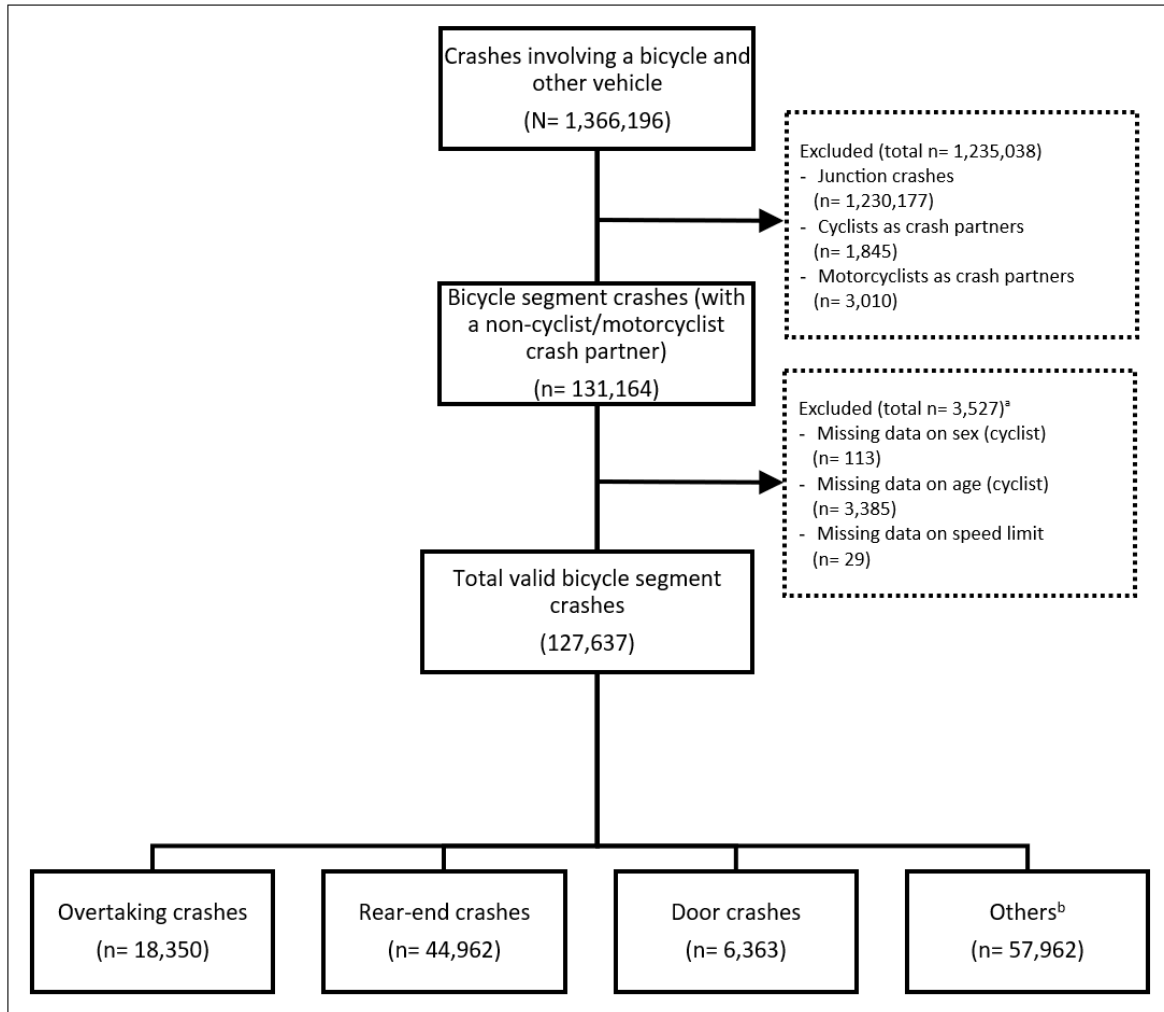

**Fig. 1.** Flowchart of the study sample selection process. <sup>a</sup>Listed excluded criteria are nonexclusive; thus, the sum of the total may exceed 3,527. <sup>b</sup>Other crashes include reversing crashes and head-on crashes.

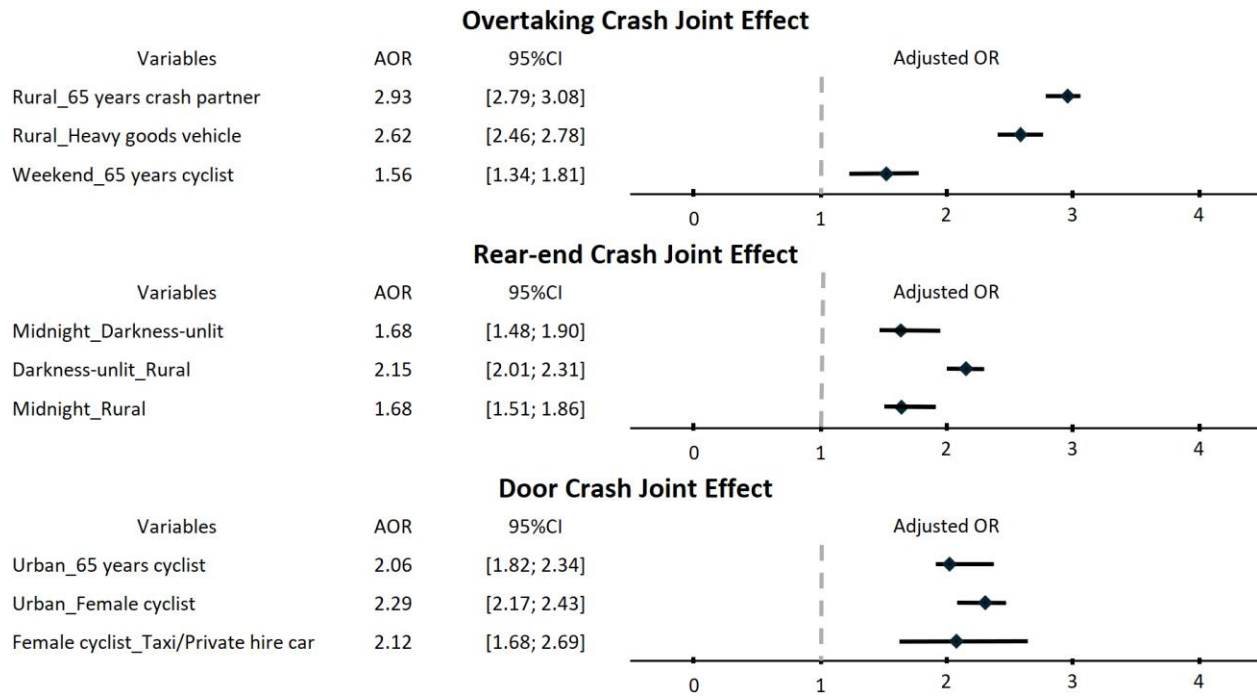

**Fig. 2.** Joint effects of several variables on the three crash types.



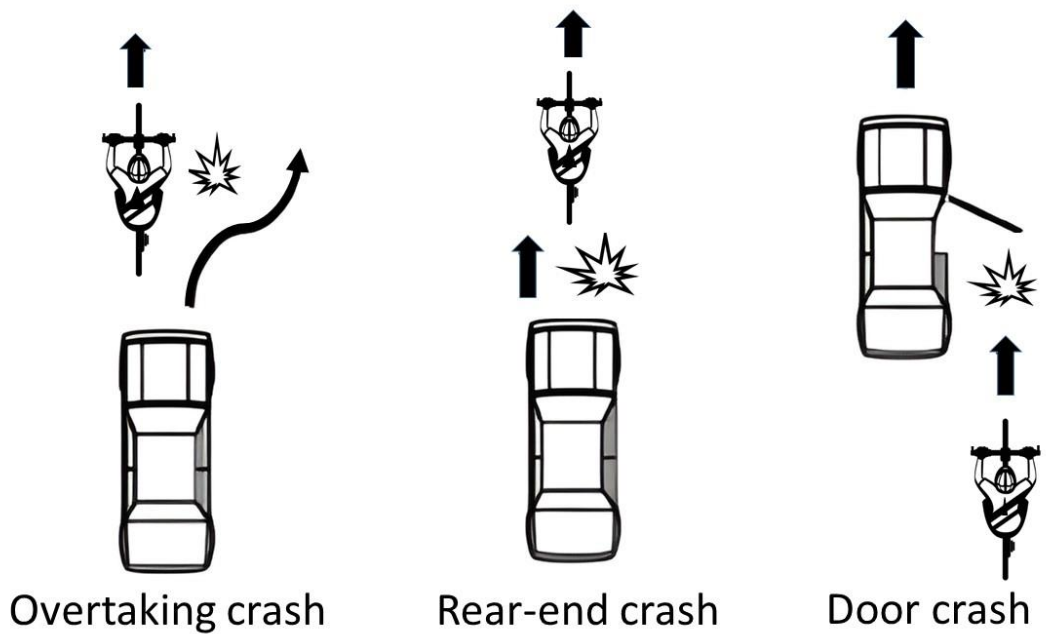

**Figure 2.** Illustrative diagram of the three crash types



**Fig. 3.** Joint effects of several variables on the three crash types.



Figure 2. Illustrative diagram of the three crash types

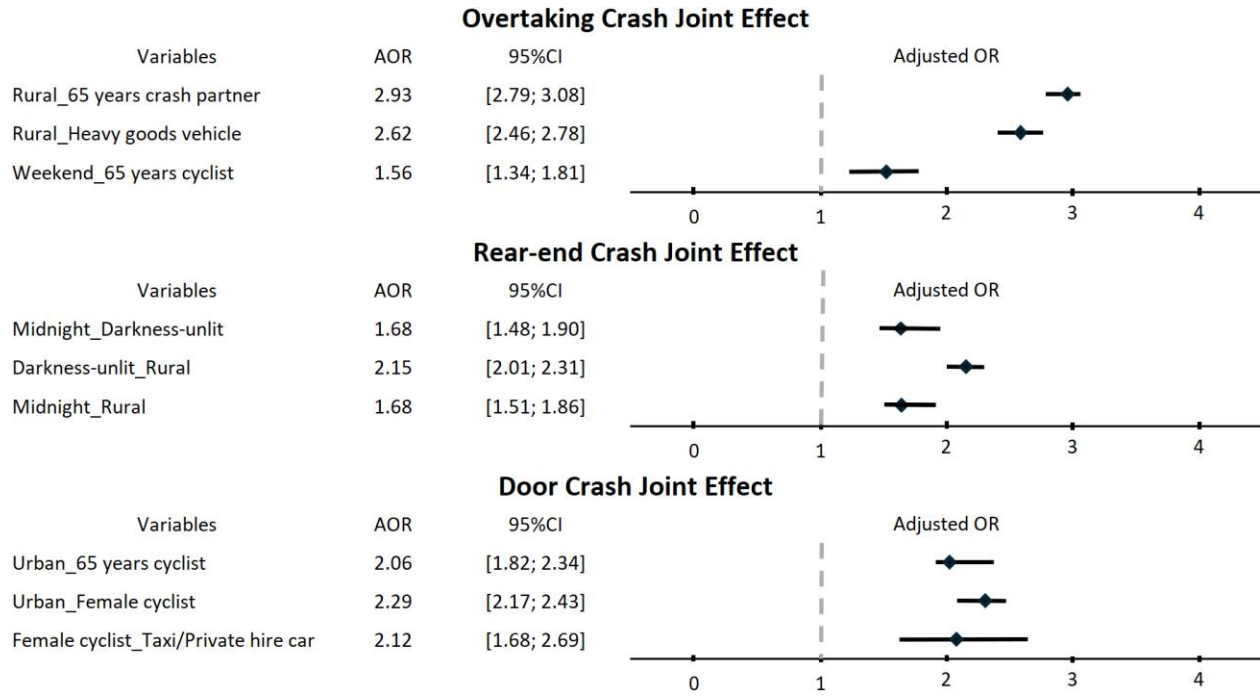

**Figure. 3.** Joint effects of several variables on the three crash types.

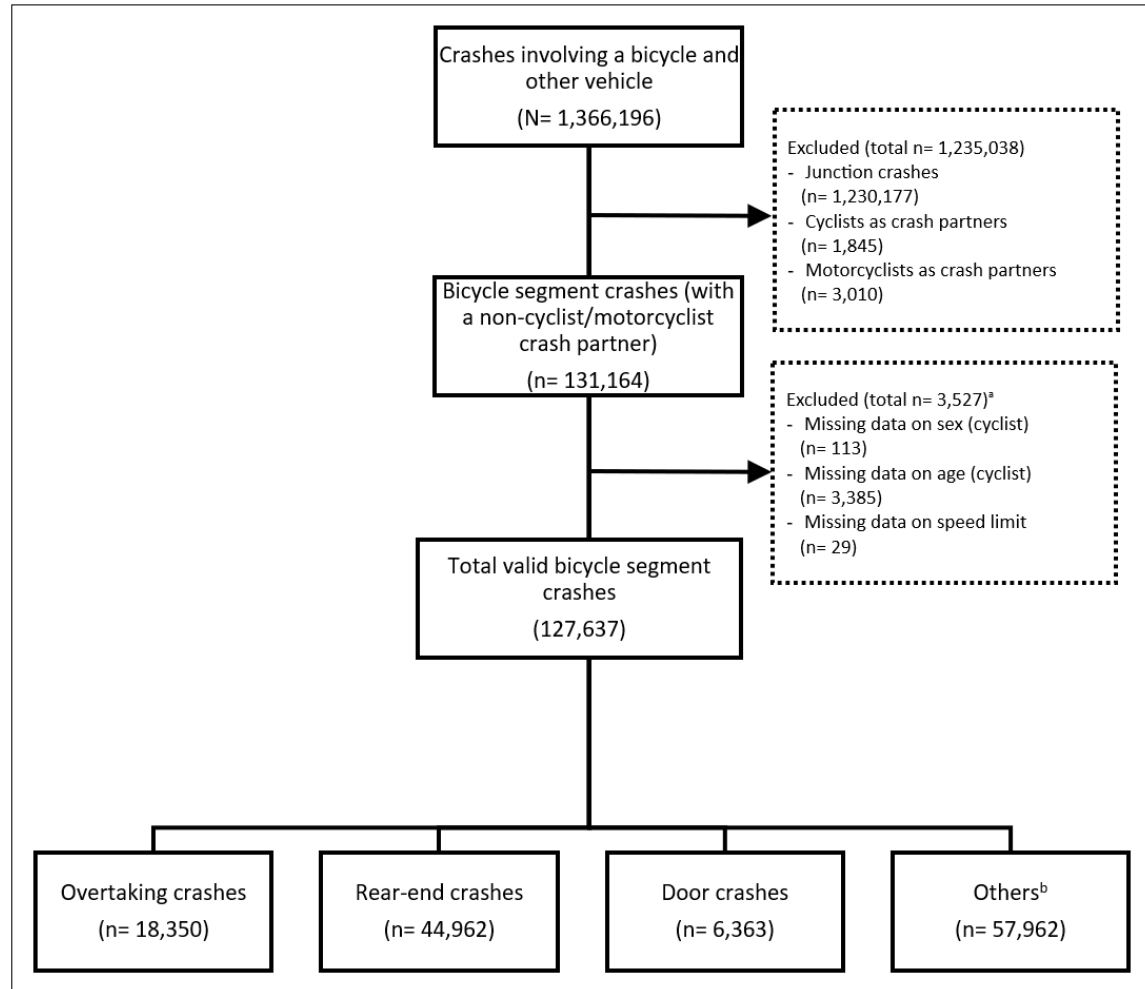

**Figure 1.** Flowchart of the study sample selection process.

<sup>a</sup>Listed excluded criteria are nonexclusive; thus, the sum of the total may exceed 3,527.

<sup>b</sup>Other crashes include reversing crashes and head-on crashes.

1 **Risk Factors for Overtaking, Rear-End, and Door Crashes Involving Bicycles in the United**  
2 **Kingdom: Revisited and Reanalysed**  
3

4 **Chun-Chieh Chao<sup>1,2,3†</sup>, Hon-Ping Ma<sup>1,3,7</sup>, Li Wei<sup>1,8,9</sup>, Yen-Nung Lin<sup>1,10</sup>, Chenyi Chen<sup>1</sup>, Wafaa Saleh<sup>11</sup>, Bayu Satria**  
5 **Wiratama<sup>12</sup>, Akhmad Fajri Widodo<sup>1</sup>, Shou-Chien Hsu<sup>6,13</sup>, Shih Yu Ko<sup>7</sup>, Hui-An Lin<sup>1,2,3†</sup>, Cheng-Wei Chan<sup>1,4,5,6†</sup>, Chih-**  
6 **Wei Pai<sup>1\*</sup>**

7 <sup>1</sup>Graduate Institute of Injury Prevention and Control, College of Public Health, Taipei Medical University, Taipei  
8 City, Taiwan, <sup>2</sup> Department of Emergency Medicine, Taipei Medical University Hospital, Taipei City, Taiwan, <sup>3</sup>  
9 Department of Emergency Medicine, School of Medicine, College of Medicine, Taipei Medical University, Taipei,  
10 Taiwan, <sup>4</sup> Department of Emergency Medicine, New Taipei City Hospital, New Taipei City, Taiwan, <sup>5</sup> College of  
11 Medicine, Chang Gung University, Taoyuan City, Taiwan, <sup>6</sup> Department of Emergency Medicine, Chang Gung  
12 Memorial Hospital, Linkou branch, Taoyuan, Taiwan, <sup>7</sup> Department of Emergency Medicine, Taipei Medical  
13 University-Shuang Ho Hospital, New Taipei City, Taiwan, <sup>8</sup> Taipei Neuroscience Institute, Taipei Medical University,  
14 Taipei, Taiwan, <sup>9</sup> Division of Neurosurgery, Department of Surgery, Wan Fang Hospital, Taipei Medical University,  
15 Taipei, Taiwan, <sup>10</sup> Department of Physical Medicine and Rehabilitation, Wan Fang Hospital, Taipei Medical  
16 University, Taipei, Taiwan, <sup>11</sup> Transport Research Institute, Edinburgh Napier University, Edinburgh, Scotland, <sup>12</sup>  
17 Department of Epidemiology, Biostatistics, and Population Health, Faculty of Medicine, Public Health and Nursing,  
18 Universitas Gadjah Mada, Yogyakarta City, Indonesia, <sup>13</sup> Department of Occupational Medicine, Chang Gung  
19 Memorial Hospital, Linkou branch, Taoyuan, Taiwan.

20 \* Correspondence: cpai@tmu.edu.tw

21 † Contributed equally to this work

Formatted: Right: 0.25"

1

## 22 Abstract

23 **Background:** Relevant research has provided valuable insights into risk factors for bicycle crashes  
24 at intersections. However, few studies have focused explicitly on three common types of bicycle  
25 crashes on road segments: overtaking, rear-end, and door crashes.

Formatted: Font color: Text 1

26 **Objective:** This study aims to identify risk factors for overtaking, rear-end, and door crashes that  
27 occur on road segment.

### 28 Material and methods

29 ~~The current study examined the risk factors associated with these three types of crashes~~  
30 ~~occurring on road segments.~~ We analysed British STATS19 accident records from 1991 to 2020.

31 Using multivariate logistic regression models, we estimated adjusted odds ratios (AORs) with 95%  
32 confidence intervals (CIs) for multiple risk factors. The analysis included 127,637 bicycle crashes,  
33 categorised into 18,350 overtaking, 44,962 rear-end, 6,363 door, and 57,962 other crashes.

Formatted: Font color: Text 1

### 34 Results

35 Significant risk factors for overtaking crashes included speed limits of  $\geq 40$  miles per hour (mph)  
36 (AOR = 2.238, 95% CI = 2.159–2.320), heavy goods vehicles (HGVs) as crash partners (AOR = 2.867,  
37 95% CI 2.473–3.323), and elderly crash partners (AOR = 2.013, 95% CI = 1.937–2.092). For rear-  
38 end crashes, noteworthy risk factors included unlit darkness (AOR = 1.486, 95% CI = 1.404–1.573)  
39 and midnight hours (AOR = 1.269, 95% CI = 1.190–1.354). Factors associated with door crashes  
40 included speed limits of 20–30 mph (AOR = 16.185, 95% CI = 13.514–19.382) and taxi and private  
41 hire cars (AOR = 2.695, 95% CI = 2.310–3.145). Our joint-effect analysis revealed additional  
42 interesting results; for example, there were elevated risks for overtaking crashes in rural areas  
43 with elderly drivers as crash partners (AOR = 2.93, 95% CI = 2.79–3.08) and with HGVs as crash

Formatted: Right: 0.25"

44 partners (AOR = 2.62, 95% CI = 2.46–2.78).

45

## 46 **Conclusions**

47 The aforementioned risk factors remained largely unchanged since 2011, when we conducted  
48 our previous study. However, the present study concluded that the detrimental effects of certain  
49 variables became more pronounced in certain situations. For example, cyclists in rural settings  
50 exhibited an elevated risk of overtaking crashes involving HGVs as crash partners.

51

52 **Keywords:** Bicycle crash; Road segment; Overtaking crash; Rear-end crash; Door crash

53

54

## 55 **Introduction**

56 In recent years, urban bicycling has become increasingly popular in many countries, offering  
57 benefits such as reduced traffic congestion, diminished parking pressure, and a reduction in  
58 greenhouse gas emissions [1, 2]. The World Health Organization has highlighted numerous health  
59 advantages of moderate-intensity physical activities such as bicycling, including improvements in  
60 life expectancy, quality of life, cognitive function, mental health, sleep quality, muscular and  
61 cardiorespiratory fitness, and bone and functional health [2].

62 However, despite such health benefits, the risk of injury remains a considerable safety  
63 concern for cyclists, who are regarded as vulnerable road users [2, 3]. Traffic crash data indicate  
64 that the risk of accidents for cyclists, measured per distance travelled, is approximately 20 times  
65 higher than that for vehicle drivers[2]. To address this problem, researchers in the United States

Formatted: Right: 0.25"



66 developed a comprehensive bicycle route safety rating model with a focus on injury severity [4].  
67 This model evaluates multiple operational and physical aspects such as traffic volume, population  
68 density, highway classification, lane width, and the presence of one-way streets. In addition, it is  
69 capable of predicting the severity of injuries due to motor vehicle–related crashes at specific  
70 locations [4]. Another finding was that a route is considered adequately safe if it includes  
71 geometric factors that enhance safety [4]. This model can aid urban planners and public officials  
72 in creating infrastructure such as bike lanes and implementing strict lane policies to improve  
73 cyclist safety [4]. Implementing bike lanes has been demonstrated to reduce crash rates by up to  
74 40% among adult cyclists [5]. One study regarding roundabouts indicated that roundabouts with  
75 cycle tracks significantly reduced injury risk for cyclists compared with those lacking bicycle  
76 infrastructure [6]. Furthermore, adequate night-time lighting on rural roads has the potential to  
77 prevent over half of all cyclist injuries [7]. Bicycle crashes can also impose a significant burden on  
78 healthcare expenses. Elvik and Sundfør [8] have discussed the economic implications and  
79 healthcare expenditures associated with bicycle accidents. For instance, in Belgium, the average  
80 cost of bicycle accidents per case is estimated at 841 euros [9]. In the Netherlands, the total  
81 annual cost has been reported as €410.7 million [10].

82 Although intersectional crashes are generally more frequent than nonintersectional ones, in  
83 2020, 64% of fatal crashes involving cyclists occurred on road segments, defined as areas 20 m  
84 away from intersections, whereas only 26% of such fatalities occurred at intersections [11]. Bil et  
85 al. demonstrated that car drivers, when at fault for crashes, often cause more serious  
86 consequences for cyclists on straight road sections [12]. In crashes occurring on road segments,  
87 several factors contribute to high injury severity, including being in a rural region with an elevated

Formatted: Font color: Text 1

Formatted: Right: 0.25"

88 speed limit, male gender, and cyclist age of >55 years [13]. Another identified risk factor is  
89 bicycling on roads against oncoming traffic [14].

90 Although relevant research has shed light on risk factors for bicycle crashes at intersections,  
91 few studies have explicitly investigated crashes on road segments. Bicycle crashes on road  
92 segments remain a substantial issue for public health concern. Existing research primarily  
93 emphasizes intersection-related crashes. This study aims to fill a critical gap by conducting a  
94 thorough examination of the risk factors associated with three distinct bicycle crash types:  
95 overtaking, rear-end, and door crashes that occur on road segments. Studies that have examined  
96 bicycle crashes relatively broadly, without distinguishing crash types, have identified several key  
97 factors—including vehicle volume [15], traffic density [16], number of lanes [16], access points  
98 along road segments [15], shoulder and median widths [15], parking space availability [15, 16] ,  
99 length of continuous two-way left-turn lanes [15], and pavement type [17]—all of which  
100 contribute to bicycle crashes on road segments. Several studies have specifically explored  
101 overtaking, rear end, and door crashes involving bicycles. The primary objective of this study,  
102 building on our previous research, two exceptional work have examined into risk factors related  
103 to for overtaking, rear-end, and door crashes, is to conduct a more comprehensive investigation.  
104 [18, 19]. Specifically, Pai identified buses and coaches as common crash partners in overtaking  
105 crashes, poor visibility, traversing manoeuvres, and teenage cyclists as risk factors for rear-end  
106 crashes, and built-up areas as a risk factor for door crashes [18]. In addition, another study linked  
107 the speed of a passing vehicle to increased severity of cyclist injury in overtaking crashes [19].

108 The primary objective of the present study, an extension of our previous study [18], was to  
109 analyse police-reported crash data from additional years to determine whether the risk factors

Formatted: Font color: Text 1

Formatted: Right: 0.25"

110 for these three crash types remained unchanged. The study addresses a critical gap in current  
111 research, focusing on crashes specifically occurring on road segments. Existing literature offers  
112 limited insights into ~~this specific type of crash~~ these crash types, highlighting a crucial need for  
113 targeted investigations. These crashes have the potential for severe impacts, involving complex  
114 dynamics that demand a nuanced understanding for effective mitigation strategies. By exploring  
115 these factors, our research aims to significantly enhance cyclist safety within this particular  
116 context. Furthermore, we aimed to untangle the joint associations of several factors—including  
117 light conditions, urban versus rural settings, vehicle types, and rider and driver characteristics—  
118 with these three crash types.

Formatted: Font color: Text 1

119

## 120 **Material and Methods**

### 121 **Crash data source**

122 The present investigation utilised data from 01/01/1991 to 31/12/2020, obtained from the  
123 United Kingdom's official road traffic casualty database, STATS19. Police record such data either  
124 at crash scenes or within 30 days of each crash. The UK's Department for Transport compiles the  
125 data, which the United Kingdom Data Archive then maintains and distributes. The dataset  
126 encompasses a variety of variables, including crash circumstances (e.g., time and date, weather  
127 conditions, road and light conditions, posted speed limit, road type), vehicle and driver  
128 characteristics, demographic details of the drivers, precrash manoeuvres of the vehicles, and the  
129 initial impact point of the vehicle. Additionally, the dataset contains demographic information  
130 and details regarding injury severity for each casualty. This study adhered to the STROBE  
131 (strengthening the reporting of observational studies in epidemiology) reporting guidelines. [20]

Formatted: Right: 0.25"

132 Injury severity in the aforementioned dataset is divided into three categories, namely slight,  
133 serious, and fatal. Fatal injuries refer to those leading to death within 30 days of the accident.  
134 Serious injuries include conditions such as fractures, internal injuries, severe cuts and lacerations,  
135 concussions, and any injury requiring hospitalisation. Slight injuries include sprains, bruises, and  
136 minor cuts, as well as mild shock requiring roadside attention. The exclusive focus of this study  
137 was crashes leading to cyclist casualties.

138 As shown in Figure 1, this study analysed 1,366,196 crashes involving bicycles and other  
139 vehicles. Initially, 1,235,032 junction cases were excluded. From the remaining 131,164 bicycle  
140 segment crashes, 3,527 were further excluded because of incomplete demographic data for the  
141 cyclist and missing speed limit information, leaving a valid cohort of 127,637 bicycle segment  
142 crashes for analysis. Within this cohort, this study identified 18,350 overtaking crashes, 44,962  
143 rear-end crashes, 6,363 door crashes, and 57,962 other types of crashes.

Formatted: Right: 0.25"

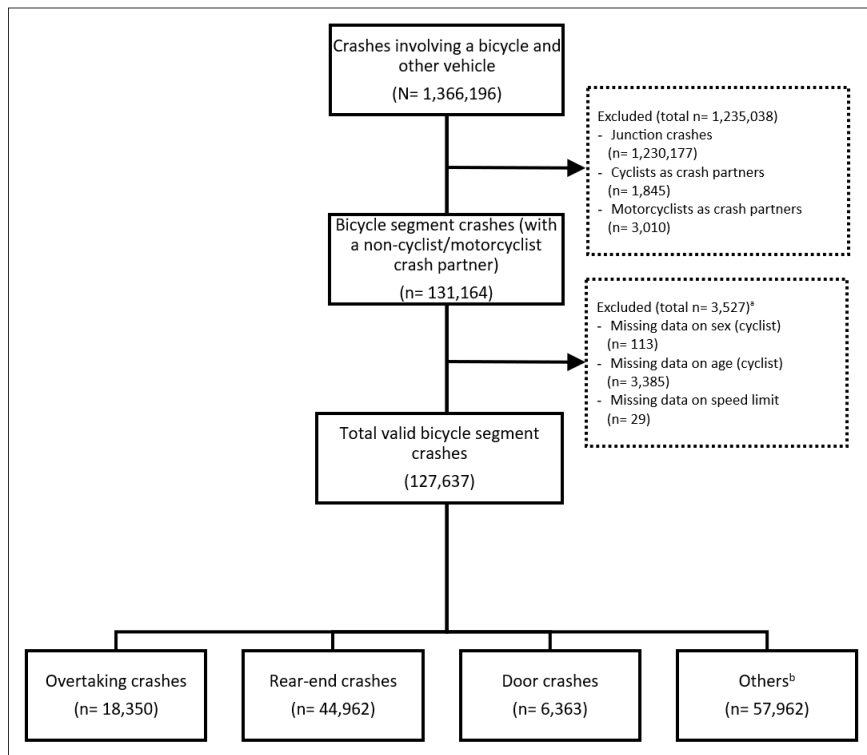

144

145 **Figure 1.** Flowchart of the study sample selection process. <sup>a</sup>Listed excluded criteria are nonexclusive; thus, the  
 146 sum of the total may exceed 3,527. <sup>b</sup>Other crashes include reversing crashes and head-on crashes.

147

148 **Classification of crash types**

149 As shown in [Figure 2](#), an overtaking crash is defined as a crash where a motorised vehicle  
 150 overtakes and impacts with a bicycle, which may be travelling straight, overtaking another vehicle,  
 151 changing lanes, or turning. A rear-end crash occurs when a following vehicle impacts with the  
 152 rear of a bicycle. A door crash involves a bicycle either being struck by or striking the opening  
 153 door of an automobile. These three crash types were described using schematics in our previous  
 154 study [18].

Formatted: Right: 0.25"

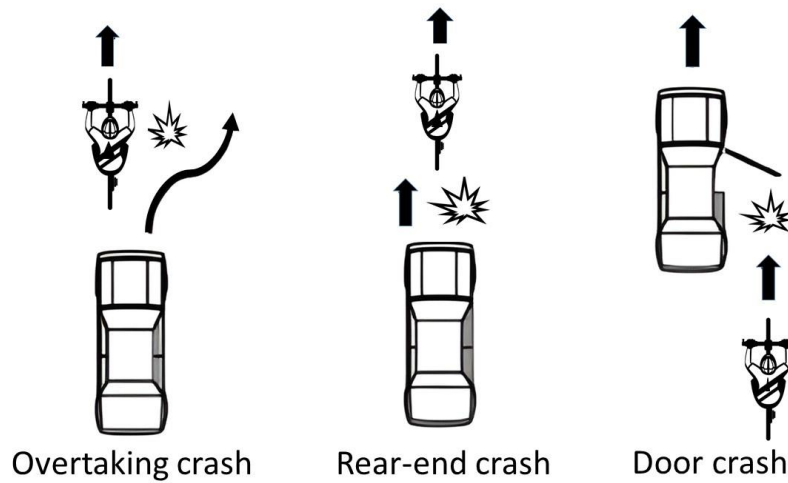

Figure 2. Illustrative diagram of the three crash types

Formatted: Font: (Default) +Headings (Calibri), 10 pt

Formatted: Centered

### Data collection

For the present study, the three crash types of focus (overtaking, rear-end, and door crashes) were the binary-dependent variables. The collected data encompassed the following factors: lighting conditions on the roadway at the time of the crash (daylight, darkness-lit, darkness-unlit), the speed limit at the crash scene (rural:  $\geq 40$  miles per hour [mph]; urban: 20–30 mph), the time of day categorised into four periods according to traffic volume (midnight: 00:00–06:00; rush hours: 07:00–08:00 and 17:00–18:00; nonrush hours: 09:00–16:00; and evening: 19:00–23:00), and the day of the week (weekday or weekend day). The demographic details of cyclist casualties encompassed age ( $\leq 18$ , 19–40, 41–64, or  $\geq 65$  years) and sex (male or female). Finally, the demographic details of the crash partner included the type of vehicle (identified as a taxi, private hire car, car, bus, or heavy goods vehicle [HGV]), age ( $\leq 18$ , 19–40, 41–64, or  $\geq 65$  years) and sex (male or female). On a cautionary note, we removed junction cases to avoid the variability

Formatted: Font color: Text 1

Formatted: Right: 0.25"



189 estimated, and  $X_1, X_2, \dots, X_p$  represent the predictor variables.

190 Before estimating the model, assumptions of logistic regression, such as linearity of the logit,  
191 absence of multicollinearity, and independence of observations, were evaluated. An odds ratio  
192 (OR) greater than 1 indicated a positive association between the independent variable and the  
193 occurrence rate, while an OR less than 1 indicated a negative association. An OR of 1 suggested  
194 no association between the variables of interest and the outcomes. All statistical analyses were  
195 conducted using SPSS Statistics version 25 for Windows (IBM Corp., Armonk, New York, USA). A  
196  $p$  value lower than 0.05 in two-tailed tests was considered statistically significant.

197

## 198 **Results**

### 199 **Population characteristics**

200 Tables 1, 2, and 3 present the distributions of overtaking, rear-end, and door crashes, respectively,  
201 in relation to multiple independent variables. These data revealed that a significant proportion  
202 of bicycle crashes occurred in daylight (82.3%), occurred in urban settings (78.5%), occurred  
203 during nonrush hours (48.3%), occurred on weekdays (77.5%), involved cyclists aged under 18  
204 years (40.1%), and involved male cyclists (81.3%). Additionally, most crashes involved cars as  
205 crash partners (83.6%), and crash partners were predominately aged 19–40 years (38.5%) and  
206 were male (76.4%). Table 1 highlights an overrepresentation in bicycle overtaking crashes for  
207 certain variables, namely unlit darkness (19.5%), rural areas (24.8%), midnight hours (17.7%),  
208 buses or HGVs as crash partners (24.7%), and elderly crash partners (21.5%) and male crash  
209 partners (16.0%). These results were revealed to be statistically significant by the chi-squared

Formatted: Right: 0.25"



210 test ( $p < 0.01$ ).

211

212 **Table 1.** Distribution of overtaking crashes according to a set of independent variables

| Variable                                  | Total<br>(n=127,637) | Overtaking<br>crashes<br>(n=18,350) | Non-overtaking<br>crashes<br>(n=109,287) | $\chi^2$ test<br>p value |
|-------------------------------------------|----------------------|-------------------------------------|------------------------------------------|--------------------------|
| <b>Light conditions, n (%)</b>            |                      |                                     |                                          | <0.001                   |
| Daylight                                  | 105,053 (82.3%)      | 15,283 (14.55%)                     | 89,770 (85.5%)                           |                          |
| Darkness-lit                              | 16,543 (13.0%)       | 1,889 (11.42%)                      | 14,654 (88.6%)                           |                          |
| Darkness-unlit                            | 6,041 (4.7%)         | 1,178 (19.50%)                      | 4,863 (80.5%)                            |                          |
| <b>Speed limit, n (%)</b>                 |                      |                                     |                                          | <0.001                   |
| Rural ( $\geq 40$ mph)                    | 27,395 (21.5%)       | 6,805 (24.8%)                       | 20,590 (75.6%)                           |                          |
| Urban (20–30 mph)                         | 100,242 (78.5%)      | 11,545 (11.5%)                      | 88,697 (88.5%)                           |                          |
| <b>Crash time (h), n (%)</b>              |                      |                                     |                                          | <0.001                   |
| Midnight (00:00–06:00)                    | 4,810 (3.8%)         | 852 (17.7%)                         | 3,958 (82.3%)                            |                          |
| Rush hours (07:00–08:00/17:00–18:00)      | 41,619 (32.6%)       | 5,685 (13.7%)                       | 35,934 (86.3%)                           |                          |
| Nonrush hours (09:00–16:00)               | 61,696 (48.3%)       | 9,386 (15.2%)                       | 52,310 (84.8%)                           |                          |
| Evening (19:00–23:00)                     | 19,512 (15.3%)       | 2,427 (12.4%)                       | 17,085 (87.6%)                           |                          |
| <b>Crash day, n (%)</b>                   |                      |                                     |                                          | 0.094                    |
| Weekend                                   | 28,730 (22.5%)       | 4,218 (14.7%)                       | 24,512 (85.2%)                           |                          |
| Weekday                                   | 98,907 (77.5%)       | 14,132 (14.3%)                      | 84,775 (85.7%)                           |                          |
| <b>Cyclist's age (years), n (%)</b>       |                      |                                     |                                          | <0.001                   |
| $\leq 18$                                 | 51,193 (40.1%)       | 5,220 (10.2%)                       | 45,973 (89.8%)                           |                          |
| 19–40                                     | 45,760 (35.9%)       | 7,108 (15.5%)                       | 38,652 (84.5%)                           |                          |
| 41–64                                     | 26,052 (20.4%)       | 5,012 (19.2%)                       | 21,040 (80.8%)                           |                          |
| $\geq 65$                                 | 4,632 (3.6%)         | 1,010 (21.8%)                       | 3,622 (78.2%)                            |                          |
| <b>Cyclist's sex, n (%)</b>               |                      |                                     |                                          | <0.001                   |
| Male                                      | 103,766 (81.3%)      | 14,746 (14.2%)                      | 89,020 (85.8%)                           |                          |
| Female                                    | 23,871 (18.7%)       | 3,604 (15.1%)                       | 20,267 (84.9%)                           |                          |
| <b>Crash partner, n (%)</b>               |                      |                                     |                                          | <0.001                   |
| Taxi/Private hire car                     | 2,588 (2.0%)         | 208 (8.0%)                          | 2,380 (92.0%)                            |                          |
| Car                                       | 106,668 (83.6%)      | 13,599 (12.8%)                      | 93,069 (87.3%)                           |                          |
| Bus/Heavy goods vehicle                   | 18,381 (14.4%)       | 4,543 (24.7%)                       | 13,838 (75.3%)                           |                          |
| <b>Crash partner's age (years), n (%)</b> |                      |                                     |                                          | <0.001                   |
| $\leq 18$                                 | 2,415 (1.9%)         | 281 (11.6%)                         | 2,134 (88.4%)                            |                          |
| 19–40                                     | 49,103 (38.5%)       | 5,398 (11.0%)                       | 43,705 (89.0%)                           |                          |
| 41–64                                     | 35,598 (27.9%)       | 3,973 (11.2%)                       | 31,625 (88.8%)                           |                          |
| $\geq 65$                                 | 40,521 (31.8%)       | 8,698 (21.5%)                       | 31,823 (78.5%)                           |                          |
| <b>Crash partner's sex, n (%)</b>         |                      |                                     |                                          | <0.001                   |
| Male                                      | 97,447 (76.4%)       | 15,584 (16.0%)                      | 81,863 (84.0%)                           |                          |
| Female                                    | 30,190 (23.8%)       | 2,766 (9.2%)                        | 27,424 (90.8%)                           |                          |

213

214 Several variables in Table 2 reveal significant differences between rear-end crashes and non-  
215 rear-end crashes. Specifically, a higher proportion of rear-end crashes occurred under darkness-  
216 unlit conditions (50.2%) compared to darkness-lit conditions (37.5%). Additionally, rear-end  
217 crashes were more prevalent in rural areas with speed limits of  $\geq 40$  mph (43.0%) compared to

Formatted: Font color: Text 1

Formatted: Right: 0.25"

218 urban areas with speed limits of 20–30 mph (33.1%). Crashes involving crash partners aged ≥ 65  
 219 accounted for 39.7% of rear-end crashes, which was higher compared to other age groups (age  
 220 41–64: 33.0% and ≤18: 36.0%). Furthermore, rear-end crashes were more likely to occur during  
 221 midnight (47.6%) compared to rush hours (36.3%). Taxis were frequently involved in rear-end  
 222 crashes (42.4%), as were male crash partners (36.8%). These findings highlight the significant  
 223 influence of various factors on the likelihood of rear-end crashes. Variables such as darkness-unlit  
 224 conditions, higher speed limits in rural areas, crash time, and characteristics of the crash partner  
 225 all emerged as significant determinants. Specifically, rear-end crashes were notably more  
 226 prevalent under darkness-unlit conditions, in rural areas with higher speed limits, during  
 227 midnight hours, and involving certain characteristics of crash partners. Importantly, these  
 228 associations were statistically significant, as indicated by the Chi-squared test ( $p < 0.001$ ).

230 **Table 2.** Distribution of rear-end crashes according to a set of independent variables

| Variable                                  | Total<br>(n=127,637) | Rear-end<br>crashes<br>(n=44,962) | Non-rear-end<br>crashes<br>(n=82,675) | $\chi^2$ test<br>p value |
|-------------------------------------------|----------------------|-----------------------------------|---------------------------------------|--------------------------|
| <b>Light conditions, n (%)</b>            |                      |                                   |                                       | <0.001                   |
| Daylight                                  | 105,053 (82.3%)      | 35,726 (34.1%)                    | 69,333 (66.0%)                        |                          |
| Darkness-lit                              | 16,543 (13.0%)       | 6,204 (37.5%)                     | 10,339 (63.5%)                        |                          |
| Darkness-unlit                            | 6,041 (4.73%)        | 3,032 (50.19%)                    | 3,003 (49.71%)                        |                          |
| <b>Speed limit, n (%)</b>                 |                      |                                   |                                       | <0.001                   |
| Rural (≥ 40 mph)                          | 27,395 (21.5%)       | 11,788 (43.0%)                    | 15,607 (57.0%)                        |                          |
| Urban (20–30 mph)                         | 100,242 (78.5%)      | 33,174 (33.1%)                    | 67,068 (66.9%)                        |                          |
| <b>Crash time (h), n (%)</b>              |                      |                                   |                                       | <0.001                   |
| Midnight (00:00–06:00)                    | 4,810 (3.8%)         | 2,289 (47.6%)                     | 2,521 (52.4%)                         |                          |
| Rush hours (07:00–08:00/17:00–18:00)      | 41,619 (32.6%)       | 15,089 (36.3%)                    | 26,530 (63.7%)                        |                          |
| Nonrush hours (09:00–16:00)               | 61,696 (48.3%)       | 20,723 (33.6%)                    | 40,973 (66.4%)                        |                          |
| Evening (19:00–23:00)                     | 19,512 (15.3%)       | 6,861 (36.2%)                     | 12,651 (64.9%)                        |                          |
| <b>Crash day, n (%)</b>                   |                      |                                   |                                       | <0.001                   |
| Weekend                                   | 28,730 (22.5%)       | 9,485 (33.0%)                     | 19,245 (67.0%)                        |                          |
| Weekday                                   | 98,907 (77.5%)       | 35,477 (35.9%)                    | 63,430 (64.1%)                        |                          |
| <b>Cyclist's age (years), n (%)</b>       |                      |                                   |                                       | <0.001                   |
| ≤18                                       | 51,193 (40.1%)       | 13,446 (26.3%)                    | 37,747 (73.7%)                        |                          |
| 19–40                                     | 45,760 (35.9%)       | 19,102 (41.7%)                    | 26,658 (58.3%)                        |                          |
| 41–64                                     | 26,052 (20.4%)       | 10,619 (40.8%)                    | 15,433 (59.2%)                        |                          |
| ≥65                                       | 4,632 (3.6%)         | 1,795 (38.8%)                     | 2,837 (61.3%)                         |                          |
| <b>Cyclist's sex, n (%)</b>               |                      |                                   |                                       | <0.001                   |
| Male                                      | 103,766 (81.3%)      | 37,175 (35.8%)                    | 66,591 (64.2%)                        |                          |
| Female                                    | 23,871 (18.7%)       | 7,787 (32.6%)                     | 16,084 (67.4%)                        |                          |
| <b>Crash partner, n (%)</b>               |                      |                                   |                                       | <0.001                   |
| Taxi/Private hire car                     | 2,588 (2.0%)         | 1,096 (42.4%)                     | 1,492 (57.7%)                         |                          |
| Car                                       | 106,668 (83.6%)      | 37,202 (34.9%)                    | 71,342 (66.9%)                        |                          |
| Bus/Heavy goods vehicle                   | 18,381 (14.4%)       | 6,664 (36.3%)                     | 9,841 (53.5%)                         |                          |
| <b>Crash partner's age (years), n (%)</b> |                      |                                   |                                       | <0.001                   |
| ≤18                                       | 2,415 (1.9%)         | 870 (36.0%)                       | 1,545 (64.0%)                         |                          |
| 19–40                                     | 49,103 (38.5%)       | 16,282 (33.2%)                    | 32,821 (66.8%)                        |                          |
| 41–64                                     | 35,598 (27.9%)       | 11,736 (33.0%)                    | 23,862 (67.0%)                        |                          |
| ≥65                                       | 40,521 (31.8%)       | 16,074 (40.0%)                    | 24,447 (60.3%)                        |                          |
| <b>Crash partner's sex, n (%)</b>         |                      |                                   |                                       | <0.001                   |

Formatted: Right: 0.25"

|        |                |                |                |
|--------|----------------|----------------|----------------|
| Male   | 97,447 (76.6%) | 35,828 (36.8%) | 61,619 (63.2%) |
| Female | 30,190 (23.7%) | 9,134 (30.3%)  | 21,056 (69.7%) |

231  
232 As shown in Table 3, several variables can contribute to door crashes involving bicycles. Door  
233 crashes predominantly occurred in urban areas with speed limits of 20-30 mph (6.2%), while a  
234 significantly lower proportion occurred in rural areas with speed limits  $\geq$  40 mph (0.5%). These  
235 crashes were overrepresented during non-rush hours (5.5%) and rush hours (4.9%) compared to  
236 evening (4.3%) and midnight (2.4%). Cyclists were more frequently involved in door crashes on  
237 weekdays (5.4%) than weekends (3.7%). As many as 8.2% of all female cyclists were involved in  
238 door crashes, which is higher than the involvement rate among males (4.2%). Taxi and private  
239 hire cars were overinvolved in door crashes (10.6%) compared to cars (5.2%) and buses/heavy  
240 goods vehicles (3.1%). Crash partners aged  $\leq$ 18 years (5.2%) and 19-40 years (5.3%) were  
241 disproportionately involved in door crashes compared to older age groups, and female crash  
242 partners were overrepresented in door crashes (7.4%) compared to males (4.2%). These results  
243 were statistically significant, as indicated by the Chi-squared test ( $p < 0.001$ ). They suggest that  
244 various factors—including traffic conditions (rural areas, crash time), cyclist demographics  
245 (younger age, gender), and characteristics of the crash partner (taxi/private hire cars)—  
246 significantly contribute to the likelihood of door crashes involving cyclists.

247 **Table 3.** Distribution of door crashes according to a set of independent variables

| Variable                       | Total<br>(n=127,637) | Door crashes<br>(n=6,363) | Non-door<br>crashes<br>(n=121,274) | $\chi^2$ test<br>p value |
|--------------------------------|----------------------|---------------------------|------------------------------------|--------------------------|
| <b>Light conditions, n (%)</b> |                      |                           |                                    | <0.001                   |
| Daylight                       | 105,053 (82.3%)      | 5,192 (4.9%)              | 99,861 (95.1%)                     |                          |
| Darkness-lit                   | 16,543 (13.0%)       | 1,031 (6.2%)              | 15,512 (93.8%)                     |                          |
| Darkness-unlit                 | 6,041 (4.7%)         | 140 (2.3%)                | 5,901 (97.7%)                      |                          |
| <b>Speed limit, n (%)</b>      |                      |                           |                                    | <0.001                   |
| Rural ( $\geq$ 40 mph)         | 27,395 (21.5%)       | 123 (0.5%)                | 27,272 (99.6%)                     |                          |
| Urban (20–30 mph)              | 100,242 (78.5%)      | 6,240 (6.2%)              | 94,002 (93.8%)                     |                          |
| <b>Crash time (h), n (%)</b>   |                      |                           |                                    | <0.001                   |
| Midnight (00:00–06:00)         | 4,810 (3.8%)         | 113 (2.4%)                | 4,697 (97.7%)                      |                          |

Formatted: Right: 0.25"

|                                           |                 |              |                 |        |
|-------------------------------------------|-----------------|--------------|-----------------|--------|
| Rush hours (07:00–08:00/17:00–18:00)      | 41,619 (32.6%)  | 2,056 (4.9%) | 39,563 (95.1%)  |        |
| Nonrush hours (09:00–16:00)               | 61,696 (48.3%)  | 3,363 (5.5%) | 58,333 (94.6%)  |        |
| Evening (19:00–23:00)                     | 19,512 (15.3%)  | 831 (4.3%)   | 18,681 (95.7%)  |        |
| <b>Crash day, n (%)</b>                   |                 |              |                 | <0.001 |
| Weekend                                   | 28,730 (22.5%)  | 1,072 (3.7%) | 27,658 (96.3%)  |        |
| Weekday                                   | 98,907 (77.5%)  | 5,291 (5.4%) | 93,616 (94.7%)  |        |
| <b>Cyclist's age (years), n (%)</b>       |                 |              |                 | <0.001 |
| ≤18                                       | 51,193 (40.1%)  | 802 (1.6%)   | 50,391 (98.4%)  |        |
| 19–40                                     | 45,760 (35.9%)  | 3,474 (7.6%) | 42,286 (93.4%)  |        |
| 41–64                                     | 26,052 (20.4%)  | 1,773 (6.8%) | 24,279 (93.2%)  |        |
| ≥65                                       | 4,632 (3.6%)    | 314 (6.8%)   | 4,318 (93.2%)   |        |
| <b>Cyclist's sex, n (%)</b>               |                 |              |                 | <0.001 |
| Male                                      | 103,766 (81.3%) | 4,404 (4.2%) | 99,362 (95.8%)  |        |
| Female                                    | 23,871 (18.7%)  | 1,959 (8.2%) | 21,912 (91.8%)  |        |
| <b>Crash partner, n (%)</b>               |                 |              |                 | <0.001 |
| Taxi/Private hire car                     | 2,588 (2.0%)    | 273 (10.6%)  | 2,315 (89.5%)   |        |
| Car                                       | 106,668 (83.6%) | 5,514 (5.2%) | 101,154 (94.8%) |        |
| Bus/Heavy goods vehicle                   | 18,381 (14.4%)  | 576 (3.1%)   | 17,805 (96.9%)  |        |
| <b>Crash partner's age (years), n (%)</b> |                 |              |                 | <0.001 |
| ≤18                                       | 2,415 (1.9%)    | 1,62 (5.2%)  | 2,253 (93.3%)   |        |
| 19–40                                     | 49,103 (38.5%)  | 2,585 (5.3%) | 46,518 (94.7%)  |        |
| 41–64                                     | 35,598 (27.9%)  | 1,887 (5.3%) | 33,711 (94.7%)  |        |
| ≥65                                       | 40,521 (31.8%)  | 1,729 (4.3%) | 38,792 (95.7%)  |        |
| <b>Crash partner's sex, n (%)</b>         |                 |              |                 | <0.001 |
| Male                                      | 97,447 (76.6%)  | 4,123 (4.2%) | 93,324 (95.8%)  |        |
| Female                                    | 30,190 (23.7%)  | 2,240 (7.4%) | 27,950 (92.6%)  |        |

248

249

### 250 Risk factors for the three crash types

251 Table 4 presents the logistic regression model results. Regarding overtaking crashes, the  
 252 identified risk factors included daylight conditions (adjusted odds ratio [AOR] = 1.233, 95%  
 253 confidence interval [CI] = 1.162–1.309;  $p < 0.001$ ), speed limits of  $\geq 40$  mph (AOR = 2.238, 95% CI  
 254 = 2.159–2.320;  $p < 0.001$ ), nonrush hours (AOR = 1.091, 95% CI 1.031–1.154;  $p = 0.003$ ), cyclists  
 255 aged  $\geq 65$  years (AOR = 1.785, 95% CI = 1.649–1.931;  $p < 0.001$ ), female cyclists (AOR = 1.106, 95%  
 256 CI = 1.062–1.153), HGVs as crash partners (AOR = 2.867, 95% CI = 2.473–3.323;  $p < 0.001$ ), elderly  
 257 crash partners (AOR = 2.013, 95% CI = 1.937–2.092;  $p < 0.001$ ), and male crash partners (AOR =  
 258 1.353, 95% CI = 1.292–1.416;  $p < 0.001$ ).

259 For rear-end crashes, noteworthy risk factors included unlit darkness (AOR = 1.486, 95% CI

Formatted: Font color: Text 1

Formatted: Right: 0.25"

260 = 1.404–1.573;  $p < 0.001$ ), speed limits of  $\geq 40$  mph (AOR = 1.315, 95% CI = 1.277–1.354;  $p < 0.001$ ),  
 261 weekdays (AOR = 1.090, 95% CI = 1.059–1.122;  $p < 0.001$ ), midnight hours (AOR = 1.269, 95% CI =  
 262 1.190–1.354;  $p < 0.001$ ), and taxis as crash partners (AOR = 1.286, 95% CI = 1.186–1.394;  $p < 0.001$ ).

Formatted: Font color: Text 1

263 Regarding door crashes, significant risk factors included lit darkness (AOR = 1.373, 95% CI =  
 264 1.141–1.651;  $p < 0.001$ ), speed limits of 20–30 mph (AOR = 16.185, 95% CI = 13.514–19.382;  
 265  $p < 0.001$ ), weekdays (AOR = 1.246, 95% CI = 1.162–1.336;  $p < 0.001$ ), and nonrush hours (AOR =  
 266 2.912, 95% CI = 2.384–3.556;  $p < 0.001$ ). Additionally, female cyclists (AOR = 1.675, 95% CI = 1.582–  
 267 1.774;  $p < 0.001$ ), taxis or private hire cars as crash partners (AOR = 2.695, 95% CI = 2.310–3.145;  
 268  $p < 0.001$ ), male crash partners (AOR = 1.373, 95% CI = 1.296–1.455;  $p < 0.001$ ), and crash partners  
 269 aged 41–64 years (AOR = 1.855, 95% CI = 1.625–2.117;  $p < 0.001$ ) were associated with door  
 270 crashes.

Formatted: Justified

278 **Table 4.** Multivariate logistic regression results

| Variable               | Overtaking crashes   |                | Rear-end crashes     |                | Door crashes            |                |
|------------------------|----------------------|----------------|----------------------|----------------|-------------------------|----------------|
|                        | AOR (95% CI)         | <i>p</i> value | AOR (95% CI)         | <i>p</i> value | AOR (95% CI)            | <i>p</i> value |
| <b>Light condition</b> |                      |                |                      |                |                         |                |
| Daylight               | 1.233 (1.162, 1.309) | <0.001         | Ref                  |                | 1.146 (0.958, 1.370)    | 0.137          |
| Darkness-lit           | Ref                  |                | 1.042 (1.002, 1.085) | 0.041          | 1.373 (1.141, 1.651)    | 0.001          |
| Darkness-unlit         | 1.152 (1.059, 1.253) | 0.001          | 1.486 (1.404, 1.573) | <0.001         | Ref                     |                |
| <b>Speed limit</b>     |                      |                |                      |                |                         |                |
| Rural ( $\geq 40$ mph) | 2.238 (2.159, 2.320) | <0.001         | 1.315 (1.277, 1.354) | <0.001         | Ref                     |                |
| Urban (20–30 mph)      | Ref                  |                | Ref                  |                | 16.185 (13.514, 19.382) | <0.001         |
| <b>Crash time</b>      |                      |                |                      |                |                         |                |
| Midnight               | 1.073 (0.982, 1.173) | 0.119          | 1.269 (1.190, 1.354) | <0.001         | Ref                     |                |
| Rush hours             | 1.059 (1.002, 1.120) | 0.043          | 1.108 (1.078, 1.139) | <0.001         | 2.502 (2.051, 3.052)    | <0.001         |
| Nonrush hours          | 1.091 (1.031, 1.154) | 0.003          | Ref                  |                | 2.912 (2.384, 3.556)    | <0.001         |
| Evening                | Ref                  |                | 0.992 (0.953, 1.032) | 0.686          | 2.014 (1.646, 2.465)    | <0.001         |

Formatted: Right: 0.25"

**Table 4.** Multivariate logistic regression results (*continued*)

| Variable                           | Overtaking crashes   |         | Rear-end crashes     |         | Door crashes         |         |
|------------------------------------|----------------------|---------|----------------------|---------|----------------------|---------|
|                                    | AOR (95% CI)         | p value | AOR (95% CI)         | p value | AOR (95% CI)         | p value |
| <b>Crash day</b>                   |                      |         |                      |         |                      |         |
| Weekend                            | 1.031 (0.991, 1.072) | 0.132   | Ref                  |         | Ref                  |         |
| Weekday                            | Ref                  |         | 1.090 (1.059, 1.122) | <0.001  | 1.246 (1.162, 1.336) | <0.001  |
| <b>Cyclist's age (years)</b>       |                      |         |                      |         |                      |         |
| ≤18                                | Ref                  |         | Ref                  |         | Ref                  |         |
| 19–40                              | 1.292 (1.242, 1.345) | <0.001  | 1.839 (1.788, 1.891) | <0.001  | 5.943 (5.489, 6.435) | <0.001  |
| 41–64                              | 1.509 (1.444, 1.578) | <0.001  | 1.731 (1.676, 1.789) | <0.001  | 6.129 (5.621, 6.684) | <0.001  |
| ≥65                                | 1.785 (1.649, 1.931) | <0.001  | 1.671 (1.568, 1.780) | <0.001  | 5.988 (5.217, 6.874) | <0.001  |
| <b>Cyclist's sex</b>               |                      |         |                      |         |                      |         |
| Male                               | Ref                  |         | 1.172 (1.137, 1.208) | <0.001  | Ref                  |         |
| Female                             | 1.106 (1.062, 1.153) | <0.001  | Ref                  |         | 1.675 (1.582, 1.774) | <0.001  |
| <b>Crash partner</b>               |                      |         |                      |         |                      |         |
| Taxi/Private hire car              | Ref                  |         | 1.286 (1.186, 1.394) | <0.001  | 2.695 (2.310, 3.145) | <0.001  |
| Car                                | 1.571 (1.359, 1.816) | <0.001  | Ref                  |         | 2.089 (1.908, 2.286) | <0.001  |
| Bus/Heavy goods vehicle            | 2.867 (2.473, 3.323) | <0.001  | 1.099 (1.061, 1.139) | <0.001  | Ref                  |         |
| <b>Crash partner's age (years)</b> |                      |         |                      |         |                      |         |
| ≤18                                | 1.097 (0.963, 1.249) | 0.162   | 1.225 (1.188, 1.263) | <0.001  | 1.507 (1.313, 1.731) | <0.001  |
| 19–40                              | Ref                  |         | 1.038 (1.008, 1.069) | 0.013   | 1.855 (1.625, 2.117) | <0.001  |
| 41–64                              | 0.950 (0.909, 0.994) | 0.025   | Ref                  |         | 1.801 (1.574, 2.060) | <0.001  |
| ≥65                                | 2.013 (1.937, 2.092) | <0.001  | 1.241 (1.137, 1.355) | <0.001  | Ref                  |         |
| <b>Crash partner's sex</b>         |                      |         |                      |         |                      |         |
| Male                               | 1.353 (1.292, 1.416) | <0.001  | 1.150 (1.117, 1.185) | <0.001  | 1.373 (1.296, 1.455) | <0.001  |
| Female                             | Ref                  |         | Ref                  |         | Ref                  |         |

279  
 280 Figure 2 presents a forest plot demonstrating the joint effects of several variables on the  
 281 three crash types when other variables were controlled for. The results identified several key risk

282 factors for both overtaking and rear-end crashes. The risk of overtaking crashes showed a  
 283 significant increase of 193% in rural areas when elderly drivers were involved (AOR = 2.93, 95%  
 284 CI = 2.79–3.08), and similarly when heavy goods vehicles (HGVs) were the crash partner (AOR =  
 285 2.62, 95% CI = 2.46–2.78). Elderly cyclists also faced a higher risk of overtaking crashes on  
 286 weekends (AOR = 1.56, 95% CI = 1.34–1.81).

287 Regarding rear-end crashes, the risk increased notably with unlit darkness during  
 288 midnight (AOR = 1.68, 95% CI = 1.48–1.90) and was significantly higher in rural areas (AOR = 2.15,

Formatted: Font color: Text 1

Formatted: Right: 0.25"

289 95% CI = 2.01–2.31). Furthermore, bicycling at midnight in rural areas was associated with an  
 290 increased risk of rear-end crashes (AOR = 1.68; 95% CI = 1.51–1.86). In urban settings, the risk of  
 291 door crashes was higher for female cyclists (AOR = 2.29; 95% CI = 2.17–2.43) and for elderly  
 292 cyclists (AOR = 2.06; 95% CI = 1.82–2.34). Finally, female cyclists exhibited a 112% higher  
 293 likelihood of door crashes when the crash partner was a taxi (AOR = 2.12; 95% CI = 1.68–2.69).

294

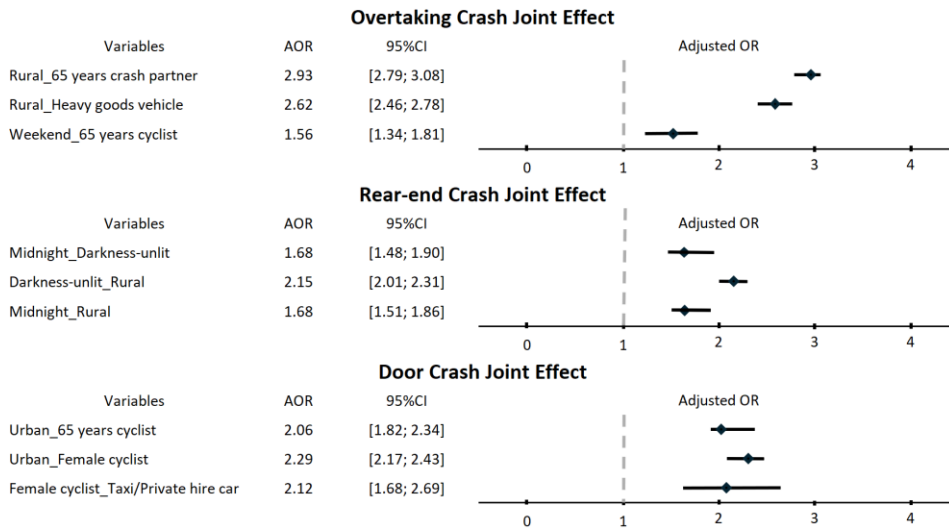

Figure 3. Joint effects of several variables on the three crash types.

295  
 296  
 297  
 298  
 299  
 300

### 301 Discussion

302 This study explored the relationships among individual and environmental factors in relation to  
 303 three common bicycle crash types (overtaking, rear-end, and door crashes) on roads in the United  
 304 Kingdom from 1991 to 2020. The findings revealed several significant factors. First, for overtaking  
 305 crashes, HGVs as crash partners, rural areas, and the involvement of elderly crash partners

Formatted: Right: 0.25"

306 emerged as key contributing factors. Second, unlit darkness, midnight hours, and rural areas  
307 were the factors most closely associated with rear-end crashes. Third, urban areas and taxis as  
308 crash partners significantly increased the likelihood of door crashes. Moreover, male crash  
309 partners were found to be a consistent risk factor across all three crash types.

310 Our research findings identified specific risk factors for overtaking crashes, namely rural  
311 areas, HGVs as crash partners, and elderly crash partners. These findings align with previous  
312 research that identified elderly drivers [24], speeds exceeding 10 mph, and the presence of pick-  
313 up trucks as factors contributing to increased risk for overtaking crash. Specifically, HGVs possess  
314 several characteristics that amplify this danger. Their large blind spots make it difficult for drivers  
315 to see cyclists, increasing the likelihood of crashes during overtaking. Additionally, HGVs are less  
316 maneuverable compared to passenger cars, which reduces their ability to avoid  
317 crashes if cyclists suddenly enter their path. The speed and distance perception issues between  
318 HGVs and cyclists further complicate the judgment of safe overtaking gaps. Furthermore, HGVs  
319 require longer stopping distances due to their size and weight, which can lead to severe  
320 consequences if a sudden need to brake arises. A behavioural study suggested that compared  
321 with cars, HGVs tended to maintain a narrower clearance zone when overtaking bicycles [25].

322 Regarding the association with buses or HGVs, Pai et al. [18], ~~suggests~~ suggested that time  
323 pressures on HGV drivers for timely loading and unloading might lead to more reckless driving.  
324 Specifically, our results align with the observations made by Pai et al., who also mentioned higher  
325 crash rates involving buses or HGVs, supporting the idea that these time pressures contribute to  
326 increased crash risks. Our findings underscore the necessity of implementing measures such as  
327 'Share the Road' warning signs [26], particularly in rural settings, where HGVs are likely to execute

Formatted: Font color: Text 1

Formatted: Right: 0.25"



328 overtaking manoeuvres at high speed. Such measures could prompt motor vehicles to maintain  
329 safer distances from the edges of travel lanes, especially in areas with a notable presence of both  
330 HGVs and bicycles.

331 We also identified elderly drivers as a factor contributing to overtaking crashes—a finding  
332 consistent with relevant research [24]. We found that as individuals age, their risk of being  
333 involved in road accidents increases, primarily due to declines in cognitive capabilities. Our study  
334 corroborates these findings by showing that older cyclists are more susceptible to accidents  
335 during overtaking ~~maneuvers~~manoeuvres, which can be attributed to diminished reaction times  
336 and impaired decision-making abilities [27], their health [28], and their driving performance [29].

337 Notably, crashes involving elderly individuals often occur in scenarios with challenging conditions,  
338 including at intersections without traffic control measures, on high-speed roads, during adverse  
339 weather conditions, in poorly lit areas, and in head-on accidents [30-32]. The heightened level of  
340 risk under such conditions may be attributed to cognitive and perceptual decline in older drivers,  
341 which could affect their capacity to execute actions such as overtaking manoeuvres safely.  
342 Accordingly, developing specialised cognitive training programmes as interventions to enhance

343 road safety for elderly drivers is evidently necessary [33]. Based on our study's findings, we  
344 recommend the development of ~~specialized~~specialised interventions to improve road safety for  
345 elderly cyclists. Our analysis reveals that older cyclists are at a higher risk of being involved in  
346 overtaking crashes, with this increased risk being strongly linked to declines in cognitive  
347 capabilities associated with aging. To address this issue, we advocate for the implementation of  
348 targeted cognitive training programs specifically designed for elderly cyclists. These programs  
349 should focus on enhancing critical skills such as reaction time, situational awareness, and

Formatted: Font color: Text 1

Formatted: Right: 0.25"

350 decision-making abilities, which are crucial for reducing crash risk and improving overall road  
351 safety.

352 In the present study, several factors were found to increase the risk of rear-end crashes on  
353 road segments, including darkness with unlit surroundings, midnight hours, and rural settings  
354 (speed limit > 40 mph). Although few studies have specifically addressed rear-end crashes  
355 involving bicycles on road segments, available data suggest that the low conspicuity of bicycles,  
356 especially at night, is a recurrent factor in rear-end crashes [18, 34]. Moreover, a lack of adequate  
357 street lighting, which is common in rural settings, predisposes cyclists to rear-end crashes [18].  
358 Our joint-effects analysis further indicated that the detrimental effect of unlit darkness is more  
359 pronounced in rural areas and during midnight hours. Potential intervention strategies to  
360 mitigate rear-end crashes include enhancing illumination and executing speed control  
361 management on rural road segments with heavy bicycle traffic.

362 Next, our analysis successfully identified associations of urban areas and taxis and private  
363 hire cars as crash partners with door crashes on road segments. Although research specifically  
364 focusing on door crashes on road segments is limited, similar findings were documented by Pai,  
365 indicating that urban roadways and taxis contributed to door crashes [18]. However, determining  
366 the factors influencing this trend poses a challenge. One possible explanation could be the  
367 increased presence of taxis or private hire cars in such areas, where passengers often disembark.  
368 Additionally, our analysis further revealed an elevated risk of door crashes involving crashes with  
369 taxis in urban areas. To reduce door crashes on road segments, educating taxi drivers, as well as  
370 passengers, about the importance of vigilance when opening doors near traffic is essential [18].  
371 In addition, cyclists should be advised to maintain at least a door's width distance from all parked

372 cars to improve the sight triangles of drivers and increase the visibility of cyclists [35].  
373 Implementing a two-stage door opening mechanism for vehicles, which would enable drivers to  
374 verify the presence of bicycles to the rear, could also be beneficial [36].

375 The strengths of this study include the use of STATS19 datasets spanning from 1991 to 2020,  
376 which provides a robust statistical foundation and a broad perspective on trends in bicycle  
377 crashes. By focusing specifically on three crash types on road segments—overtaking, rear-end,  
378 and door crashes—the study provides a comprehensive and focused analysis, which can yield  
379 more actionable insights and more effective recommendations. The UK-based dataset ensures  
380 that the findings are particularly relevant for local policy and safety interventions. Additionally,  
381 the application of statistical techniques and the consideration of various factors, such as crash  
382 partner and time of day, enhance the validity and depth of the analysis.

383 This study had several limitations that warrant acknowledgement. First, the substantial  
384 underreporting of nonfatal casualties to the police, particularly casualties involving cyclists not  
385 obligated to report accidents, is a critical factor to consider. Such underreporting, as highlighted  
386 by the U.K. Government’s Department for Transport [11], likely results in the incomplete  
387 representation of nonfatal and ‘slight’ casualties in road casualty data. Second, the STATS19 data  
388 utilised in this study lack critical variables, including precrash speeds, specific geometric  
389 characteristics of roadways, data regarding alcohol and illicit substance use, and cyclist speed at  
390 the time of an accident. Moreover, critical exposure data—such as those related to traffic flow,  
391 rider or driver experience, and other elements of risk exposure—are absent, and the absence of  
392 such details limits our ability to fully account for potential variations resulting from unobserved  
393 factors in the analyses. Finally, this study did not explore annual trends in each type of bicycle

Formatted: Font color: Text 1

Formatted: Right: 0.25"

394 crash over the 30-year study period; investigating such trends could provide insights regarding  
395 changing behaviours among cyclists and motor vehicle drivers as well as the effects of legislative  
396 changes for road speed limits.

397 One inherent problem with police-reported crash data is the variables not readily available,  
398 hereby causing unobserved heterogeneity across the observations. To overcome such a  
399 limitation, we estimated separate regression models, as suggested by Kim et al. [37], for the three  
400 crash types; such an approach provides greater explanatory power compared to single overall  
401 models. Further, we conducted joint-effect analyses of several variables of interest that capture  
402 heterogeneity. In our previous studies, we adopted the above-mentioned approaches to  
403 overcome the inherent problem with a success [38, 39].

404 Future research directions could involve integrating GPS (Global Positioning System) data  
405 and weather conditions to analyse both ~~the~~ injury frequency and fatalities of bicycle crashes on  
406 road segments. Additionally, exploring the potential of autonomous vehicles for detecting  
407 approaching bicycles for door-crashes and implementing AI-controlled lighting systems in rural  
408 areas for cyclist detection could be promising areas for further study.

## 410 **Recommendations**

411 For overtaking crashes, we recommend implementing 'Share the Road' warning signs,  
412 especially in rural areas, and developing specialized cognitive training programs for elderly  
413 drivers. Regarding rear-end crashes, our suggestions include improving illumination during night  
414 time and implementing speed control measures on rural road segments. For door crashes  
415 involving parked cars, we propose enhancing driver sight triangles and increasing cyclist visibility.

Formatted: Font color: Text 1

Formatted: Right: 0.25"

416 Moreover, implementing a two-stage door opening mechanism and an automatic detection  
417 device in vehicles to alert drivers of bicycles approaching from behind could potentially be  
418 beneficial.

419

## 420 **Conclusions**

421 This study identified several significant risk factors for the three predominate types of crashes  
422 involving cyclists on road segments: HGVs as crash partners, elderly crash partners, and rural  
423 areas for overtaking crashes; unlit darkness, midnight hours, and rural areas for rear-end crashes;  
424 and urban areas and taxis as crash partners for door crashes. These risk factors remained  
425 unchanged since our previous study conducted in 2011 [15]. The present research enhances the  
426 field of bicycle safety research by concluding that the detrimental effects of certain variables  
427 become more pronounced under certain conditions. For example, first, cyclists in rural settings  
428 exhibited an elevated risk of overtaking crashes involving HGVs. Second, the rear-end crash risk  
429 increases in the combined presence of unlit darkness, midnight hours, and rural areas. Finally, in  
430 urban settings, the likelihood of door crashes increases when a taxi is the crash partner.

431

## 432 **Abbreviations**

433 WHO: World Health Organization; HGVs: heavy goods vehicles; AOR: adjusted odds ratio; CI:  
434 confidence interval.

435

## 436 **Acknowledgments**

437 This manuscript was edited by Wallace Academic Editing.

Formatted: Right: 0.25"

438

439 **Author contributions**

440 **Literature review:** Chun-Chieh Chao.

441 **Methodology:** Chun-Chieh Chao, Chih-Wei Pai.

442 **Data merging and analysis:** Akhmad Fajri Widodo-, Wafaa Saleh, Bayu Satria Wiratama.

443 **Writing - original draft:** Chun-Chieh Chao.

444 **Writing – review and editing:** Hui-An Lin, Chenyi Chen, Hon-Ping Ma, Akhmad Fajri Widodo.

445 **Validation:** Chun-Chieh Chao, Hui-An Lin, Chenyi Chen, Hon-Ping Ma, Shih Yu Ko.

446 **Supervision:** Li Wei, Yen-Nung Lin, Shou-Chien Hsu, Chih-Wei Pai.

447 **Funding:** Cheng-Wei Chan, Chih-Wei Pai.

448

449 **Funding**

450 This study received financial support from the Ministry of Science and Technology, Taiwan (MOST  
451 110–2410-H-038-016-MY2 and MOST 109–2314-B-038-066-); New Taipei City Hospital  
452 (NTPC113–002); and the National Science and Technology Council, Taiwan (NSTC 112-2410-H-  
453 038-016-MY2). The funders played no role in the design of the study, data collection and analysis,  
454 interpretation of data, or preparation of the manuscript.

455

456 **Availability of data and materials**

457 This study utilised the British STATS19 database, which contains data on all road traffic accidents  
458 in the United Kingdom. The data that support the findings of this study are openly available at

459 <https://figshare.com/ndownloader/files/48173452https://www.data.gov.uk/dataset/cb7ae6f0-4bc6-4935-9277-47c5ce24a11f/road-safety-data>.

461

## 462 **Declarations**

### 463 **Ethical approval and consent to participate**

464 This study was conducted in accordance with the Declaration of Helsinki and approved by the  
465 Joint Institutional Review Board of Taipei Medical University (N202011030).

466

### 467 **Consent for publication**

468 This study was approved by the Joint Institutional Review Board of Taipei Medical  
469 University (N202011030). The Joint Institutional Review Board of Taipei Medical University has  
470 waived the requirement of informed consent. All methods were performed in accordance with  
471 the relevant guidelines and regulations of the Declaration of Helsinki.

472

### 473 **Competing interests**

474 The authors declare that they have no competing interests in relation to this work.

475

### 476 **Author information**

477 <sup>1</sup>Graduate Institute of Injury Prevention and Control, College of Public Health, Taipei Medical  
478 University, Taipei City, Taiwan. <sup>2</sup>Department of Emergency Medicine, Taipei Medical University  
479 Hospital, Taipei City, Taiwan. <sup>3</sup>Department of Emergency Medicine, School of Medicine, College  
480 of Medicine, Taipei Medical University, Taipei City, Taiwan. <sup>4</sup>Department of Emergency Medicine,

Formatted: Right: 0.25"

481 New Taipei City Hospital, New Taipei City, Taiwan. <sup>5</sup>College of Medicine, Chang Gung University,  
482 Taoyuan City, Taiwan. <sup>6</sup>Department of Emergency Medicine, Chang Gung Memorial Hospital,  
483 Linkou branch, Taoyuan, Taiwan. <sup>7</sup> Department of Emergency Medicine, Taipei Medical  
484 University-Shuang Ho Hospital, New Taipei City, Taiwan. <sup>8</sup>Taipei Neuroscience Institute, Taipei  
485 Medical University, Taipei City, Taiwan. <sup>9</sup>Division of Neurosurgery, Department of Surgery, Wan  
486 Fang Hospital, Taipei Medical University, Taipei City, Taiwan. <sup>10</sup>Department of Physical Medicine  
487 and Rehabilitation, Wan Fang Hospital, Taipei Medical University, Taipei City, Taiwan. <sup>11</sup>Transport  
488 Research Institute, Edinburgh Napier University, Edinburgh, Scotland. <sup>12</sup>Department of  
489 Epidemiology, Biostatistics, and Population Health, Faculty of Medicine, Public Health and  
490 Nursing, Universitas Gadjah Mada, Yogyakarta City, Indonesia, <sup>13</sup>Department of Occupational  
491 Medicine, Chang Gung Memorial Hospital, Linkou branch, Taoyuan, Taiwan.



492 **References:**

- 493 1. Kjeldgard L, Ohlin M, Elrud R, Stigson H, Alexanderson K, Friberg E. Bicycle crashes and  
494 sickness absence - a population-based Swedish register study of all individuals of working ages.  
495 BMC Public Health. 2019;19(1):943.
- 496 2. World Health Organization. Regional Office for E. Walking and cycling: latest evidence to  
497 support policy-making and practice. Copenhagen: World Health Organization. Regional Office for  
498 Europe; 2022.
- 499 3. Venkatraman V, Richard CM, Magee K, Johnson K. Countermeasures that work: A highway  
500 safety countermeasure guide for state highway safety offices, 10th Edition, 2020. (DOT HS 813  
501 097).
- 502 4. Allen-Munley C, Daniel J, Dhar S. Logistic model for rating urban bicycle route safety.  
503 Transportation Research Record. 2004;1878(1):107-15.
- 504 5. Kaplan JA. Characteristics of the Regular Adult Bicycle User. Final Report 1975.
- 505 6. Rivara FP, Thompson DC, Thompson RS. Epidemiology of bicycle injuries and risk factors  
506 for serious injury. Inj Prev. 1997;3(2):110-4.
- 507 7. Wanvik PO. Effects of road lighting: an analysis based on Dutch accident statistics 1987-  
508 2006. Accid Anal Prev. 2009;41(1):123-8.
- 509 8. Elvik R, Sundfør HB. How can cyclist injuries be included in health impact economic  
510 assessments? Journal of Transport & Health. 2017;6:29-39.
- 511 9. Aertsens J, de Geus B, Vandenbulcke G, Degraeuwe B, Broekx S, De Nocker L, et al.  
512 Commuting by bike in Belgium, the costs of minor accidents. Accident Analysis & Prevention.  
513 2010;42(6):2149-57.
- 514 10. Scholten AC, Polinder S, Panneman MJ, Van Beeck EF, Haagsma JA. Incidence and costs of  
515 bicycle-related traumatic brain injuries in the Netherlands. Accident Analysis & Prevention.  
516 2015;81:51-60.
- 517 11. Traffic Safety Facts - Bicyclists and Other Cyclists.  
518 <https://crashstats.nhtsa.dot.gov/Api/Public/ViewPublication/813322>: National Highway Traffic  
519 Safety Administration; 2020.
- 520 12. Bil M, Bilova M, Muller I. Critical factors in fatal collisions of adult cyclists with automobiles.  
521 Accid Anal Prev. 2010;42(6):1632-6.
- 522 13. Moore DN, Schneider WHt, Savolainen PT, Farzaneh M. Mixed logit analysis of bicyclist  
523 injury severity resulting from motor vehicle crashes at intersection and non-intersection locations.  
524 Accid Anal Prev. 2011;43(3):621-30.
- 525 14. Wachtel A, Lewiston D. Risk factors for bicycle-motor vehicle collisions at intersections.  
526 ITE journal. 1994;64(9):30-5.
- 527 15. Ugan J, Abdel-Aty M, Cai Q, Mahmoud N, Al-Omari Me. Effect of various speed  
528 management strategies on bicycle crashes for urban roads in Central Florida. Transportation  
529 Research Record: Journal of the Transportation Research Board. 2021;2676:036119812110366.
- 530 16. Meuleners LB, Fraser M, Johnson M, Stevenson M, Rose G, Oxley J. Characteristics of the  
531 road infrastructure and injurious cyclist crashes resulting in a hospitalisation. Accident Analysis &  
532 Prevention. 2020;136:105407.
- 533 17. Robartes E, Chen T-D. The effect of crash characteristics on cyclist injuries: An analysis of  
534 Virginia automobile-bicycle crash data. Accid Anal Prev. 2017;104:165-73.

Formatted: Right: 0.25"

- 535 18. Pai C-W. Overtaking, rear-end, and door crashes involving bicycles: an empirical  
536 investigation. *Accid Anal Prev.* 2011;43(3):1228-35.
- 537 19. Debnath AK, Haworth N, Schramm A, Heesch KC, Somoray K. Factors influencing  
538 noncompliance with bicycle passing distance laws. *Accid Anal Prev.* 2018;115:137-42.
- 539 20. Vandenbrouckel JP, von Elm E, Altman DG, Gotzsche PC, Mulrow CD, Pocock SJ, et al.  
540 Strengthening the Reporting of Observational Studies in Epidemiology (STROBE): explanation and  
541 elaboration. *PLoS Medicine.* 2007;4(10):1628-55.
- 542 21. Watson A, Watson B, Vallmuur K. Estimating under-reporting of road crash injuries to  
543 police using multiple linked data collections. *Accident Analysis & Prevention.* 2015;83:18-25.
- 544 22. Maldonado G, Greenland S. Simulation study of confounder-selection strategies.  
545 *American Journal of epidemiology* ~~Journal of epidemiology~~ *Epidemiology.* 1993;138(11):923-36.
- 546 23. Chen P-L, Pai C-W. Evaluation of injuries sustained by motorcyclists in approach-turn  
547 crashes in Taiwan. *Accident Analysis & Prevention.* 2019;124:33-9.
- 548 24. Liu J, Jones S, Adanu EK, Li X. Behavioral pathways in bicycle-motor vehicle crashes: From  
549 contributing factors, pre-crash actions, to injury severities. *J Safety Res.* 2021;77:229-40.
- 550 25. Walker I. Signals are informative but slow down responses when drivers meet bicyclists  
551 at road junctions. *Accid Anal Prev.* 2005;37(6):1074-85.
- 552 26. Kay JJ, Savolainen PT, Gates TJ, Datta TK. Driver behavior during bicycle passing  
553 maneuvers in response to a Share the Road sign treatment. *Accid Anal Prev.* 2014;70:92-9.
- 554 27. Anstey KJ, Horswill MS, Wood JM, Hatherly C. The role of cognitive and visual abilities as  
555 predictors in the Multifactorial Model of Driving Safety. *Accid Anal Prev.* 2012;45:766-74.
- 556 28. Kandasamy D, Betz ME, DiGuseppi C, Mielenz TJ, Eby DW, Molnar LJ, et al. Self-reported  
557 health conditions and related driving reduction in older drivers. *Occup Ther Health Care.*  
558 2018;32(4):363-79.
- 559 29. Laosee O, Rattanapan C, Somrongthong R. Physical and cognitive functions affecting road  
560 traffic injuries among senior drivers. *Arch Gerontol Geriatr.* 2018;78:160-4.
- 561 30. Cicchino JB, Wells JK, McCartt AT. Survey about pedestrian safety and attitudes toward  
562 automated traffic enforcement in Washington, D.C. *Traffic Inj Prev.* 2014;15(4):414-23.
- 563 31. Kostyniuk LP, Molnar LJ. Self-regulatory driving practices among older adults: health, age  
564 and sex effects. *Accid Anal Prev.* 2008;40(4):1576-80.
- 565 32. Zhang J, Lindsay J, Clarke K, Robbins G, Mao Y. Factors affecting the severity of motor  
566 vehicle traffic crashes involving elderly drivers in Ontario. *Accid Anal Prev.* 2000;32(1):117-25.
- 567 33. Edwards JD, Ross LA, Wadley VG, Clay OJ, Crowe M, Roenker DL, et al. The useful field of  
568 view test: normative data for older adults. *Arch Clin Neuropsychol.* 2006;21(4):275-86.
- 569 34. Wood JM, Lacherez PF, Marszalek RP, King MJ. Drivers' and cyclists' experiences of sharing  
570 the road: incidents, attitudes and perceptions of visibility. *Accid Anal Prev.* 2009;41(4):772-6.
- 571 35. Hunter W, Stewart JR. An evaluation of bike lanes adjacent to motor vehicle parking. 1999.
- 572 36. Huang C-Y. Observations of drivers' behavior when opening car doors. *Procedia*  
573 *Manufacturing.* 2015;3:2753-60.
- 574 37. Kim D-G, Washington S, Oh J. Modeling crash types: New insights into the effects of  
575 covariates on crashes at rural intersections. *Journal of Transportation Engineering.*  
576 2006;132(4):282-92.
- 577 38. Pai C-W, Saleh W. Modelling motorcyclist injury severity by various crash types at T-  
578 junctions in the UK. *Safety Science.* 2008; 13:89-98.

Formatted: Right: 0.25"

579 39. Pai C-W, Jou R-C. Cyclists' red-light running behaviours: An examination of risk-taking,  
580 opportunistic, and law-obeying behaviours. *Accident Analysis & Prevention*. 2014;62:191-8.  
581

1 **Risk Factors for Overtaking, Rear-End, and Door Crashes Involving Bicycles in the United**  
2 **Kingdom: Revisited and Reanalysed**  
3

4 **Chun-Chieh Chao<sup>1,2,3†</sup>, Hon-Ping Ma<sup>1,3,7</sup>, Li Wei<sup>1,8,9</sup>, Yen-Nung Lin<sup>1,10</sup>, Chenyi Chen<sup>1</sup>, Wafaa Saleh<sup>11</sup>, Bayu Satria**  
5 **Wiratama<sup>12</sup>, Akhmad Fajri Widodo<sup>1</sup>, Shou-Chien Hsu<sup>6,13</sup>, Shih Yu Ko<sup>7</sup>, Hui-An Lin<sup>1,2,3†</sup>, Cheng-Wei Chan<sup>1,4,5,6†</sup>, Chih-**  
6 **Wei Pai<sup>1\*</sup>**

7 <sup>1</sup>Graduate Institute of Injury Prevention and Control, College of Public Health, Taipei Medical University, Taipei  
8 City, Taiwan, <sup>2</sup> Department of Emergency Medicine, Taipei Medical University Hospital, Taipei City, Taiwan, <sup>3</sup>  
9 Department of Emergency Medicine, School of Medicine, College of Medicine, Taipei Medical University, Taipei,  
10 Taiwan, <sup>4</sup> Department of Emergency Medicine, New Taipei City Hospital, New Taipei City, Taiwan, <sup>5</sup> College of  
11 Medicine, Chang Gung University, Taoyuan City, Taiwan, <sup>6</sup> Department of Emergency Medicine, Chang Gung  
12 Memorial Hospital, Linkou branch, Taoyuan, Taiwan, <sup>7</sup> Department of Emergency Medicine, Taipei Medical  
13 University-Shuang Ho Hospital, New Taipei City, Taiwan, <sup>8</sup> Taipei Neuroscience Institute, Taipei Medical University,  
14 Taipei, Taiwan, <sup>9</sup> Division of Neurosurgery, Department of Surgery, Wan Fang Hospital, Taipei Medical University,  
15 Taipei, Taiwan, <sup>10</sup> Department of Physical Medicine and Rehabilitation, Wan Fang Hospital, Taipei Medical  
16 University, Taipei, Taiwan, <sup>11</sup> Transport Research Institute, Edinburgh Napier University, Edinburgh, Scotland, <sup>12</sup>  
17 Department of Epidemiology, Biostatistics, and Population Health, Faculty of Medicine, Public Health and Nursing,  
18 Universitas Gadjah Mada, Yogyakarta City, Indonesia, <sup>13</sup> Department of Occupational Medicine, Chang Gung  
19 Memorial Hospital, Linkou branch, Taoyuan, Taiwan.

20 \* Correspondence: cpai@tmu.edu.tw

21 † Contributed equally to this work

22 **Abstract**

23 **Background and** ~~Relevant research has provided valuable insights into risk factors for bicycle~~  
24 ~~crashes at intersections. However, few studies have focused explicitly on three common types of~~  
25 ~~bicycle crashes on road segments: overtaking, rear-end, and door crashes.~~

26 **Objective:** ~~Relevant research has provided valuable insights into risk factors for bicycle crashes~~  
27 ~~at intersections. However, few studies have focused explicitly on three common types of bicycle~~  
28 ~~crashes on road segments: overtaking, rear-end, and door crashes. This study aims to identify~~  
29 ~~risk factors for overtaking, rear-end, and door crashes that occur on road segment. Relevant~~  
30 ~~research has provided valuable insights into risk factors for bicycle crashes at intersections.~~  
31 ~~However, few studies have focused explicitly on three common types of bicycle crashes on road~~  
32 ~~segments: overtaking, rear-end, and door crashes. This study aims to identify risk factors for~~  
33 ~~overtaking, rear-end, and door crashes that occur on road segments.~~

34 **Material and methods**

35 We analysed British STATS19 accident records from 1991 to 2020. Using multivariate logistic  
36 regression models, we estimated adjusted odds ratios (AORs) with 95% confidence intervals (CIs)  
37 for multiple risk factors. The analysis included 127,637 bicycle crashes, categorised into 18,350  
38 overtaking, 44,962 rear-end, 6,363 door, and 57,962 other crashes.

39 **Results**

40 Significant risk factors for overtaking crashes included ~~speed limits of  $\geq 40$  miles per hour (mph)~~  
41 ~~(AOR = 2.2438, 95% CI = 2.1596–2.320)~~, heavy goods vehicles (HGVs) as crash partners (AOR =  
42 ~~1.302–867~~, 95% CI ~~2.41.273–3.321.333~~), and elderly crash partners (AOR = ~~2.012–013~~, 95% CI =  
43 ~~1.94–2.091–9374–2.092~~), and decreased risk in rural area with speed limits of 20-30 miles per

44 [hour](#) (AOR = 0.45, 95% CI =0.43-0.47). For rear-end crashes, noteworthy risk factors included  
45 unlit darkness (AOR = 1.4869, 95% CI = 1.404–1.573) and midnight hours (AOR = 1.26978, 95% CI  
46 = 1.19210–1.40354). Factors associated with door crashes included [urban areas speed limits of](#)  
47 [20–30 mph](#) (AOR = 16.21859, 95% CI = 13.514–19.4382) and taxi ~~or~~ private hire cars (AOR =  
48 ~~2.6957~~[01.61](#), 95% CI =~~1.57–2.310–3.14~~[51.69](#)). Our joint-effect analysis revealed additional  
49 interesting results; for example, there were elevated risks for overtaking crashes in rural areas  
50 with elderly drivers as crash partners (AOR = 2.93, 95% CI = 2.79–3.08) and with HGVs as crash  
51 partners (AOR = 2.62, 95% CI = 2.46–2.78).

52

### 53 **Conclusions**

54 The aforementioned risk factors remained largely unchanged since 2011, when we conducted  
55 our previous study. However, the present study concluded that the detrimental effects of certain  
56 variables became more pronounced in certain situations. For example, cyclists in rural settings  
57 exhibited an elevated risk of overtaking crashes involving HGVs as crash partners.

58

59 **Keywords:** Bicycle crash; Road segment; Overtaking crash; Rear-end crash; Door crash

60

61

62

### 63 **Introduction**

64 In recent years, urban bicycling has become increasingly popular in many countries, offering  
65 benefits such as reduced traffic congestion, diminished parking pressure, and a reduction in

Formatted: Indent: First line: 2 ch

66 greenhouse gas emissions (1, 2). The World Health Organization has highlighted numerous health  
67 advantages of moderate-intensity physical activities such as bicycling, including improvements in  
68 life expectancy, quality of life, cognitive function, mental health, sleep quality, muscular and  
69 cardiorespiratory fitness, and bone and functional health (1).

70 However, despite such health benefits, the risk of injury remains a considerable safety  
71 concern for cyclists, who are regarded as vulnerable road users (1, 3). Traffic crash data indicate  
72 that the risk of accidents for cyclists, measured per distance travelled, is approximately 20 times  
73 higher than that for vehicle drivers(1). To address this problem, researchers in the United States  
74 developed a comprehensive bicycle route safety rating model with a focus on injury severity (4).  
75 This model evaluates multiple operational and physical aspects such as traffic volume, population  
76 density, highway classification, lane width, and the presence of one-way streets. In addition, it is  
77 capable of predicting the severity of injuries due to motor vehicle–related crashes at specific  
78 locations (4). Another finding was that a route is considered adequately safe if it includes  
79 geometric factors that enhance safety (4). This model can aid urban planners and public officials  
80 in creating infrastructure such as bike lanes and implementing strict lane policies to improve  
81 cyclist safety (4). Implementing bike lanes has been demonstrated to reduce crash rates by up to  
82 40% among adult cyclists (5). One study found that roundabouts with dedicated cycle tracks  
83 significantly lower the risk of injury for cyclists compared to those without such bicycle  
84 infrastructure. One study regarding roundabouts indicated that roundabouts with cycle tracks  
85 significantly reduced injury risk for cyclists compared with those lacking bicycle infrastructure (6).  
86 Furthermore, adequate night-time lighting on rural roads has the potential to prevent over half  
87 of all cyclist injuries (7). Bicycle crashes can also impose a significant burden on healthcare

88 expenses. Elvik and Sundfør (8) have discussed the economic implications and healthcare  
89 expenditures associated with bicycle accidents. For instance, in Belgium, the average cost of  
90 bicycle accidents per case is estimated at 841 euros (9). In the Netherlands, the total annual cost  
91 has been reported as €410.7 million (10).

92 Although intersectional crashes are generally more frequent than non-intersectional ones, in  
93 2020, 64% of fatal crashes involving cyclists occurred on road segments, defined as areas 20  
94 meters away from intersections, whereas only 26% of such fatalities occurred at intersections  
95 (11). Bil et al. demonstrated that car drivers, when at fault for crashes, often cause more serious  
96 consequences for cyclists on straight road sections (12). In crashes occurring on road segments,  
97 several factors contribute to high injury severity, including being in a rural region with an elevated  
98 speed limit, male gender, and cyclist age of >55 years (13). Another identified risk factor is  
99 bicycling on roads against oncoming traffic (14).

100 Although relevant research has shed light on risk factors for bicycle crashes at intersections,  
101 few studies have explicitly investigated crashes on road segments. Bicycle crashes on road  
102 segments remain a substantial issue for public health concern. This study aims to fill a critical gap  
103 by conducting a thorough examination of the risk factors associated with three distinct bicycle  
104 crash types: overtaking, rear-end, and door crashes that occur on road segments. Studies that  
105 have examined bicycle crashes relatively broadly, without distinguishing crash types, have  
106 identified several key factors—including vehicle volume (15), traffic density (16), number of lanes  
107 (16), access points along road segments (15), shoulder and median widths (15), parking space  
108 availability (15, 16), length of continuous two-way left-turn lanes (15), and pavement type (17)—  
109 all of which contribute to bicycle crashes on road segments. [One notable study has examined the](#)



110 ~~risk factors for overtaking, rear-end, and door crashes~~ ~~Two exceptional work have examined risk~~  
111 ~~factors for overtaking, rear end, and door crashes~~ (18). Specifically, Pai identified buses and  
112 coaches as common crash partners in overtaking crashes, poor visibility, traversing manoeuvres,  
113 and teenage cyclists as risk factors for rear-end crashes, and built-up areas as a risk factor for  
114 door crashes(18) . In addition, another study linked the speed of a passing vehicle to increased  
115 severity of cyclist injury in overtaking crashes (19). The high mortality rate from crashes on  
116 road segments underscores the significant risks linked to overtaking, rear-end, and door  
117 crashes. Overtaking, involving high-speed maneuvers, greatly increases the likelihood of  
118 severe accidents. Rear-end crashes, frequently triggered by sudden stops or aggressive  
119 tailgating, pose a persistent threat to cyclists. Furthermore, injuries sustained by cyclists  
120 striking an opening car door can be devastating due to the impacts from the door, ground, or  
121 vehicles behind. These critical issues highlight the urgent need for identifying risk factors for  
122 these crashes. The high mortality rate from crashes on road segments underscores the significant  
123 risks linked to overtaking, rear end collisions, and door crashes. Overtaking, involving high speed  
124 maneuvers, greatly increases the likelihood of severe accidents. Rear end collisions, frequently  
125 triggered by sudden stops or aggressive tailgating, pose a persistent threat to cyclists.  
126 Furthermore, door crashes introduce serious hazards in already dangerous conditions. These  
127 critical issues highlight the urgent need for substantial improvements in road design, driving  
128 practices, and safety features to effectively mitigate these risks.

Formatted: No underline

Formatted: English (United States)

129 The primary objective of the present study, an extension of our previous ~~study, study,~~ was to  
130 analyse police-reported crash data from additional years to determine whether the risk factors  
131 for these three crash types remained unchanged. The study addresses a critical gap in current

132 research, focusing on crashes specifically occurring on road segments. Existing literature offers  
133 limited insights into these crash types, highlighting a crucial need for targeted investigations.  
134 These crashes have the potential for severe impacts, involving complex dynamics that demand a  
135 nuanced understanding for effective mitigation strategies. By exploring these factors, our  
136 research aims to significantly enhance cyclist safety within this particular context. Furthermore,  
137 we aimed to untangle the joint associations of several factors—including light conditions, urban  
138 versus rural settings, vehicle types, and rider and driver characteristics—with these three crash  
139 types.

140

## 141 **Material and Methods**

### 142 **Crash data source**

143 The present investigation utilised data from 01/01/1991 to 31/12/2020, obtained from the  
144 United Kingdom’s official road traffic casualty database, STATS19. Police record such data either  
145 at crash scenes or within 30 days of each crash. The UK’s Department for Transport compiles the  
146 data, which the United Kingdom Data Archive then maintains and distributes. The dataset  
147 encompasses a variety of variables, including crash circumstances (e.g., time and date, weather  
148 conditions, road and light conditions, posted speed limit, road type), vehicle and driver  
149 characteristics, demographic details of the drivers, precrash manoeuvres of the vehicles, and the  
150 initial impact point of the vehicle. Additionally, the dataset contains demographic information  
151 and details regarding injury severity for each casualty. This study adhered to the STROBE  
152 (strengthening the reporting of observational studies in epidemiology) reporting guidelines. (20)

153 The data that support the findings of this study are openly available at

Formatted: Indent: First line: 2 ch

154 <https://figshare.com/ndownloader/files/48173452>.

155 Injury severity in the aforementioned dataset is divided into three categories, namely slight,  
156 serious, and fatal. Fatal injuries refer to those leading to death within 30 days of the accident.  
157 Serious injuries include conditions such as fractures, internal injuries, severe cuts and lacerations,  
158 concussions, and any injury requiring hospitalisation. Slight injuries include sprains, bruises, and  
159 minor cuts, as well as mild shock requiring roadside attention. The exclusive focus of this study  
160 was crashes leading to cyclist casualties.

161 As shown in Figure 1, this study analysed 1,366,196 crashes involving bicycles and other  
162 vehicles. Initially, 1,235,032 junction cases were excluded. From the remaining 131,164 bicycle  
163 segment crashes, 3,527 were further excluded because of incomplete demographic data for the  
164 cyclist and missing speed limit information, leaving a valid cohort of 127,637 bicycle segment  
165 crashes for analysis. Within this cohort, this study identified 18,350 overtaking crashes, 44,962  
166 rear-end crashes, 6,363 door crashes, and 57,962 other types of crashes.



**Figure 1. Flowchart of the study sample selection process.**

<sup>a</sup>Listed excluded criteria are nonexclusive; thus, the sum of the total may exceed 3,527.

<sup>b</sup>Other crashes include reversing crashes and head-on crashes.

### Classification of crash types

As shown in Figure 2, an overtaking crash is defined as a crash where a motorised vehicle overtakes and impacts with a bicycle, which may be travelling straight, overtaking another vehicle, changing lanes, or turning. A rear-end crash occurs when a following vehicle impacts with the rear of a bicycle. A door crash involves a bicycle either being struck by or striking the opening door of an automobile. These three crash types were described using schematics in our previous study(18) .

Formatted: Indent: First line: 2 ch



Figure 2. Illustrative diagram of the three crash types

### Data analysis Data collection

For the present study, the three crash types of focus (overtaking, rear-end, and door crashes) were the binary-dependent variables. The collected data encompassed the following factors: lighting conditions on the roadway at the time of the crash (daylight, darkness-lit, darkness-unlit), the speed limit at the crash scene (rural:  $\geq 40$  miles per hour [mph]; urban: 20–30 mph), the time of day categorised into four periods according to traffic volume (midnight: 00:00–06:00; rush hours: 07:00–08:00 and 17:00–18:00; nonrush hours: 09:00–16:00; and evening: 19:00–23:00), and the day of the week (weekday or weekend day). The demographic details of cyclist casualties encompassed age ( $\leq 18$ , 19–40, 41–64, or  $\geq 65$  years) and sex (male or female). Finally, the demographic details of the crash partner included the type of vehicle (identified as a taxi, private hire car, car, bus, or heavy goods vehicle [HGV]), age ( $\leq 18$ , 19–40, 41–64, or  $\geq 65$  years) and sex (male or female). On a cautionary note, we removed junction cases to avoid the variability

Formatted: Indent: First line: 2 ch

193 introduced when exogenous factors, such as junction geometry and control measures, are  
194 present at junctions. Furthermore, the cases involving other cyclists and motorcyclists were  
195 removed as we focused on vehicle-cycle crashes only. Missing data on sex, age, or speed limits  
196 were also excluded in the analysis. Excluding these data may impact our results in a marginal  
197 scale, as these data are likely to be single-bicycle crashes that in nature be underreported in  
198 police crash dataset (21).

199

## 200 **Statistical analysis**

201 This study employed the ~~chi~~Chi-squared test to examine the associations between crash type  
202 and other factors, including cyclist or motorist characteristics, vehicle features, roadway  
203 conditions, and temporal variables. We initially utilized descriptive statistics to examine the  
204 distribution of crash types across various variables such as lighting conditions, speed limit, time  
205 of day, and day of the week. Demographic details concerning cyclist casualties encompassed age  
206 and sex, while information about the crash partner included vehicle type, age, and sex. This  
207 preliminary analysis provided a general picture of basic characteristics of the data and  
208 identification of potential patterns. For inferential analysis, we applied the Chi-squared test to  
209 investigate associations between crash type and various factors, including cyclist and motorist  
210 characteristics, vehicle features, roadway conditions, and temporal variables. We then estimated  
211 crude odds ratios by estimating univariate logistic regression and adjusted odds ratios by  
212 multivariate logistic models, respectively. ~~We initially utilized descriptive statistics to examine~~  
213 ~~the distribution of crash types across various variables such as lighting conditions, speed limit,~~  
214 ~~time of day, and day of the week.~~ Initially, we examined the distribution of three crash types

215 across various variables to explore their relationships with a binary outcome. These variables  
216 included lighting conditions, speed limit, time of day, and day of the week. Demographic details  
217 concerning cyclist casualties encompassed age and sex, while information about the crash  
218 partner included vehicle type, age, and sex. This preliminary analysis helped us understand the  
219 basic characteristics of the data and identify potential patterns. For inferential analysis, This  
220 approach allowed us to identify significant predictors while controlling for potential confounding  
221 variables. we applied the Chi-squared test to investigate associations between crash type and  
222 various factors, including cyclist and motorist characteristics, vehicle features, roadway  
223 conditions, and temporal variables. Specifically, we explored relationships between crash types  
224 and binary outcomes related to variables such as lighting conditions and speed limits. We set a  
225 significance level of  $p < 0.2$  to include risk factors in our multivariate analysis [23]. Adjusted odds  
226 ratios (AORs) were computed using multivariate logistic regression with backward selection. (22)

227 The multivariate logistic regression model equation was specified as:

$$\log\left(\frac{P(Y = 1)}{1 - P(Y = 1)}\right) = \beta_0 + \beta_1 X_1 + \beta_2 X_2$$

229 where  $P(Y = 1)$  denotes the probability of the outcome,  $\beta_0, \beta_1, \beta_2, \dots, \beta_p$  are the coefficients to be  
230 estimated, and  $X_1, X_2, \dots, X_p$  represent the predictor variables.

231 Before estimating the model, assumptions of logistic regression, such as linearity of the logit,  
232 absence of multicollinearity, and independence of observations, were evaluated. An odds ratio  
233 (OR) greater than 1 indicated a positive association between the independent variable and the  
234 occurrence rate, while an OR less than 1 indicated a negative association. An OR of 1 suggested

Formatted: Indent: First line: 2 ch

235 no association between the variables of interest and the outcomes. Additionally, joint effect  
 236 analysis was employed to assess the risk associated with the combination of variables across the  
 237 three types of crashes. All statistical analyses were conducted using SPSS Statistics version 25 for  
 238 Windows (IBM Corp., Armonk, New York, USA). A *p* value lower than 0.05 in two-tailed tests was  
 239 considered statistically significant.

240

241 **Results**

242 **Population characteristics**

243 Tables 1, 2, and 3 present the distributions of overtaking, rear-end, and door crashes,  
 244 respectively, in relation to multiple independent variables. These data revealed that a significant  
 245 proportion of bicycle crashes occurred in daylight (82.3%), occurred in urban settings (78.5%),  
 246 occurred during nonrush hours (48.3%), occurred on weekdays (77.5%), involved cyclists aged  
 247 under 18 years (40.1%), and involved male cyclists (81.3%). Additionally, most crashes involved  
 248 cars as crash partners (83.6%), and crash partners were predominately aged 19–40 years (38.5%)  
 249 and were male (76.4%). Table 1 highlights an overrepresentation in bicycle overtaking crashes  
 250 for certain variables, namely unlit darkness (19.5%), rural areas (24.8%), midnight hours (17.7%),  
 251 buses or HGVs as crash partners (24.7%), and elderly crash partners (21.5%) and male crash  
 252 partners (16.0%). These results were revealed to be statistically significant by the chi-squared  
 253 test ( $p < 0.01$ ).

Formatted: Indent: First line: 2 ch

254

255 **Table 1.** Distribution of overtaking crashes according to a set of independent variables

| Variable | Total<br>(n=127,637) | Overtaking<br>crashes<br>(n=18,350) | Non-overtaking<br>crashes<br>(n=109,287) | $\chi^2$ test<br><i>p</i> value |
|----------|----------------------|-------------------------------------|------------------------------------------|---------------------------------|
|----------|----------------------|-------------------------------------|------------------------------------------|---------------------------------|



|                                           |                 |                  |                |        |
|-------------------------------------------|-----------------|------------------|----------------|--------|
| <b>Light conditions, n (%)</b>            |                 |                  |                | <0.001 |
| Daylight                                  | 105,053 (82.3%) | 15,283 (14.655%) | 89,770 (85.5%) |        |
| Darkness-lit                              | 16,543 (13.0%)  | 1,889 (11.429%)  | 14,654 (88.6%) |        |
| Darkness-unlit                            | 6,041 (4.7%)    | 1,178 (19.509%)  | 4,863 (80.5%)  |        |
| <b>Speed limit, n (%)</b>                 |                 |                  |                | <0.001 |
| Rural (≥ 40 mph)                          | 27,395 (21.5%)  | 6,805 (24.8%)    | 20,590 (75.6%) |        |
| Urban (20–30 mph)                         | 100,242 (78.5%) | 11,545 (11.5%)   | 88,697 (88.5%) |        |
| <b>Crash time (h), n (%)</b>              |                 |                  |                | <0.001 |
| Midnight (00:00–06:00)                    | 4,810 (3.8%)    | 852 (17.7%)      | 3,958 (82.3%)  |        |
| Rush hours (07:00–08:00/17:00–18:00)      | 41,619 (32.6%)  | 5,685 (13.7%)    | 35,934 (86.3%) |        |
| Nonrush hours (09:00–16:00)               | 61,696 (48.3%)  | 9,386 (15.2%)    | 52,310 (84.8%) |        |
| Evening (19:00–23:00)                     | 19,512 (15.3%)  | 2,427 (12.4%)    | 17,085 (87.6%) |        |
| <b>Crash day, n (%)</b>                   |                 |                  |                | 0.094  |
| Weekend                                   | 28,730 (22.5%)  | 4,218 (14.7%)    | 24,512 (85.2%) |        |
| Weekday                                   | 98,907 (77.5%)  | 14,132 (14.3%)   | 84,775 (85.7%) |        |
| <b>Cyclist's age (years), n (%)</b>       |                 |                  |                | <0.001 |
| ≤18                                       | 51,193 (40.1%)  | 5,220 (10.2%)    | 45,973 (89.8%) |        |
| 19–40                                     | 45,760 (35.9%)  | 7,108 (15.5%)    | 38,652 (84.5%) |        |
| 41–64                                     | 26,052 (20.4%)  | 5,012 (19.2%)    | 21,040 (80.8%) |        |
| ≥65                                       | 4,632 (3.6%)    | 1,010 (21.8%)    | 3,622 (78.2%)  |        |
| <b>Cyclist's sex, n (%)</b>               |                 |                  |                | <0.001 |
| Male                                      | 103,766 (81.3%) | 14,746 (14.2%)   | 89,020 (85.8%) |        |
| Female                                    | 23,871 (18.7%)  | 3,604 (15.1%)    | 20,267 (84.9%) |        |
| <b>Crash partner, n (%)</b>               |                 |                  |                | <0.001 |
| Taxi/Private hire car                     | 2,588 (2.0%)    | 208 (8.0%)       | 2,380 (92.0%)  |        |
| Car                                       | 106,668 (83.6%) | 13,599 (12.8%)   | 93,069 (87.3%) |        |
| Bus/Heavy goods vehicle                   | 18,381 (14.4%)  | 4,543 (24.7%)    | 13,838 (75.3%) |        |
| <b>Crash partner's age (years), n (%)</b> |                 |                  |                | <0.001 |
| ≤18                                       | 2,415 (1.9%)    | 281 (11.6%)      | 2,134 (88.4%)  |        |
| 19–40                                     | 49,103 (38.5%)  | 5,398 (11.0%)    | 43,705 (89.0%) |        |
| 41–64                                     | 35,598 (27.9%)  | 3,973 (11.2%)    | 31,625 (88.8%) |        |
| ≥65                                       | 40,521 (31.8%)  | 8,698 (21.5%)    | 31,823 (78.5%) |        |
| <b>Crash partner's sex, n (%)</b>         |                 |                  |                | <0.001 |
| Male                                      | 97,447 (76.4%)  | 15,584 (16.0%)   | 81,863 (84.0%) |        |
| Female                                    | 30,190 (23.8%)  | 2,766 (9.2%)     | 27,424 (90.8%) |        |

256

257

Several variables in Table 2 reveal significant differences between rear-end crashes and non-

Formatted: Indent: First line: 0.31", Line spacing: Double

258

rear-end crashes. Specifically, a higher proportion of rear-end crashes occurred under darkness-

259

unlit conditions (50.2%) compared to darkness-lit conditions (37.5%). Additionally, rear-end

260

crashes were more prevalent in rural areas with speed limits of ≥ 40 mph (43.0%) compared to

261

urban areas with speed limits of 20–30 mph (33.1%). Crashes involving crash partners aged ≥ 65

262 accounted for 39.7% of rear-end crashes, which was higher compared to other age groups (age  
 263 41–64: 33.0% and ≤18: 36.0%). Furthermore, rear-end crashes were more likely to occur during  
 264 midnight (47.6%) compared to rush hours (36.3%). Taxis [or private hire cars](#) were frequently  
 265 involved in rear-end crashes (42.4%), as were male crash partners (36.8%). These findings  
 266 highlight the significant influence of various factors on the likelihood of rear-end crashes.  
 267 Variables such as darkness-unlit conditions, higher speed limits in rural areas, crash time, and  
 268 characteristics of the crash partner all emerged as significant determinants. [Specifically, rear-end  
 269 crashes were notably more prevalent under darkness-unlit conditions, in rural areas with higher  
 270 speed limits, during midnight hours, and involving certain characteristics of crash partners.](#)  
 271 Importantly, these associations were statistically significant, as indicated by the Chi-squared test  
 272 ( $p < 0.001$ ).

273  
 274 **Table 2.** Distribution of rear-end crashes according to a set of independent variables

| Variable                             | Total<br>(n=127,637) | Rear-end<br>crashes<br>(n=44,962) | Non-rear-end<br>crashes<br>(n=82,675) | $\chi^2$ test<br>p value |
|--------------------------------------|----------------------|-----------------------------------|---------------------------------------|--------------------------|
| <b>Light conditions, n (%)</b>       |                      |                                   |                                       | <0.001                   |
| Daylight                             | 105,053 (82.3%)      | 35,726 (34.1%)                    | 69,333 (66.0%)                        |                          |
| Darkness-lit                         | 16,543 (13.0%)       | 6,204 (37.5%)                     | 10,339 (63.5%)                        |                          |
| Darkness-unlit                       | 6,041 (4.73%)        | 3,032 (50.19%)                    | 3,003 (49.71%)                        |                          |
| <b>Speed limit, n (%)</b>            |                      |                                   |                                       | <0.001                   |
| Rural (≥ 40 mph)                     | 27,395 (21.5%)       | 11,788 (43.0%)                    | 15,607 (57.0%)                        |                          |
| Urban (20–30 mph)                    | 100,242 (78.5%)      | 33,174 (33.1%)                    | 67,068 (66.9%)                        |                          |
| <b>Crash time (h), n (%)</b>         |                      |                                   |                                       | <0.001                   |
| Midnight (00:00–06:00)               | 4,810 (3.8%)         | 2,289 (47.6%)                     | 2,521 (52.4%)                         |                          |
| Rush hours (07:00–08:00/17:00–18:00) | 41,619 (32.6%)       | 15,089 (36.3%)                    | 26,530 (63.7%)                        |                          |
| Nonrush hours (09:00–16:00)          | 61,696 (48.3%)       | 20,723 (33.6%)                    | 40,973 (66.4%)                        |                          |
| Evening (19:00–23:00)                | 19,512 (15.3%)       | 6,861 (36.2%)                     | 12,651 (64.9%)                        |                          |
| <b>Crash day, n (%)</b>              |                      |                                   |                                       | <0.001                   |
| Weekend                              | 28,730 (22.5%)       | 9,485 (33.0%)                     | 19,245 (67.0%)                        |                          |
| Weekday                              | 98,907 (77.5%)       | 35,477 (35.9%)                    | 63,430 (64.1%)                        |                          |
| <b>Cyclist's age (years), n (%)</b>  |                      |                                   |                                       | <0.001                   |
| ≤18                                  | 51,193 (40.1%)       | 13,446 (26.3%)                    | 37,747 (73.7%)                        |                          |
| 19–40                                | 45,760 (35.9%)       | 19,102 (41.7%)                    | 26,658 (58.3%)                        |                          |
| 41–64                                | 26,052 (20.4%)       | 10,619 (40.8%)                    | 15,433 (59.2%)                        |                          |
| ≥65                                  | 4,632 (3.6%)         | 1,795 (38.8%)                     | 2,837 (61.3%)                         |                          |

|                                           |                 |                |                |        |
|-------------------------------------------|-----------------|----------------|----------------|--------|
| <b>Cyclist's sex, n (%)</b>               |                 |                |                | <0.001 |
| Male                                      | 103,766 (81.3%) | 37,175 (35.8%) | 66,591 (64.2%) |        |
| Female                                    | 23,871 (18.7%)  | 7,787 (32.6%)  | 16,084 (67.4%) |        |
| <b>Crash partner, n (%)</b>               |                 |                |                | <0.001 |
| Taxi/Private hire car                     | 2,588 (2.0%)    | 1,096 (42.4%)  | 1,492 (57.7%)  |        |
| Car                                       | 106,668 (83.6%) | 37,202 (34.9%) | 71,342 (66.9%) |        |
| Bus/Heavy goods vehicle                   | 18,381 (14.4%)  | 6,664 (36.3%)  | 9,841 (53.5%)  |        |
| <b>Crash partner's age (years), n (%)</b> |                 |                |                | <0.001 |
| ≤18                                       | 2,415 (1.9%)    | 870 (36.0%)    | 1,545 (64.0%)  |        |
| 19–40                                     | 49,103 (38.5%)  | 16,282 (33.2%) | 32,821 (66.8%) |        |
| 41–64                                     | 35,598 (27.9%)  | 11,736 (33.0%) | 23,862 (67.0%) |        |
| ≥65                                       | 40,521 (31.8%)  | 16,074 (40.0%) | 24,447 (60.3%) |        |
| <b>Crash partner's sex, n (%)</b>         |                 |                |                | <0.001 |
| Male                                      | 97,447 (76.6%)  | 35,828 (36.8%) | 61,619 (63.2%) |        |
| Female                                    | 30,190 (23.7%)  | 9,134 (30.3%)  | 21,056 (69.7%) |        |

275  
276 As shown in Table 3, several variables can contribute to door crashes involving bicycles. Door  
277 crashes predominantly occurred in urban areas with speed limits of 20-30 mph (6.2%), while a  
278 significantly lower proportion occurred in rural areas with speed limits  $\geq$  40 mph (0.5%). These  
279 crashes were overrepresented during non-rush hours (5.5%) and rush hours (4.9%) compared to  
280 evening (4.3%) and midnight (2.4%). Cyclists were more frequently involved in door crashes on  
281 weekdays (5.4%) than weekends (3.7%). As many as 8.2% of all female cyclists were involved in  
282 door crashes, which is higher than the involvement rate among males (4.2%). Taxi and private  
283 hire cars were overinvolved in door crashes (10.6%) compared to cars (5.2%) and buses/heavy  
284 goods vehicles (3.1%). Crash partners aged  $\leq$ 18 years (5.2%) and 19-40 years (5.3%) were  
285 disproportionately involved in door crashes compared to older age groups, and female crash  
286 partners were overrepresented in door crashes (7.4%) compared to males (4.2%). These results  
287 were statistically significant, as indicated by the Chi-squared test ( $p < 0.001$ ). They suggest that  
288 various factors—including traffic conditions (rural areas, crash time), cyclist demographics  
289 (younger age, [genderfemale](#)), and characteristics of the crash partner (taxi/private hire cars)—  
290 significantly contribute to the likelihood of door crashes involving cyclists.

291 **Table 3.** Distribution of door crashes according to a set of independent variables

| Variable                                  | Total<br>(n=127,637) | Door crashes<br>(n=6,363) | Non-door<br>crashes<br>(n=121,274) | $\chi^2$ test<br>p value |
|-------------------------------------------|----------------------|---------------------------|------------------------------------|--------------------------|
| <b>Light conditions, n (%)</b>            |                      |                           |                                    | <0.001                   |
| Daylight                                  | 105,053 (82.3%)      | 5,192 (4.9%)              | 99,861 (95.1%)                     |                          |
| Darkness-lit                              | 16,543 (13.0%)       | 1,031 (6.2%)              | 15,512 (93.8%)                     |                          |
| Darkness-unlit                            | 6,041 (4.7%)         | 140 (2.3%)                | 5,901 (97.7%)                      |                          |
| <b>Speed limit, n (%)</b>                 |                      |                           |                                    | <0.001                   |
| Rural ( $\geq$ 40 mph)                    | 27,395 (21.5%)       | 123 (0.5%)                | 27,272 (99.6%)                     |                          |
| Urban (20–30 mph)                         | 100,242 (78.5%)      | 6,240 (6.2%)              | 94,002 (93.8%)                     |                          |
| <b>Crash time (h), n (%)</b>              |                      |                           |                                    | <0.001                   |
| Midnight (00:00–06:00)                    | 4,810 (3.8%)         | 113 (2.4%)                | 4,697 (97.7%)                      |                          |
| Rush hours (07:00–08:00/17:00–18:00)      | 41,619 (32.6%)       | 2,056 (4.9%)              | 39,563 (95.1%)                     |                          |
| Nonrush hours (09:00–16:00)               | 61,696 (48.3%)       | 3,363 (5.5%)              | 58,333 (94.6%)                     |                          |
| Evening (19:00–23:00)                     | 19,512 (15.3%)       | 831 (4.3%)                | 18,681 (95.7%)                     |                          |
| <b>Crash day, n (%)</b>                   |                      |                           |                                    | <0.001                   |
| Weekend                                   | 28,730 (22.5%)       | 1,072 (3.7%)              | 27,658 (96.3%)                     |                          |
| Weekday                                   | 98,907 (77.5%)       | 5,291 (5.4%)              | 93,616 (94.7%)                     |                          |
| <b>Cyclist's age (years), n (%)</b>       |                      |                           |                                    | <0.001                   |
| $\leq$ 18                                 | 51,193 (40.1%)       | 802 (1.6%)                | 50,391 (98.4%)                     |                          |
| 19–40                                     | 45,760 (35.9%)       | 3,474 (7.6%)              | 42,286 (93.4%)                     |                          |
| 41–64                                     | 26,052 (20.4%)       | 1,773 (6.8%)              | 24,279 (93.2%)                     |                          |
| $\geq$ 65                                 | 4,632 (3.6%)         | 314 (6.8%)                | 4,318 (93.2%)                      |                          |
| <b>Cyclist's sex, n (%)</b>               |                      |                           |                                    | <0.001                   |
| Male                                      | 103,766 (81.3%)      | 4,404 (4.2%)              | 99,362 (95.8%)                     |                          |
| Female                                    | 23,871 (18.7%)       | 1,959 (8.2%)              | 21,912 (91.8%)                     |                          |
| <b>Crash partner, n (%)</b>               |                      |                           |                                    | <0.001                   |
| Taxi/Private hire car                     | 2,588 (2.0%)         | 273 (10.6%)               | 2,315 (89.5%)                      |                          |
| Car                                       | 106,668 (83.6%)      | 5,514 (5.2%)              | 101,154 (94.8%)                    |                          |
| Bus/Heavy goods vehicle                   | 18,381 (14.4%)       | 576 (3.1%)                | 17,805 (96.9%)                     |                          |
| <b>Crash partner's age (years), n (%)</b> |                      |                           |                                    | <0.001                   |
| $\leq$ 18                                 | 2,415 (1.9%)         | 1,62 (5.2%)               | 2,253 (93.3%)                      |                          |
| 19–40                                     | 49,103 (38.5%)       | 2,585 (5.3%)              | 46,518 (94.7%)                     |                          |
| 41–64                                     | 35,598 (27.9%)       | 1,887 (5.3%)              | 33,711 (94.7%)                     |                          |
| $\geq$ 65                                 | 40,521 (31.8%)       | 1,729 (4.3%)              | 38,792 (95.7%)                     |                          |
| <b>Crash partner's sex, n (%)</b>         |                      |                           |                                    | <0.001                   |
| Male                                      | 97,447 (76.6%)       | 4,123 (4.2%)              | 93,324 (95.8%)                     |                          |
| Female                                    | 30,190 (23.7%)       | 2,240 (7.4%)              | 27,950 (92.6%)                     |                          |

292

293

294 **Risk factors for the three crash types**

295

296 [Table 4 presents the results of the univariate logistic regression models. For overtaking crashes,](#)297 [lit conditions during darkness were associated with a lower likelihood of crashes compared to](#)298 [daylight \(AOR 0.80, 95% CI: 0.77–0.82,  \$p < 0.001\$ \), while unlit conditions slightly increased the risk](#)299 [\(AOR 0.93, 95% CI: 0.99–0.95,  \$p = 0.001\$ \). Urban roads with lower speed limits \(20–30 mph\)](#)

300 significantly reduced the odds of overtaking crashes compared to rural roads (AOR 0.40, 95% CI:  
301 0.37–0.47,  $p < 0.001$ ). In terms of cyclist demographics, older cyclists ( $\geq 65$  years) were at a  
302 notably higher risk (AOR 1.84, 95% CI: 1.78–1.97,  $p < 0.001$ ), and male cyclists were more likely  
303 to be involved than female cyclists (AOR 1.14, 95% CI: 1.10–1.17,  $p < 0.001$ ). Additionally, crashes  
304 involving buses or heavy goods vehicles increased the likelihood of overtaking crashes (AOR 1.31,  
305 95% CI: 1.24–1.41,  $p < 0.001$ ).  
306 For rear-end crashes, both lit (AOR 1.11, 95% CI: 1.08–1.14,  $p = 0.036$ ) and unlit (AOR 1.50, 95%  
307 CI: 1.46–1.56,  $p < 0.001$ ) darkness conditions were associated with a higher likelihood of  
308 crashes compared to daylight. Urban roads were linked to a decreased risk of rear-end crashes  
309 compared to rural roads (AOR 0.75, 95% CI: 0.73–0.79,  $p < 0.001$ ). The likelihood of rear-end  
310 crashes was significantly higher during midnight (AOR 1.34, 95% CI: 1.30–1.39,  $p < 0.001$ ) and  
311 rush hours (AOR 1.16, 95% CI: 1.12–1.20,  $p = 0.003$ ). As with overtaking crashes, older cyclists  
312 had an elevated risk (AOR 1.54, 95% CI: 1.51–1.80,  $p < 0.001$ ), while males had slightly reduced  
313 odds compared to females (AOR 0.81, 95% CI: 0.79–0.91,  $p < 0.001$ ). Crashes involving buses or  
314 heavy goods vehicles were slightly more likely to result in rear-end crashes (AOR 1.05, 95% CI:  
315 1.01–1.15,  $p < 0.001$ ). For door crashes, lit conditions during darkness were associated with  
316 increased odds of crashes (AOR 1.19, 95% CI: 1.17–1.26,  $p < 0.001$ ), whereas unlit conditions  
317 did not show a significant difference compared to daylight (AOR 0.74, 95% CI: 0.72–1.02,  $p =$   
318 0.198). Urban environments with lower speed limits were strongly linked to a higher risk of  
319 door crashes (AOR 15.3, 95% CI: 14.6–18.1,  $p < 0.001$ ). Nonrush hours were also associated with  
320 significantly higher odds (AOR 1.78, 95% CI: 1.68–1.89,  $p < 0.001$ ). Older cyclists ( $\geq 65$  years)  
321 faced a substantially increased risk (AOR 5.13, 95% CI: 5.01–5.83,  $p < 0.001$ ), and male cyclists

Formatted: Left, Indent: First line: 0 ch

322 were more likely to be involved than females (AOR 1.48, 95% CI: 1.33–1.67,  $p < 0.001$ ).

323 Interestingly, crashes involving buses or heavy goods vehicles reduced the likelihood of door  
324 crashes compared to cars (AOR 0.433, 95% CI: 0.40–0.51,  $p < 0.001$ ).

325 Table 4 presents the logistic regression model results. Regarding overtaking crashes, the  
326 identified risk factors included daylight conditions (adjusted odds ratio [AOR] = 1.233, 95%  
327 confidence interval [CI] = 1.162–1.3091;  $p < 0.001$ ), speed limits of  $\geq 40$  mph (AOR = 2.2438, 95%  
328 CI = 2.1596–2.320;  $p < 0.001$ ), nonrush hours (AOR = 1.091, 95% CI 1.031–1.154;  $p = 0.003$ ), cyclists  
329 aged  $\geq 65$  years (AOR = 1.7859, 95% CI = 1.6549–1.931;  $p < 0.001$ ), female cyclists (AOR = 1.1106,  
330 95% CI = 1.062–1.153), When HGVs are involved as crash partners, there is a 2.9 times greater  
331 likelihood of being involved in an overtaking crash (AOR = 2.87, 95% CI = 2.47–3.32;  $p <$   
332 0.001). HGVs as crash partners (AOR = 2.867, 95% CI = 2.473–3.323;  $p < 0.001$ ). Elderly crash  
333 partners also demonstrated a doubled risk, with an AOR of 2.01 (95% CI = 1.94–2.09;  $p <$   
334 0.001). lderly crash partners (AOR = 2.013, 95% CI = 1.937–2.092;  $p < 0.001$ ), and male crash  
335 partners (AOR = 1.353, 95% CI = 1.292–1.4216;  $p < 0.001$ ).

336 For rear-end crashes, noteworthy risk factors included unlit darkness (AOR = 1.4869, 95% CI  
337 = 1.404–1.573;  $p < 0.001$ ), speed limits of  $\geq 40$  mph (AOR = 1.3215, 95% CI = 1.2877–1.354;  
338  $p < 0.001$ ), weekdays (AOR = 1.090, 95% CI = 1.0596–1.122;  $p < 0.001$ ), midnight hours (AOR =  
339 1.2769, 95% CI = 1.190–1.354;  $p < 0.001$ ), and taxis as crash partners (AOR = 1.2869, 95% CI =  
340 1.1869–1.394;  $p < 0.001$ ).

341 Regarding door crashes, significant risk factors included lit darkness (AOR = 1.373, 95% CI =  
342 1.141–1.651;  $p < 0.001$ ), speed limits of 20–30 mph (AOR = 16.1859, 95% CI = 13.514–19.382;  
343  $p < 0.001$ ), weekdays (AOR = 1.2465, 95% CI = 1.162–1.3364;  $p < 0.001$ ), and nonrush hours (AOR =

Formatted: Indent: First line: 1 ch

344 2.912, 95% CI = 2.384–3.556;  $p < 0.001$ ). Additionally, female cyclists (AOR = 1.6875, 95% CI =  
345 1.582–1.774;  $p < 0.001$ ), taxis or private hire cars as crash partners (AOR = 2.70695, 95% CI =  
346 2.310–3.145;  $p < 0.001$ ), male crash partners (AOR = 1.373, 95% CI = 1.30296–1.4655;  $p < 0.001$ ),  
347 and crash partners aged 41–64 years (AOR = 1.8556, 95% CI = 1.6325–2.1217;  $p < 0.001$ ) were  
348 associated with door crashes.

349 Table 5 displays the results of the multivariate logistic regression analysis. For overtaking  
350 crashes, for cyclists aged 65 years and older, the adjusted odds ratio (AOR) is 1.79 (95%  
351 confidence interval [CI] = 1.65–1.93;  $p < 0.001$ ), factors associated with a decreased likelihood of  
352 crashes included daylight conditions (adjusted odds ratio [AOR] = 0.81, 95% confidence interval  
353 [CI] = 0.80–0.84;  $p < 0.001$ ), rural area with speed limits of 40 mph or higher (AOR = 0.45, 95% CI  
354 = 0.43–0.47;  $p < 0.001$ ). For cyclists aged 65 years and older, the adjusted odds ratio (AOR) is 1.79  
355 (95% confidence interval [CI] = 1.65–1.93;  $p < 0.001$ ). Furthermore, when heavy goods vehicles  
356 (HGVs) are involved as crash partners, the likelihood of being involved in an overtaking crash  
357 increase by 2.9 times (AOR = 2.87, 95% CI = 2.47–3.32;  $p < 0.001$ ).

358 For rear-end crashes, significant risk factors included darkness or unlit conditions (AOR =  
359 1.49, 95% confidence interval [CI] = 1.40–1.57;  $p < 0.001$ ), crashes occurring on weekdays (AOR  
360 = 1.09, 95% CI = 1.06–1.12;  $p < 0.001$ ), and an increased likelihood of rear-end crashes during  
361 rush hours (AOR = 1.12, 95% CI = 1.09–1.15;  $p < 0.001$ ). In contrast, the risk was lower in urban  
362 areas (AOR = 0.76, 95% CI = 0.74–0.79;  $p < 0.001$ ), using rural areas as the reference.

363 For door crashes, notable risk factors included darkness or lit conditions (AOR = 1.23, 95%  
364 confidence interval [CI] = 1.20–1.24;  $p < 0.001$ ), a strong association with urban areas where  
365 speed limits are between 20 and 30 mph (AOR = 16.2, 95% CI = 13.5–19.4;  $p < 0.001$ ), and crashes

Formatted: Font: (Default) PMingLiU, Font color: Auto

366 [occurring on weekdays \(AOR = 1.25, 95% CI = 1.16–1.34; p < 0.001\)](#). Furthermore, female cyclists  
 367 [exhibited higher odds of being involved in door crashes \(AOR = 1.68, 95% CI = 1.58–1.77; p <](#)  
 368 [0.001\), and interactions with taxis or private hire cars as crash partners significantly increased](#)  
 369 [the likelihood of door crashes \(AOR = 2.71, 95% CI = 2.31–3.15; p < 0.001\)](#). Furthermore, male  
 370 [crash partners were associated with increased odds of door crashes \(AOR = 1.37, 95% CI = 1.30–](#)  
 371 [1.47; p < 0.001\)](#), while crash partners aged 41–64 years also presented a heightened risk (AOR =  
 372 [1.90, 95% CI = 1.81–1.93; p < 0.001\)](#).

373  
 374  
 375  
 376

Formatted: English (United States)

377 **Table 4.** Univariate logistic regression results

Formatted: Indent: Left: -0.2"

| Variable                     | Overtaking crashes    |         | Rear-end crashes     |         | Door crashes      |         |
|------------------------------|-----------------------|---------|----------------------|---------|-------------------|---------|
|                              | AOR (95% CI)          | p value | AOR (95% CI)         | p value | AOR (95% CI)      | p value |
| <b>Light condition</b>       |                       |         |                      |         |                   |         |
| Daylight                     | Ref                   |         | Ref                  |         | Ref               |         |
| Darkness-lit                 | 0.80 (0.77, 0.82)     | <0.001  | 1.11 (1.08, 1.14)    | 0.036   | 1.19 (1.17, 1.26) | <0.001  |
| Darkness-unlit               | 0.93 (0.89, 0.95)     | 0.001   | 1.50 (1.46, 1.56)    | <0.001  | 0.74 (0.72, 1.02) | 0.198   |
| <b>Speed limit</b>           |                       |         |                      |         |                   |         |
| Rural (≥40 mph)              | Ref                   |         | Ref                  |         | Ref               |         |
| Urban (20–30 mph)            | 0.40 (0.37, 0.47)     | <0.001  | 0.75 (0.73, 0.79)    | <0.001  | 15.3 (14.6, 18.1) | <0.001  |
| <b>Crash time</b>            |                       |         |                      |         |                   |         |
| Midnight                     | 1.05 (0.97, 1.10)     | 0.157   | 1.34 (1.30, 1.39)    | <0.001  | 0.39 (0.35, 0.47) | <0.001  |
| Rush hours                   | 1.04 (0.98, 1.08)     | 0.116   | 1.16 (1.12, 1.20)    | 0.003   | 1.36 (1.31, 1.55) | <0.001  |
| Nonrush hours                | 1.12 (1.06, 1.14)     | 0.007   | 1.02 (0.97, 1.13)    | 0.742   | 1.78 (1.68, 1.89) | <0.001  |
| Evening                      | Ref                   |         | Ref                  |         | Ref               |         |
| <b>Crash day</b>             |                       |         |                      |         |                   |         |
| Weekend                      | Ref                   |         | Ref                  |         | Ref               |         |
| Weekday                      | 0.92 (0.90, 1.04)     | 0.341   | 1.08 (1.07, 1.13)    | <0.001  | 1.33 (1.25, 1.36) | <0.001  |
| <b>Cyclist's age (years)</b> |                       |         |                      |         |                   |         |
| ≤18                          | Ref                   |         | Ref                  |         | Ref               |         |
| 19–40                        | 1.28 (1.23, 1.39)     | <0.001  | 1.80 (1.76, 1.99)    | <0.001  | 5.26 (5.20, 5.86) | <0.001  |
| 41–64                        | 1.47 (1.33, 1.61)     | <0.001  | 1.68 (1.64, 1.81)    | <0.001  | 5.66 (5.47, 6.00) | <0.001  |
| ≥65                          | 1.84 (1.78, 1.97)     | <0.001  | 1.54 (1.51, 1.80)    | <0.001  | 5.13 (5.01, 5.83) | <0.001  |
| <b>Cyclist's sex</b>         |                       |         |                      |         |                   |         |
| Male                         | Ref                   |         | Ref                  |         | Ref               |         |
| Female                       | 1.14 (1.10, 1.17)     | <0.001  | 0.81 (0.79, 0.91)    | <0.001  | 1.48 (1.33, 1.67) | <0.001  |
| <b>Crash partner</b>         |                       |         |                      |         |                   |         |
| Taxi/Private hire car        | 0.6328 (0.641, 0.680) | <0.001  | 1.274 (1.243, 1.334) | <0.001  | 1.78 (1.46, 1.82) | <0.001  |
| Car                          |                       |         | Ref                  |         | Ref               |         |

Formatted: Font: Bold

Formatted Table

Formatted Table



|                                    |                   |        |                   |        |                    |        |
|------------------------------------|-------------------|--------|-------------------|--------|--------------------|--------|
| <u>Bus/Heavy goods vehicle</u>     | Ref               | <0.001 | 1.05 (1.01, 1.15) | <0.001 | 0.433 (0.40, 0.51) | <0.001 |
|                                    | 1.31 (1.24, 1.41) |        |                   |        |                    |        |
| <u>Crash partner's age (years)</u> |                   |        |                   |        |                    |        |
| ≤18                                | 1.03 (0.97, 1.21) | 0.251  | 1.15 (1.11, 1.34) | <0.001 | 0.65 (0.62, 0.69)  | <0.001 |
| 19–40                              | Ref               |        | Ref               |        | Ref                |        |
| 41–64                              | 0.93 (0.91, 0.98) | 0.035  | 0.98 (0.97, 1.03) | 0.138  | 0.96 (0.94, 0.99)  | <0.001 |
| ≥65                                | 2.33 (1.99, 2.56) | <0.001 | 1.25 (1.20, 1.31) | <0.001 | 0.51 (0.47, 0.56)  | <0.001 |
| <u>Crash partner's sex</u>         |                   |        |                   |        |                    |        |
| Male                               | 1.28 (1.25, 1.33) | <0.001 | 1.23 (1.15, 1.39) | <0.001 | 1.30 (1.25, 1.53)  | <0.001 |
| Female                             | Ref               |        | Ref               |        | Ref                |        |

378 [Table 4 presents the results of the univariate logistic regression models. In terms of overtaking](#)  
379 [crashes, conditions of darkness with lighting \(AOR 0.80, 95% CI: 0.77–0.82, p < 0.001\) and](#)  
380 [darkness without lighting \(AOR 0.93, 95% CI: 0.89–0.95, p = 0.001\) were linked to a reduced](#)  
381 [likelihood of crashes when compared to daylight conditions. Urban roads with lower speed limits](#)  
382 [\(20–30 mph\) significantly reduced the odds of overtaking crashes compared to rural roads \(AOR](#)  
383 [0.40, 95% CI: 0.37–0.47, p < 0.001\). In terms of cyclist demographics, older cyclists \(≥65 years\)](#)  
384 [were at a notably higher risk \(AOR 1.84, 95% CI: 1.78–1.97, p < 0.001\), and male cyclists were](#)  
385 [more likely to be involved than female cyclists \(AOR 1.14, 95% CI: 1.10–1.17, p < 0.001\).](#)  
386 [Additionally, crashes involving buses or heavy goods vehicles \(HGVs\) increased the likelihood of](#)  
387 [overtaking crashes \(AOR 1.31, 95% CI: 1.24–1.41, p < 0.001\).](#)

388 [For rear-end crashes, both lit \(AOR 1.11, 95% CI: 1.08–1.14, p = 0.036\) and unlit \(AOR 1.50,](#)  
389 [95% CI: 1.46–1.56, p < 0.001\) darkness conditions were associated with a higher likelihood of](#)  
390 [crashes compared to daylight. Urban areas were linked to a decreased risk of rear-end crashes](#)  
391 [compared to rural areas \(AOR 0.75, 95% CI: 0.73–0.79, p < 0.001\). The likelihood of rear-end](#)  
392 [crashes was significantly higher during midnight \(AOR 1.34, 95% CI: 1.30–1.39, p < 0.001\) and](#)  
393 [rush hours \(AOR 1.16, 95% CI: 1.12–1.20, p = 0.003\). As with overtaking crashes, older cyclists](#)  
394 [had an elevated risk \(AOR 1.54, 95% CI: 1.51–1.80, p < 0.001\), while males had slightly reduced](#)  
395 [odds compared to females \(AOR 0.81, 95% CI: 0.79–0.91, p < 0.001\). Crashes involving buses or](#)

Formatted: Indent: First line: 1 ch

396 [heavy goods vehicles were slightly more likely to result in rear-end crashes \(AOR 1.05, 95% CI:](#)  
 397 [1.01–1.15, p < 0.001\).](#)

398 [Regarding door crashes, lit conditions during darkness were associated with increased odds of](#)  
 399 [crashes \(AOR 1.19, 95% CI: 1.17–1.26, p < 0.001\), whereas unlit conditions did not show a](#)  
 400 [significant difference compared to daylight \(AOR 0.74, 95% CI: 0.72–1.02, p = 0.198\). Urban](#)  
 401 [environments with lower speed limits were strongly linked to a higher risk of door crashes \(AOR](#)  
 402 [15.3, 95% CI: 14.6–18.1, p < 0.001\). Older cyclists \(≥65 years\) faced a substantially increased risk](#)  
 403 [\(AOR 5.13, 95% CI: 5.01–5.83, p < 0.001\), and male cyclists were more likely to be involved than](#)  
 404 [females \(AOR 1.48, 95% CI: 1.33–1.67, p < 0.001\). Interestingly, crashes involving buses or heavy](#)  
 405 [goods vehicles reduced the likelihood of door crashes compared to cars \(AOR 0.433, 95% CI:](#)  
 406 [0.40–0.51, p < 0.001\).](#)

Formatted: English (United States)

410 **Table 45.** Multivariate logistic regression results

411

| Variable               | Overtaking crashes       |         | Rear-end crashes         |         | Door crashes              |         |
|------------------------|--------------------------|---------|--------------------------|---------|---------------------------|---------|
|                        | AOR (95% CI)             | p-value | AOR (95% CI)             | p-value | AOR (95% CI)              | p-value |
| <b>Light condition</b> |                          |         |                          |         |                           |         |
| Daylight               | 1.233 (1.162, 1.30931)   | <0.001  | Ref                      |         | 1.14615 (0.95896, 1.370)  | 0.137   |
| Darkness-lit           | Ref                      |         | 1.08509                  | 0.041   | 1.373 (1.141, 1.651)      | 0.001   |
| Darkness-unlit         | 1.152 (1.05906, 1.253)   | 0.001   | 1.48649 (1.404, 1.573)   | <0.001  | Ref                       |         |
| <b>Speed limit</b>     |                          |         |                          |         |                           |         |
| Rural (≥40 mph)        | 2.23824 (2.15916, 2.320) | <0.001  | 1.31532 (1.27728, 1.354) | <0.001  | Ref                       |         |
| Urban (20–30 mph)      | Ref                      |         | Ref                      |         | 16.18519 (12.514, 19.382) | <0.001  |
| <b>Crash time</b>      |                          |         |                          |         |                           |         |
| Midnight               | 1.073 (0.982, 1.173)     | 0.119   | 1.26927 (1.190, 1.354)   | <0.001  | Ref                       |         |
| Rush hours             | 1.05906 (1.002, 1.120)   | 0.043   | 1.10811 (1.078, 1.1394)  | <0.001  | 2.502 (2.051, 3.052)      | <0.001  |
| Nonrush hours          | 1.091 (1.031, 1.154)     | 0.003   | Ref                      |         | 2.912 (2.384, 3.556)      | <0.001  |
| Evening                | Ref                      |         | 0.992 (0.953, 1.032)     | 0.686   | 2.014 (1.64665, 2.46547)  | <0.001  |

Table 4. Multivariate logistic regression results (continued)

| Variable                           | Overtaking crashes               |         | Rear-end crashes                   |         | Door crashes                         |         |
|------------------------------------|----------------------------------|---------|------------------------------------|---------|--------------------------------------|---------|
|                                    | AOR (95% CI)                     | p value | AOR (95% CI)                       | p value | AOR (95% CI)                         | p value |
| <b>Crash day</b>                   |                                  |         |                                    |         |                                      |         |
| Weekend                            | 1.031 (0.991, 1.072)             | 0.132   | Ref                                |         | Ref                                  |         |
| Weekday                            | Ref                              |         | 1.090 (1.0659, 1.122)              | <0.001  | 1.246 <u>25</u> (1.162, 1.33634)     | <0.001  |
| <b>Cyclist's age (years)</b>       |                                  |         |                                    |         |                                      |         |
| ≤18                                | 1.292 (1.242, 1.345)             |         | Ref                                |         | Ref                                  |         |
| 19-40                              | 1.509 <u>51</u> (1.444, 1.578)   | <0.001  | 1.839 <u>84</u> (1.7889, 1.891)    | <0.001  | 5.943 (5.489, 6.43544)               | <0.001  |
| 41-64                              | 1.785 <u>70</u> (1.64965, 1.931) | <0.001  | 1.731 (1.6768, 1.789)              | <0.001  | 6.129 <u>13</u> (5.621, 6.684)       | <0.001  |
| ≥65                                |                                  |         | 1.671 (1.5687, 1.780)              | <0.001  | 5.9889 (5.21722, 6.874)              | <0.001  |
| <b>Cyclist's sex</b>               |                                  |         |                                    |         |                                      |         |
| Male                               | Ref                              |         | 1.172 (1.13714, 1.2081)            | <0.001  | Ref                                  |         |
| Female                             | 1.106 <u>11</u> (1.062, 1.153)   | <0.001  | Ref                                |         | 1.675 <u>68</u> (1.582, 1.774)       | <0.001  |
| <b>Crash partner</b>               |                                  |         |                                    |         |                                      |         |
| Taxi/Private hire car              | Ref                              |         | 1.286 <u>29</u> (1.1869, 1.394)    | <0.001  | 2.695 <u>70</u> (2.310, 3.145)       | <0.001  |
| Car                                | 1.571 (1.35936, 1.81682)         | <0.001  | Ref                                |         | 2.089 (1.9081, 2.28629)              | <0.001  |
| Bus/Heavy goods vehicle            | 2.867 (2.473, 3.323)             | <0.001  | 1.099 <u>10</u> (1.061, 1.13914)   | <0.001  | Ref                                  |         |
| <b>Crash partner's age (years)</b> |                                  |         |                                    |         |                                      |         |
| ≤18                                | 1.1097 (0.963, 1.24925)          | 0.162   | 1.225 <u>23</u> (1.18819, 1.263)   | <0.001  | 1.507 <u>51</u> (1.313311, 1.731731) | <0.001  |
| 19-40                              | Ref                              |         | 1.038 <u>04</u> (1.00801, 1.06997) | 0.013   | 1.855 <u>86</u> (1.62563, 2.11712)   | <0.001  |
| 41-64                              | 0.950 (0.90991, 0.994)           | 0.025   | Ref                                |         | Ref                                  |         |
| ≥65                                | 2.013 (1.93794, 2.092)           | <0.001  | 1.241 (1.13714, 1.35536)           | <0.001  | 1.801 (1.574, 2.060)                 | <0.001  |
| <b>Crash partner's sex</b>         |                                  |         |                                    |         |                                      |         |
| Male                               | 1.353 (1.292, 1.4162)            | <0.001  | 1.150 (1.11712, 1.18519)           | <0.001  | 1.373 (1.29630, 1.45546)             | <0.001  |
| Female                             | Ref                              |         | Ref                                |         | Ref                                  |         |

412

| Variable               | Overtaking crashes |         | Rear-end crashes  |         | Door crashes      |         |
|------------------------|--------------------|---------|-------------------|---------|-------------------|---------|
|                        | AOR (95% CI)       | p value | AOR (95% CI)      | p value | AOR (95% CI)      | p value |
| <b>Light condition</b> |                    |         |                   |         |                   |         |
| Daylight               | Ref                |         | Ref               |         | Ref               |         |
| Darkness-lit           | 0.81 (0.80, 0.84)  | <0.001  | 1.04 (1.00, 1.09) | 0.041   | 1.23 (1.20, 1.24) | <0.001  |
| Darkness-unlit         | 0.92 (0.90, 0.93)  | 0.001   | 1.49 (1.40, 1.57) | <0.001  | 0.87 (0.86, 1.02) | 0.136   |
| <b>Speed limit</b>     |                    |         |                   |         |                   |         |
| Rural (≥40 mph)        | Ref                |         | Ref               |         | Ref               |         |
| Urban (20-30 mph)      | 0.45 (0.43, 0.47)  | <0.001  | 0.76 (0.74, 0.79) | <0.001  | 16.2 (13.5, 19.4) | <0.001  |
| <b>Crash time</b>      |                    |         |                   |         |                   |         |
| Midnight               | 1.07 (0.98, 1.17)  | 0.119   | 1.28 (1.21, 1.40) | <0.001  | 0.50 (0.46, 0.53) | <0.001  |

Formatted Table

|                                    |                          |                  |                          |                  |                          |                  |
|------------------------------------|--------------------------|------------------|--------------------------|------------------|--------------------------|------------------|
| Rush hours                         | <u>1.06 (1.00, 1.12)</u> | <u>0.043</u>     | <u>1.12 (1.09, 1.15)</u> | <u>&lt;0.001</u> | <u>1.49 (1.45, 1.62)</u> | <u>&lt;0.001</u> |
| Nonrush hours                      | <u>1.09 (1.03, 1.15)</u> | <u>0.003</u>     | <u>1.01 (0.96, 1.10)</u> | <u>0.639</u>     | <u>1.90 (1.81, 1.93)</u> | <u>&lt;0.001</u> |
| Evening                            | Ref                      |                  | Ref                      |                  | Ref                      |                  |
| <b>Crash day</b>                   |                          |                  |                          |                  |                          |                  |
| Weekend                            | Ref                      |                  | Ref                      |                  | Ref                      |                  |
| Weekday                            | <u>0.97 (0.96, 1.01)</u> | <u>0.133</u>     | <u>1.09 (1.06, 1.12)</u> | <u>&lt;0.001</u> | <u>1.25 (1.16, 1.34)</u> | <u>&lt;0.001</u> |
| <b>Cyclist's age (years)</b>       |                          |                  |                          |                  |                          |                  |
| ≤18                                | Ref                      |                  | Ref                      |                  | Ref                      |                  |
| 19–40                              | <u>1.29 (1.24, 1.35)</u> | <u>&lt;0.001</u> | <u>1.84 (1.79, 1.89)</u> | <u>&lt;0.001</u> | <u>5.94 (5.49, 6.44)</u> | <u>&lt;0.001</u> |
| 41–64                              | <u>1.51 (1.44, 1.58)</u> | <u>&lt;0.001</u> | <u>1.73 (1.68, 1.79)</u> | <u>&lt;0.001</u> | <u>6.13 (5.62, 6.68)</u> | <u>&lt;0.001</u> |
| ≥65                                | <u>1.79 (1.65, 1.93)</u> | <u>&lt;0.001</u> | <u>1.67 (1.57, 1.78)</u> | <u>&lt;0.001</u> | <u>5.99 (5.22, 6.87)</u> | <u>&lt;0.001</u> |
| <b>Cyclist's sex</b>               |                          |                  |                          |                  |                          |                  |
| Male                               | Ref                      |                  | Ref                      |                  | Ref                      |                  |
| Female                             | <u>1.11 (1.06, 1.15)</u> | <u>&lt;0.001</u> | <u>0.85 (0.83, 0.90)</u> | <u>&lt;0.001</u> | <u>1.68 (1.58, 1.77)</u> | <u>&lt;0.001</u> |
| <b>Crash partner</b>               |                          |                  |                          |                  |                          |                  |
| Taxi/Private hire car              |                          |                  |                          |                  |                          |                  |
| Car                                | <u>0.64 (0.61, 0.69)</u> | <u>&lt;0.001</u> | <u>1.29 (1.19, 1.39)</u> | <u>&lt;0.001</u> | <u>1.61 (1.59, 1.69)</u> | <u>&lt;0.001</u> |
| Bus/Heavy goods vehicle/HGV        | Ref                      |                  | Ref                      |                  | Ref                      |                  |
| Car                                | <u>1.30 (1.27, 1.33)</u> | <u>&lt;0.001</u> | <u>1.10 (1.06, 1.14)</u> | <u>&lt;0.001</u> | <u>0.48 (0.45, 0.49)</u> | <u>&lt;0.001</u> |
| <b>Crash partner's age (years)</b> |                          |                  |                          |                  |                          |                  |
| ≤18                                | <u>1.10 (0.96, 1.25)</u> | <u>0.162</u>     | <u>1.19 (1.17, 1.24)</u> | <u>&lt;0.001</u> | <u>0.65 (0.63, 0.68)</u> | <u>&lt;0.001</u> |
| 19–40                              | Ref                      |                  | Ref                      |                  | Ref                      |                  |
| 41–64                              | <u>0.95 (0.91, 0.99)</u> | <u>0.025</u>     | <u>0.96 (0.95, 0.98)</u> | <u>0.026</u>     | <u>0.95 (0.93, 0.98)</u> | <u>&lt;0.001</u> |
| ≥65                                | <u>2.01 (1.94, 2.09)</u> | <u>&lt;0.001</u> | <u>1.20 (1.18, 1.31)</u> | <u>&lt;0.001</u> | <u>0.54 (0.52, 0.57)</u> | <u>&lt;0.001</u> |
| <b>Crash partner's sex</b>         |                          |                  |                          |                  |                          |                  |
| Male                               | <u>1.35 (1.29, 1.42)</u> | <u>&lt;0.001</u> | <u>1.15 (1.12, 1.19)</u> | <u>&lt;0.001</u> | <u>1.37 (1.30, 1.46)</u> | <u>&lt;0.001</u> |
| Female                             | Ref                      |                  | Ref                      |                  | Ref                      |                  |

413 [Table 5 presents the results of the multivariate logistic regression analysis. In overtaking](#)  
414 [crashes, the presence of HGVs as partners increases the likelihood by 1.3 times \(AOR = 1.30, 95%](#)  
415 [CI = 1.27–1.33; p < 0.001\). For cyclists aged 65 and older, the adjusted odds ratio \(AOR\) is 1.79](#)  
416 [\(95% CI = 1.65–1.93; p < 0.001\) compared to those aged 18 and younger. Factors associated with](#)  
417 [a decreased likelihood of crashes include daylight conditions \(AOR = 0.81, 95% CI = 0.80–0.84; p](#)  
418 [< 0.001\) and rural areas with speed limits of 40 mph or higher \(AOR = 0.45, 95% CI = 0.43–0.47;](#)  
419 [p < 0.001\).](#)

420 [For rear-end crashes, significant risk factors included darkness and unlit conditions \(AOR =](#)  
421 [1.49, 95% confidence interval \[CI\] = 1.40–1.57; p < 0.001\), crashes occurring on weekdays \(AOR](#)  
422 [= 1.09, 95% CI = 1.06–1.12; p < 0.001\), and an increased likelihood of rear-end crashes during](#)

423 [rush hours \(AOR = 1.12, 95% CI = 1.09–1.15; p < 0.001\)](#). In contrast, the risk is lower in urban  
424 [areas \(AOR = 0.76, 95% CI = 0.74–0.79; p < 0.001\)](#) when rural areas are used as the reference.

425 [Door crashes are significantly more prevalent in urban areas with speed limits of 20 to 30](#)  
426 [mph—approximately 16 times higher \(AOR = 16.2, 95% CI = 13.5–19.4; p < 0.001\)](#). Additionally,  
427 [interactions with taxis or private hire cars as crash partners further increase the likelihood of](#)  
428 [these crashes \(AOR = 1.61, 95% CI = 1.59–1.69; p < 0.001\)](#). Other important risk factors include  
429 [conditions of darkness with illumination \(AOR = 1.23, 95% CI = 1.20–1.24; p < 0.001\)](#) and crashes  
430 [occurring on weekdays \(AOR = 1.25, 95% CI = 1.16–1.34; p < 0.001\)](#). Furthermore, male crash  
431 [partners were associated with increased odds of door crashes \(AOR = 1.37, 95% CI = 1.30–1.47;](#)  
432 [p < 0.001\)](#).

433 ▲  
434 Figure 2 presents a forest plot demonstrating the joint effects of several variables on the  
435 three crash types when other variables were controlled for. The results identified several key risk  
436 factors for both overtaking and rear-end crashes. The risk of overtaking crashes showed a  
437 significant increase of 193% in rural areas when elderly drivers were involved (AOR = 2.93, 95%  
438 CI = 2.79–3.08), and similarly when heavy goods vehicles (HGVs) were the crash partner (AOR =  
439 2.62, 95% CI = 2.46–2.78). Elderly cyclists also faced a higher risk of overtaking crashes on  
440 weekends (AOR = 1.56, 95% CI = 1.34–1.81).

441 Regarding rear-end crashes, the risk increased notably with unlit darkness during  
442 midnight (AOR = 1.68, 95% CI = 1.48–1.90) and was significantly higher in rural areas (AOR = 2.15,  
443 95% CI = 2.01–2.31). Furthermore, bicycling at midnight in rural areas was associated with an  
444 increased risk of rear-end crashes (AOR = 1.68; 95% CI = 1.51–1.86). In urban settings, the risk of  
445 door crashes was higher for female cyclists (AOR = 2.29; 95% CI = 2.17–2.43) and for elderly

Formatted: English (United States)

446 cyclists (AOR = 2.06; 95% CI = 1.82–2.34). Finally, female cyclists exhibited a 112% higher  
 447 likelihood of door crashes when the crash partner was a taxi (AOR = 2.12; 95% CI = 1.68–2.69).

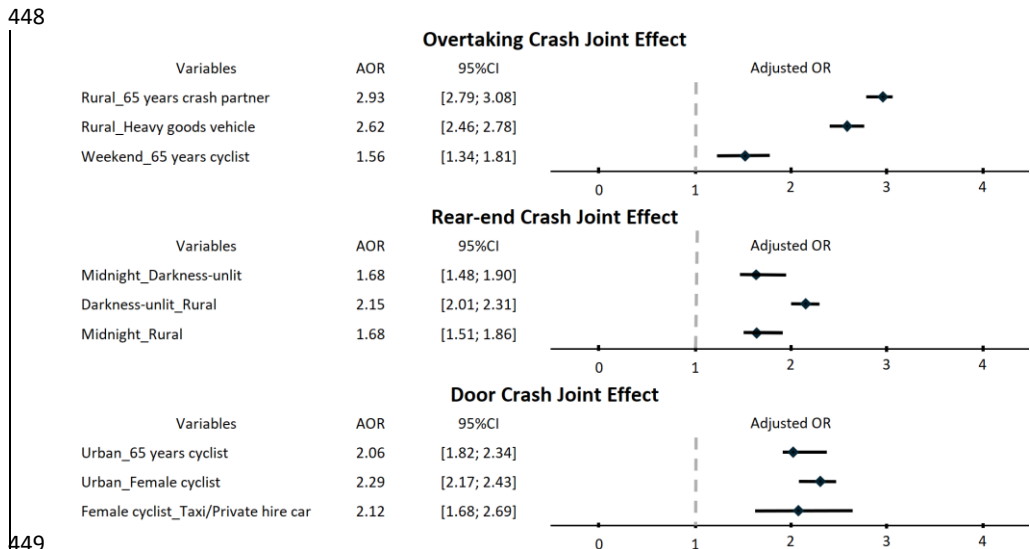

449 **Figure 3.** Joint effects of several variables on the three crash types.  
 450  
 451  
 452  
 453  
 454

455 **Discussion**

456 This study explored the relationships among individual and environmental factors in relation  
 457 to three common bicycle crash types (overtaking, rear-end, and door crashes) on roads in the  
 458 United Kingdom from 1991 to 2020. The findings revealed several significant factors. First, for  
 459 overtaking crashes, HGVs as crash partners, rural areas, and the involvement of elderly crash  
 460 partners emerged as key contributing factors. Second, unlit darkness, midnight hours, and rural  
 461 areas were the factors most closely associated with rear-end crashes. Third, urban areas and taxis  
 462 as crash partners significantly increased the likelihood of door crashes. Moreover, male crash

Formatted: Indent: First line: 2 ch

463 partners were found to be a consistent risk factor across all three crash types.

464 Our research findings identified specific risk factors for overtaking crashes, namely rural  
465 areas, HGVs as crash partners, and elderly crash partners. These findings align with previous  
466 research that identified elderly drivers (23), speeds exceeding 10 mph, and the presence of pick-  
467 up trucks as factors contributing to increased risk for overtaking crash. Specifically, HGVs possess  
468 several characteristics that amplify this danger. Their large blind spots make it difficult for drivers  
469 to see cyclists, increasing the likelihood of crashes during overtaking (24) [\[1\]](#). Additionally, HGVs  
470 are less manoeuvrable compared to passenger cars, which reduces their ability to avoid crashes  
471 if cyclists suddenly enter their path (25) [\[1\]](#). The speed and distance perception issues between  
472 HGVs and cyclists further complicate the judgment of safe overtaking gaps (26) [\[1\]](#). Furthermore,  
473 HGVs require longer stopping distances due to their size and weight, which can lead to severe  
474 consequences if a sudden need to brake arises. A behavioural study suggested that compared  
475 with cars, HGVs tended to maintain a narrower clearance zone when overtaking bicycles (27).  
476 Regarding the association with buses or HGVs, Pai et al. suggested that time pressures on HGV  
477 drivers for timely loading and unloading might lead to more reckless driving (18). Specifically, our  
478 results align with the observations made by Pai et al., who also mentioned higher crash rates  
479 involving buses or HGVs, supporting the idea that these time pressures contribute to increased  
480 crash risks. Our findings underscore the necessity of implementing measures such as 'Share the  
481 Road' warning signs (28), particularly in rural settings, where HGVs are likely to execute  
482 overtaking manoeuvres at high speed. Such measures could prompt motor vehicles to maintain  
483 safer distances from the edges of travel lanes, especially in areas with a notable presence of both  
484 HGVs and bicycles.

485 We also identified elderly drivers as a factor contributing to overtaking crashes—a finding  
486 consistent with relevant research (23). We found that as individuals age, their risk of being  
487 involved in road accidents increases, primarily due to declines in cognitive capabilities. Our study  
488 corroborates these findings by showing that older cyclists are more susceptible to accidents  
489 during overtaking manoeuvres, which can be attributed to diminished reaction times and  
490 impaired decision-making abilities (29), their health (30), and their driving performance (31).  
491 Notably, crashes involving elderly individuals often occur in scenarios with challenging conditions,  
492 including at intersections without traffic control measures, on high-speed roads, during adverse  
493 weather conditions, in poorly lit areas, and in head-on accidents (32-34). The heightened level of  
494 risk under such conditions may be attributed to cognitive and perceptual decline in older drivers,  
495 which could affect their capacity to execute actions such as overtaking manoeuvres safely.  
496 Accordingly, developing specialised cognitive training programmes as interventions to enhance  
497 road safety for elderly drivers is evidently necessary (35). Based on our study's findings, we  
498 recommend the development of specialised interventions to improve road safety for elderly  
499 cyclists. Our analysis reveals that older cyclists are at a higher risk of being involved in overtaking  
500 crashes, with this increased risk being strongly linked to declines in cognitive capabilities  
501 associated with aging. To address this issue, we advocate for the implementation of targeted  
502 cognitive training programs specifically designed for elderly cyclists. These programs should focus  
503 on enhancing critical skills such as reaction time, situational awareness, and decision-making  
504 abilities, which are crucial for reducing crash risk and improving overall road safety.

505 In the present study, several factors were found to increase the risk of rear-end crashes on  
506 road segments, including darkness with unlit surroundings, midnight hours, and rural settings



507 (speed limit > 40 mph). Although few studies have specifically addressed rear-end crashes  
508 involving bicycles on road segments, available data suggest that the low conspicuity of bicycles,  
509 especially at night, is a recurrent factor in rear-end crashes(18) . Moreover, a lack of adequate  
510 street lighting, which is common in rural settings, predisposes cyclists to rear-end crashes-. Our  
511 joint-effects analysis further indicated that the detrimental effect of unlit darkness is more  
512 pronounced in rural areas and during midnight hours. Potential intervention strategies to  
513 mitigate rear-end crashes include enhancing illumination and executing speed control  
514 management on rural road segments with heavy bicycle traffic.

515       Next, our analysis successfully identified associations of urban areas and taxis and private  
516 hire cars as crash partners with door crashes on road segments. Although research specifically  
517 focusing on door crashes on road segments is limited, similar findings were documented by Pai,  
518 indicating that urban roadways and taxis contributed to door crashes (18). However, determining  
519 the factors influencing this trend poses a challenge. One possible explanation could be the  
520 increased presence of taxis or private hire cars in such areas, where passengers often disembark.  
521 Additionally, our analysis further revealed an elevated risk of door crashes involving crashes with  
522 taxis in urban areas. To reduce door crashes on road segments, educating taxi drivers, as well as  
523 passengers, about the importance of vigilance when opening doors near traffic is essential (18).  
524 In addition, cyclists should be advised to maintain at least a door's width distance from all parked  
525 cars to improve the sight triangles of drivers and increase the visibility of cyclists (36).  
526 Implementing a two-stage door opening mechanism for vehicles, which would enable drivers to  
527 verify the presence of bicycles to the rear, could also be beneficial (37).

528       The strengths of this study include the use of STATS19 datasets spanning from 1991 to 2020,

529 which provides a robust statistical foundation and a broad perspective on trends in bicycle  
530 crashes. By focusing specifically on three crash types on road segments—overtaking, rear-end,  
531 and door crashes—the study provides a comprehensive and focused analysis, which can yield  
532 more actionable insights and more effective recommendations. The UK-based dataset ensures  
533 that the findings are particularly relevant for local policy and safety interventions. Additionally,  
534 the application of statistical techniques and the consideration of various factors, such as crash  
535 partner and time of day, enhance the validity and depth of the analysis.

536 This study had several limitations that warrant acknowledgement. First, the substantial  
537 underreporting of nonfatal casualties to the police, particularly casualties involving cyclists not  
538 obligated to report accidents, is a critical factor to consider. Such underreporting, as highlighted  
539 by the U.K. Government’s Department for Transport (11), likely results in the incomplete  
540 representation of nonfatal and ‘slight’ casualties in road casualty data. Second, the STATS19 data  
541 utilised in this study lack critical variables, including precrash speeds, specific geometric  
542 characteristics of roadways, data regarding alcohol and illicit substance use, and cyclist speed at  
543 the time of an accident. Moreover, critical exposure data—such as those related to traffic flow,  
544 rider or driver experience, and other elements of risk exposure—are absent, and the absence of  
545 such details limits our ability to fully account for potential variations resulting from unobserved  
546 factors in the analyses. Finally, this study did not explore annual trends in each type of bicycle  
547 crash over the 30-year study period; investigating such trends could provide insights regarding  
548 changing behaviours among cyclists and motor vehicle drivers as well as the effects of legislative  
549 changes for road speed limits.

550 One inherent problem with police-reported crash data is the variables not readily available,

551 hereby causing unobserved heterogeneity across the observations. To overcome such a  
552 limitation, we estimated separate regression models, as suggested by Kim et al.(38), for the three  
553 crash types; such an approach provides greater explanatory power compared to single overall  
554 models. Further, we conducted joint-effect analyses of several variables of interest that capture  
555 heterogeneity. In our previous studies, we adopted the above-mentioned approaches to  
556 overcome the inherent problem with a success (39, 40).

557 Future research directions could involve integrating GPS (Global Positioning System) data  
558 and weather conditions to analyse both injury frequency and fatalities of bicycle crashes on road  
559 segments. Additionally, exploring the potential of autonomous vehicles for detecting  
560 approaching bicycles for door-crashes and implementing AI-controlled lighting systems in rural  
561 areas for cyclist detection could be promising areas for further study.

562

### 563 **Recommendations**

564 For overtaking crashes, we recommend implementing 'Share the Road' warning signs,  
565 especially in rural areas, and developing specialized cognitive training programs for elderly  
566 drivers. Regarding rear-end crashes, our suggestions include improving illumination during night  
567 time and implementing speed control measures on rural road segments. For door crashes  
568 involving parked cars, we propose enhancing driver sight triangles and increasing cyclist visibility.  
569 Moreover, implementing a two-stage door opening mechanism and an automatic detection  
570 device in vehicles to alert drivers of bicycles approaching from behind could potentially be  
571 beneficial.

572

573 **Conclusions**

574 This study identified several significant risk factors for the three predominate types of crashes  
575 involving cyclists on road segments: HGVs as crash partners, elderly crash partners, and rural  
576 areas for overtaking crashes; unlit darkness, midnight hours, and rural areas for rear-end crashes;  
577 and urban areas and taxis as crash partners for door crashes. These risk factors remained  
578 unchanged since our previous study conducted in 2011 ~~(15)~~(18). The present research enhances  
579 the field of bicycle safety research by concluding that the detrimental effects of certain variables  
580 become more pronounced under certain conditions. For example, first, cyclists in rural settings  
581 exhibited an elevated risk of overtaking crashes involving HGVs. Second, the rear-end crash risk  
582 increases in the combined presence of unlit darkness, midnight hours, and rural areas. Finally, in  
583 urban settings, the likelihood of door crashes increases when a taxi is the crash partner.

584

585 **Abbreviations**

586 WHO: World Health Organization; HGVs: heavy goods vehicles; AOR: adjusted odds ratio; CI:  
587 confidence interval.

588

589 **Acknowledgments**

590 This manuscript was edited by Wallace Academic Editing.

591

592 **Author contributions**

593 **Literature review:** Chun-Chieh Chao.

594 **Methodology:** Chun-Chieh Chao, Chih-Wei Pai.

595 **Data merging and analysis:** Akhmad Fajri Widodo, Wafaa Saleh, Bayu Satria Wiratama.

596 **Writing - original draft:** Chun-Chieh Chao.

597 **Writing – review and editing:** Hui-An Lin, Chenyi Chen, Hon-Ping Ma, Akhmad Fajri Widodo

598 [Cheng-Wei Chan](#).

599 **Validation:** Chun-Chieh Chao, Hui-An Lin, Chenyi Chen, Hon-Ping Ma, Shih Yu Ko.

600 **Supervision:** Li Wei, Yen-Nung Lin, Shou-Chien Hsu, Chih-Wei Pai.

601 ~~**Funding:** Cheng-Wei Chan, Chih-Wei Pai.~~

602

603

#### 604 **Funding**

605 ~~This study received financial support from the Ministry of Science and Technology, Taiwan (MOST~~

606 ~~110-2410-H-038-016-MY2 and MOST 109-2314-B-038-066-); New Taipei City Hospital~~

607 ~~(NTPC113-002), and the National Science and Technology Council, Taiwan (NSTC 112-2410-H-~~

608 ~~038-016-MY2). The funders played no role in the design of the study, data collection and analysis,~~

609 ~~interpretation of data, or preparation of the manuscript.~~

610

#### 611 **Availability of data and materials**

612 This study utilised the British STATS19 database, which contains data on all road traffic accidents

613 in the United Kingdom. The data that support the findings of this study are openly available at

614 <https://figshare.com/ndownloader/files/48173452>.

615

616 **Declarations**

617 **Ethical approval and consent to participate**

618 This study was conducted in accordance with the Declaration of Helsinki and approved by the  
619 Joint Institutional Review Board of Taipei Medical University (N202011030).

620

621 **Consent for publication**

622 This study was approved by the Joint Institutional Review Board of Taipei Medical  
623 University (N202011030). The Joint Institutional Review Board of Taipei Medical University has  
624 waived the requirement of informed consent. All methods were performed in accordance with  
625 the relevant guidelines and regulations of the Declaration of Helsinki.

626

627 **Competing interests**

628 The authors declare that they have no competing interests in relation to this work.

629

630 **Author information**

631 <sup>1</sup>Graduate Institute of Injury Prevention and Control, College of Public Health, Taipei Medical  
632 University, Taipei City, Taiwan. <sup>2</sup>Department of Emergency Medicine, Taipei Medical University  
633 Hospital, Taipei City, Taiwan. <sup>3</sup>Department of Emergency Medicine, School of Medicine, College  
634 of Medicine, Taipei Medical University, Taipei City, Taiwan. <sup>4</sup>Department of Emergency Medicine,  
635 New Taipei City Hospital, New Taipei City, Taiwan. <sup>5</sup>College of Medicine, Chang Gung University,  
636 Taoyuan City, Taiwan. <sup>6</sup>Department of Emergency Medicine, Chang Gung Memorial Hospital,  
637 Linkou branch, Taoyuan, Taiwan. <sup>7</sup> Department of Emergency Medicine, Taipei Medical

638 University-Shuang Ho Hospital, New Taipei City, Taiwan. <sup>8</sup>Taipei Neuroscience Institute, Taipei  
639 Medical University, Taipei City, Taiwan. <sup>9</sup>Division of Neurosurgery, Department of Surgery, Wan  
640 Fang Hospital, Taipei Medical University, Taipei City, Taiwan. <sup>10</sup>Department of Physical Medicine  
641 and Rehabilitation, Wan Fang Hospital, Taipei Medical University, Taipei City, Taiwan. <sup>11</sup>Transport  
642 Research Institute, Edinburgh Napier University, Edinburgh, Scotland. <sup>12</sup>Department of  
643 Epidemiology, Biostatistics, and Population Health, Faculty of Medicine, Public Health and  
644 Nursing, Universitas Gadjah Mada, Yogyakarta City, Indonesia, <sup>13</sup>Department of Occupational  
645 Medicine, Chang Gung Memorial Hospital, Linkou branch, Taoyuan, Taiwan.

646 **References:**

- 647 1. World Health Organization. Regional Office for E. Walking and cycling: latest evidence to  
648 support policy-making and practice. Copenhagen: World Health Organization. Regional Office for  
649 Europe; 2022 2022.
- 650 2. Kjeldgård L, Ohlin M, Elrud R, Stigson H, Alexanderson K, Friberg E. Bicycle crashes and  
651 sickness absence - a population-based Swedish register study of all individuals of working ages.  
652 BMC Public Health. 2019;19(1):943.
- 653 3. Venkatraman V, Richard CM, Magee K, Johnson K. Countermeasures That Work: A  
654 Highway Safety Countermeasure Guide for State Highway Safety Offices, 10th Edition, 2020.  
655 2021(DOT HS 813 097).
- 656 4. Allen-Munley C, Daniel J, Dhar S. Logistic Model for Rating Urban Bicycle Route Safety.  
657 Transportation Research Record. 2004;1878(1):107-15.
- 658 5. Kaplan JA. Characteristics of the Regular Adult Bicycle User. Final Report1975.
- 659 6. Rivara FP, Thompson DC, Thompson RS. Epidemiology of bicycle injuries and risk factors  
660 for serious injury. Injury Prevention. 1997;3(2):110-4.
- 661 7. Wanvik PO. Effects of road lighting: an analysis based on Dutch accident statistics 1987-  
662 2006. Accident Analysis & Prevention 2009;41(1):123-8.
- 663 8. Elvik R, Sundfør HB. How can cyclist injuries be included in health impact economic  
664 assessments? Journal of Transport & Health. 2017;6:29-39.
- 665 9. Aertsens J, de Geus B, Vandenbulcke G, Degraeuwe B, Broekx S, De Nocker L, et al.  
666 Commuting by bike in Belgium, the costs of minor accidents. Accident Analysis & Prevention.  
667 2010;42(6):2149-57.
- 668 10. Scholten AC, Polinder S, Panneman MJ, Van Beeck EF, Haagsma JA. Incidence and costs of  
669 bicycle-related traumatic brain injuries in the Netherlands. Accident Analysis & Prevention.  
670 2015;81:51-60.
- 671 11. Traffic Safety Facts - Bicyclists and Other Cyclists.  
672 <https://crashstats.nhtsa.dot.gov/Api/Public/ViewPublication/813322>: National Highway Traffic  
673 Safety Administration; 2020.
- 674 12. Bil M, Bilova M, Muller I. Critical factors in fatal collisions of adult cyclists with automobiles.  
675 Accident Analysis & Prevention 2010;42(6):1632-6.
- 676 13. Moore DN, Schneider WHt, Savolainen PT, Farzaneh M. Mixed logit analysis of bicyclist  
677 injury severity resulting from motor vehicle crashes at intersection and non-intersection locations.  
678 Accident Analysis & Prevention. 2011;43(3):621-30.
- 679 14. Wachtel A, Lewiston D. Risk factors for bicycle-motor vehicle collisions at intersections.  
680 Institute of Transportation Engineers. 1994;64(9):30-5.
- 681 15. Ugan J, Abdel-Aty M, Cai Q, Mahmoud N, Al-Omari Me. Effect of Various Speed  
682 Management Strategies on Bicycle Crashes for Urban Roads in Central Florida. Transportation  
683 Research Record: Journal of the Transportation Research Board. 2021;2676:036119812110366.
- 684 16. Meuleners LB, Fraser M, Johnson M, Stevenson M, Rose G, Oxley J. Characteristics of the  
685 road infrastructure and injurious cyclist crashes resulting in a hospitalisation. Accident Analysis &  
686 Prevention. 2020;136:105407.
- 687 17. Robartes E, Chen TD. The effect of crash characteristics on cyclist injuries: An analysis of  
688 Virginia automobile-bicycle crash data. Accident Analysis & Prevention. 2017;104:165-73.



- 689 18. Pai C-W. Overtaking, rear-end, and door crashes involving bicycles: An empirical  
690 investigation. *Accident Analysis & Prevention*. 2011;43(3):1228-35.
- 691 19. Debnath AK, Haworth N, Schramm A, Heesch KC, Somoray K. Factors influencing  
692 noncompliance with bicycle passing distance laws. *Accident Analysis & Prevention*.  
693 2018;115:137-42.
- 694 20. Vandenberghe JP, von Elm E, Altman DG, Gøtzsche PC, Mulrow CD, Pocock SJ, et al.  
695 Strengthening the Reporting of Observational Studies in Epidemiology (STROBE): explanation and  
696 elaboration. *PLoS Medicine*. 2007;4(10):1628-55.
- 697 21. Watson A, Watson B, Vallmuur K. Estimating under-reporting of road crash injuries to  
698 police using multiple linked data collections. *Accident Analysis & Prevention*. 2015;83:18-25.
- 699 22. Maldonado G, Greenland S. Simulation study of confounder-selection strategies.  
700 *American Journal of Epidemiology*. 1993;138(11):923-36.
- 701 23. Liu J, Jones S, Adanu EK, Li X. Behavioral pathways in bicycle-motor vehicle crashes: From  
702 contributing factors, pre-crash actions, to injury severities. *The Journal of Safety Research*.  
703 2021;77:229-40.
- 704 24. Marshall R, Summerskill S, editors. An objective methodology for blind spot analysis of  
705 HGVs using a DHM approach. DS 87-8 Proceedings of the 21st International Conference on  
706 Engineering Design (ICED 17) Vol 8: Human Behaviour in Design, Vancouver, Canada, 21-2508  
707 2017; 2017.
- 708 25. Frings D, Rose A, Ridley AM. Bicyclist fatalities involving heavy goods vehicles: Gender  
709 differences in risk perception, behavioral choices, and training. *Traffic Injury  
710 preventionPrevention*. 2012;13(5):493-8.
- 711 26. Chew EL-W, Stephens A. Human Factors That Impact HGV Drivers From Being Aware of  
712 VRUs Through Direct and Indirect Vision Mechanisms.
- 713 27. Walker I. Signals are informative but slow down responses when drivers meet bicyclists  
714 at road junctions. *Accident Analysis & Prevention* 2005;37(6):1074-85.
- 715 28. Kay JJ, Savolainen PT, Gates TJ, Datta TK. Driver behavior during bicycle passing  
716 maneuvers in response to a Share the Road sign treatment. *Accident Analysis & Prevention*.  
717 2014;70:92-9.
- 718 29. Anstey KJ, Horswill MS, Wood JM, Hatherly C. The role of cognitive and visual abilities as  
719 predictors in the Multifactorial Model of Driving Safety. *Accident Analysis & Prevention*  
720 2012;45:766-74.
- 721 30. Kandasamy D, Betz ME, DiGiuseppi C, Mielenz TJ, Eby DW, Molnar LJ, et al. Self-reported  
722 health conditions and related driving reduction in older drivers. *Occupational Therapy in Health  
723 Care*. 2018;32(4):363-79.
- 724 31. Laosee O, Rattanapan C, Somrngthong R. Physical and cognitive functions affecting road  
725 traffic injuries among senior drivers. *Archives of Gerontology and Geriatrics* 2018;78:160-4.
- 726 32. Cicchino JB, Wells JK, McCartt AT. Survey about pedestrian safety and attitudes toward  
727 automated traffic enforcement in Washington, D.C. *Traffic Injury Prevention*. 2014;15(4):414-23.
- 728 33. Kostyniuk LP, Molnar LJ. Self-regulatory driving practices among older adults: health, age  
729 and sex effects. *Accident Analysis & Prevention*. 2008;40(4):1576-80.
- 730 34. Zhang J, Lindsay J, Clarke K, Robbins G, Mao Y. Factors affecting the severity of motor  
731 vehicle traffic crashes involving elderly drivers in Ontario. *Accident Analysis & Prevention*  
732 2000;32(1):117-25.

- 733 35. Edwards JD, Ross LA, Wadley VG, Clay OJ, Crowe M, Roenker DL, et al. The useful field of  
734 view test: normative data for older adults. Archives of Clinical Neuropsychology. 2006;21(4):275-  
735 86.
- 736 36. W.~Hunter W, Stewart JR. An Evaluation of Bike Lanes Adjacent to Motor Vehicle Parking.  
737 1999.
- 738 37. Huang C-Y. Observations of Drivers' Behavior when Opening Car Doors. Procedia  
739 Manufacturing. 2015;3:2753-60.
- 740 38. Kim D-G, Washington S, Oh J. Modeling crash types: New insights into the effects of  
741 covariates on crashes at rural intersections. Journal of Transportation Engineering.  
742 2006;132(4):282-92.
- 743 39. Pai C-W, Saleh W. Modelling motorcyclist injury severity by various crash types at T-  
744 junctions in the UK. Safety Science. 2008;46(8):1234-47.
- 745 40. Pai C-W, Jou R-C. Cyclists' red-light running behaviours: An examination of risk-taking,  
746 opportunistic, and law-obeying behaviours. Accident Analysis & Prevention. 2014;62:191-8.

747 [b Marshall, Russell, and Stephen Summerskill. "An objective methodology for blind spot  
748 analysis of HGVs using a DHM approach." DS 87-8 Proceedings of the 21st  
749 International Conference on Engineering Design \(ICED 17\) Vol 8: Human Behaviour in  
750 Design, Vancouver, Canada, 24-25.08. 2017. 2017.](#)

751 [Frings, Daniel, Andy Rose, and Anne M. Ridley. "Bicyclist fatalities involving heavy  
752 goods vehicles: Gender differences in risk perception, behavioral choices, and  
753 training." Traffic injury prevention 13.5 \(2012\): 493-498.](#)

754 [Chew, Esther Li Wen, and Amanda Stephens. "Human Factors That Impact HGV  
755 Drivers From Being Aware of VRUs Through Direct and Indirect Vision Mechanisms."](#)

756 [\\_\\_\\_\\_\\_](#)

757

Formatted: List Paragraph, Space Before: 12 pt, After: 12 pt, Outline numbered + Level: 1 + Numbering Style: a, b, c, ... + Start at: 1 + Alignment: Left + Aligned at: 0.25" + Indent at: 0.5"

Formatted: List Paragraph, Indent: Left: 0.5", Space Before: 12 pt, After: 12 pt

Dear Editors and Reviewers,

We greatly appreciate the valuable comments and suggestions raised by reviewers. Please very kindly see our responses below, as well as the revised manuscript. We would be glad if you could have our manuscript reviewed again.

Best regards,

Chih-Wei Pai (Prof)

Graduate Institute of Injury Prevention and Control College of Public Health

Taipei Medical University

Reviewer comments:

Reviewer 1: Regarding the statistical analysis, I would like to ask the authors to explain:  
1. the reason(s) for ignoring any probable interaction between independent variables in the multivariate logistic regression.

**Author's response:** We appreciate the reviewer's comment and question. By examining variables independently, we gain a clearer understanding of their individual impacts on the outcome (specifically, crash type in this study). This approach allows us to assess each variable's direct influence without the added complexity of interactions or modifications between variables. It provides insights into which variables independently affect the outcome, directly addressing our research questions. Initially, we used the chi-squared test to explore associations between a set of independent variables and the three crash types. To minimize type II errors in variable selection and ensure unbiased inferences, we included variables with a p-value less than 0.2 from the univariate analysis into the multivariate logistic regression models, a common practice in past studies of traffic injuries (e.g., a, b) and methodology (c). Subsequently, we examined interaction effects among several variables of interest, as depicted in Figure 2 of the manuscript. While acknowledging the potential for other interactions among variables, our study focused on assessing the joint effects of specific variables of interest. To take overtaking crashes as an example, these variables included rural areas, crash partners aged 65 years or older, heavy goods vehicles, weekends, and cyclists aged 65 years or older. Future research could delve into untangling the complexities of additional interaction effects among variables, as suggested by the reviewer.

References:

a: Chen, P-L, Pai, C-W. Evaluation of injuries sustained by motorcyclists in approach-turn crashes in Taiwan. *Accident Analysis and Prevention*, 2019, 124, 33-39.

b: Chien, D-K., Hwang, HF, Lin, MR. Injury severity measures for predicting return-to-work after a traumatic brain injury. *Accident Analysis and Prevention*, 2017, 98, 101-107.

c: Maldonado G, Greenland S. Simulation study of confounder-selection strategies. *Am J Epidemiol* 1993, 138, 11, 923-936.

2. Why did they consider different reference categories for the same individual variables among different outcomes in logistic regression modeling? This will make it difficult to interpret the comparison of the effect of an independent variable on different types of crashes. for example, in table 4, the ref category for Light condition is

Darkness-lit, Daylight and Darkness-unlit for Overtaking, Rear-end and Door crashes respectively.

**Author's response:** We appreciate the reviewer's comment and question. In our analysis, we chose various reference categories for variables based on the lowest Adjusted Odds Ratios (AORs) observed. This approach allowed us to highlight different risk factors associated with higher AORs for specific types of crashes. For example, urban roads with speed limits of 20-30 mph were identified as protective factors for overtaking and rear-end crashes. However, for door crashes, these urban roads appeared to pose a higher risk compared to rural roads, as indicated by their higher AOR. It is important to note that selecting a reference category does not change the estimation results of our models. Instead, assigning reference case with the lowest AOR helps readers identify risk factors with higher AORs among the three crash types.

3. I suggest authors provide identical indicators for figures both in the main text and in the figure's caption. Reading "Fig. 1" below a figure, one will look for the same word in the main text while it is recalled as "Figure 1".

**Author's response:** We appreciate this reviewer's comments, and we have revised the manuscript in the main text and figure's caption (please refer to lines 145 to 146; page 8 in the manuscript).

Reviewer 2:

1 General comments:

1.1 None of the authors was from the UK???

**Author's response:** We appreciate this reviewer's comments. One of our authors, Prof. Wafaa Saleh, is from Edinburgh Napier University, UK.

1.2 The authors should emphasize the significance of including these three types of crashes????

**Author's response:** We appreciate the reviewer's comments. We have incorporated the following statements into the introduction to underscore the significance of including the three crash types (please refer to lines 110 to 115; pages 5-6 in the manuscript):

“The study addresses a critical gap in current research, focusing on crashes specifically occurring on road segments. Existing literature offers limited insights into this specific type of crash, highlighting a crucial need for targeted investigation. These crashes have the potential for severe impact, involving complex dynamics that demand a nuanced understanding for effective mitigation strategies. By exploring these factors, our research aims to significantly enhance cyclist safety within this particular context.”

1.3 What novelty this study adds compared to the previous one in 2011???

**Author's response:**

We appreciate this reviewer's comment. One inherent problem with police-reported crash data is the variables not readily available, hereby causing unobserved heterogeneity across the observations. To overcome such a limitation, we estimated separate regression models, as suggested by Kim et al. (e.g., d), for the three crash types; such an approach provides greater explanatory power compared to single overall models. Further, we conducted joint-effect analyses of several variables of interest that capture heterogeneity. In our previous studies, we adopted the above-mentioned approaches to overcome the inherent problem with a success (e.g., e, f).

To clarify this, the following statements have been added to the Discussion section of the manuscript (please refer to lines 391 to 397; page 23 in the manuscript):

“One inherent problem with police-reported crash data is the variables not readily available, hereby causing unobserved heterogeneity across the observations. To overcome such a limitation, we estimated separate regression models, as

suggested by Kim et al. (e.g., d), for the three crash types; such an approach provides greater explanatory power compared to single overall models. Further, we conducted joint-effect analyses of several variables of interest that capture heterogeneity. In our previous studies, we adopted the above-mentioned approaches to overcome the inherent problem with a success (e.g., e, f).”

d: Kim, D., Washington, S., Oh, J., 2006. Modelling crash outcomes: new insights into the effects of covariates on crashes at rural intersections. *Journal of Transportation Engineering*. 132 (4), 282-292.

e: Pai CW, Jou RC, 2014. Cyclists’ red-light running behaviours: An examination of risk-taking, opportunistic, and law-obeying behaviours. *Accident Analysis and Prevention*. 62,191-198.

f: Pai CW, Saleh W., 2008. Modelling motorcyclist injury severity by various crash types at T-junctions in the UK. *Safety Science*. 13, 98-98.

1.4 The rationale for conducting the current study as well as the practical implications should be emphasized??

**Author’s response:** We appreciate this reviewer’s comments. First, regarding the rationale for conducting the current study, we have added the following statements (please kindly refer to lines 91-95 on page 5 of the manuscript):

“Bicycle crashes on road segments remain a substantial issue for public health concern. Existing research primarily emphasizes intersection-related crashes. This study aims to fill a critical gap by conducting a thorough examination of the risk factors associated with three distinct bicycle crash types: overtaking, rear-end, and door crashes that occur on road segments.”

Secondly, to highlight the practical implications, we have included the following statements in the Discussion section (please refer to lines 404-412 on pages 23-24 of the manuscript):

“Recommendations

For overtaking crashes, we recommend implementing 'Share the Road' warning signs, especially in rural areas, and developing specialized cognitive training programs for elderly drivers. Regarding rear-end crashes, our suggestions include improving illumination during night time and implementing speed control measures on rural road segments. For door crashes involving parked cars, we propose enhancing driver sight triangles and increasing cyclist visibility. Moreover, implementing a two-stage door opening mechanism and an automatic

detection device in vehicles to alert drivers of bicycles approaching from behind could potentially be beneficial.”

1.5 For the introduction section, burden in terms of mortality, morbidity, and DALYs should be mentioned as well the economic and health care costs should be mentioned (globally and UK)

**Author’s response:** We appreciate the reviewer’s comments. Our original literature review has included several past studies that have reported the accident/injury outcomes resulting from these three crash types. For example, road segments with elevated speed limits, male cyclists, and cyclists aged over 55 years contribute significantly to high injury severity crashes. Additionally, built-up areas increase the risk of door crashes involving cyclists and parked cars.

It is important to note that there is limited research specifically examining the impact of overtaking, rear-end, and door crashes on Disability-Adjusted Life Years DALYs, economic costs, and healthcare expenses. Notable exceptions include studies by Elvik and Sundfør (e.g., d), who examined the inclusion of cyclist injuries in health impact economic assessments. Aertsens et al. (e.g., h) and Scholten et al. (e.g., i) also provided comprehensive analyses of the total and average costs associated with bicycle injuries. Although the three crash types were not explicitly examined in the above-mentioned studies, we have followed this reviewer’s suggestion by incorporating these studies into the 'Introduction' section (please refer to lines 77-81; page 4 of the manuscript):

“Bicycle crashes can also impose a significant burden on healthcare expenses. Elvik and Sundfør (e.g., g) have discussed the economic implications and healthcare expenditures associated with bicycle accidents. For instance, in Belgium, the average cost of bicycle accidents per case is estimated at 841 euros (e.g., h). In the Netherlands, the total annual cost has been reported as €410.7 million (e.g., i).”

References:

- g: Elvik, R., & Sundfør, H. B. (2017). How can cyclist injuries be included in health impact economic assessments? *Journal of Transport & Health*, 6, 29-39.
- h: Aertsens, J., de Geus, B., Vandenbulcke, G., Degraeuwe, B., Broekx, S., De Nocker, L., ... & Panis, L. I. (2010). Commuting by bike in Belgium, the costs of minor accidents. *Accident Analysis & Prevention*, 42(6), 2149-2157.



i: Scholten, A. C., Polinder, S., Panneman, M. J., Van Beeck, E. F., & Haagsma, J. A. (2015). Incidence and costs of bicycle-related traumatic brain injuries in the Netherlands. *Accident Analysis & Prevention*, 81, 51-60.

1.6 The number of cyclists in UK or those using bicycles for their mobility??

**Author's response:** We appreciate the reviewer's comment. In our study, we analyzed national police-reported crash data involving cyclists. Unfortunately, exposure data, such as the number of cyclists and miles traveled, were not available in the STATS19 dataset. While such data may be available from the UK National Travel Survey, it often reflects outdated information and may not be fully representative of the entire population.

2. Specific comments:

2.1 Instead of data collection, data used for analysis is appropriate??

**Author's response:** We appreciate the reviewer's comment. The dataset, UK Stats19 covering all traffic accidents in the UK, should be appropriate, as numerous studies in the field of traffic injury and medicine have analysed such data (e.g., references j, k, l).

j: Haghpanahan, Houra, et al. "An evaluation of the effects of lowering blood alcohol concentration limits for drivers on the rates of road traffic accidents and alcohol consumption: a natural experiment." *The Lancet* 393.10169 (2019): 321-329.

k: Pai, C. W., Hwang, K. P., & Saleh, W. (2009). A mixed logit analysis of motorists' right-of-way violation in motorcycle accidents at priority T-junctions. *Accident Analysis & Prevention*, 41(3), 565-573.

l: Fountas, G., Fonzone, A., Gharavi, N., & Rye, T. (2020). The joint effect of weather and lighting conditions on injury severities of single-vehicle accidents. *Analytic methods in accident research*, 27, 100124.

2.2 Of the used crashes data, how many were fatal???

**Author's response:** We appreciate the reviewer's comment. As reported in the table below, as many as 0.8% of those in overtaking crashes sustained fatal injuries, which was the highest compared to those in the other two crash types.

|                    | Slight       | Serious      | Fatal     | Total |
|--------------------|--------------|--------------|-----------|-------|
| Overtaking crashes | 14240(77.6%) | 3,964(21.6%) | 147(0.8%) | 18350 |

|                  |              |             |          |       |
|------------------|--------------|-------------|----------|-------|
| Rear-end crashes | 39821(89.1%) | 4782(10.7%) | 89(0.2%) | 44692 |
| Door crashes     | 5561(87.4%)  | 770(12.1%)  | 32(0.5%) | 6363  |

2.3 For analysis of data, use the Odds ratios and 95% confidence intervals (univariate and bivariate)

**Author's response:** We appreciate this reviewer's comment. We analyzed the distribution of crash types across a set of independent variables. Chi-square tests were used to explore relationships between these variables and crash types. Variables with a significance level below 0.2 were identified to minimize type II errors and were considered significantly associated with the outcome variables ( $p < 0.05$ ). Subsequently, these variables were included in multiple logistic regression models. Stepwise logistic regression was then employed to estimate the odds of various variables after controlling for specific factors. This methodology has been widely used in past studies of traffic injuries (e.g., a, b) and methodology (e.g., c).

a: Chen, P-L, Pai, C-W. Evaluation of injuries sustained by motorcyclists in approach-turn crashes in Taiwan. *Accident Analysis and Prevention*, 2019, 124, 33-39;

b: Chien, D-K., Hwang, HF, Lin, MR. Injury severity measures for predicting return-to-work after a traumatic brain injury. *Accident Analysis and Prevention*, 2017, 98, 101-107;

c: Maldonado G, Greenland S. Simulation study of confounder-selection strategies. *Am J Epidemiol* 1993, 138, 11, 923-936).

2.4 Details about the multivariate logistic regression model should be mentioned???

Use the Odds ratios for interpreting and displaying the results in tables 1, 2, and 3???

**Author's response:** We appreciate the reviewer's comment. Firstly, if we understand this reviewer correctly, we have incorporated additional details (such as formulation and derivation) of the multivariate logistic regression model into the "Methods" section (please refer to lines 179-194 on pages 10-11 of the manuscript):

"Initially, we examined the distribution of three crash types across various variables to explore their relationships with a binary outcome. These variables included lighting conditions, speed limit, time of day, and day of the week. Demographic details concerning cyclist casualties encompassed age and sex, while information about the crash partner included vehicle type, age, and sex. We set a significance level of  $p <$

0.2 to include risk factors in our multivariate analysis. Adjusted odds ratios (AORs) were computed using multivariate logistic regression with backward selection.

The multivariate logistic regression model equation was specified as:

$$\log\left(\frac{P(Y = 1)}{1 - P(Y = 1)}\right) = \beta_0 + \beta_1 X_1 + \beta_2 X_2$$

where  $P(Y = 1)$  denotes the probability of the outcome,  $\beta_0, \beta_1, \beta_2, \dots, \beta_p$  are the coefficients to be estimated, and  $X_1, X_2, \dots, X_p$  represent the predictor variables.

Before estimating the model, assumptions of logistic regression, such as linearity of the logit, absence of multicollinearity, and independence of observations, were evaluated.

An odds ratio (OR) greater than 1 indicated a positive association between the independent variable and the occurrence rate, while an OR less than 1 indicated a negative association. An OR of 1 suggested no association between the variables of interest and the outcomes.”

Secondly, this reviewer suggested that we should use the Odds ratios for interpreting and displaying the results in tables 1, 2, and 3. While we acknowledge this suggestion, we would like to clarify here that we adopted the commonly-used Chi-square tests to identify the distribution of three crash types across several independent variables. Instead of the univariate logistic regression, such a method has been proved as an efficient way to minimize type II errors, and has been widely employed in past studies of traffic injuries (e.g., a, b) and methodology (e.g., c).

a: Chen, P-L, Pai, C-W. Evaluation of injuries sustained by motorcyclists in approach-turn crashes in Taiwan. *Accident Analysis and Prevention*, 2019, 124, 33-39;

b: Chien, D-K., Hwang, HF, Lin, MR. Injury severity measures for predicting return-to-work after a traumatic brain injury. *Accident Analysis and Prevention*, 2017, 98, 101-107;

c: Maldonado G, Greenland S. Simulation study of confounder-selection strategies. *Am J Epidemiol* 1993, 138, 11, 923-936).

2.5 Chi square is not enough test to identify the direction and which segment of the given variable is significantly different???

**Author's response:** We appreciate this reviewer's comment. The reviewer is correct. Chi-square tests can be used for ascertaining the association of the dependent and independent variables. However, the direction of the independent variables can be untangled in the subsequent multivariate logistic regression models.

2.6 What was the adjustment made for??? And how???

**Author's response:** We appreciate this reviewer's comment. Each variable was adjusted for in the multivariate analysis. For instance, in Table 4, adjustments were made for crash day after accounting for other variables such as cyclist's sex, crash partner, and crash partner's age and sex.

2.7 The joint-crash effect: how it was measured statistically???

**Author's response:** Thank you for your valuable comment. We do apologize for not making our analysis clear. To clarify how joint-effect analysis was structured, we drew several figures below that help us respond to this reviewer.

As Figure A1 (X axis: speed limit; Y axis: percentage) and A2 report (X axis: Crash partner's age; Y axis: percentage), the joint effects of speed limit (two categories: rural ( $\geq 40$  mph) /urban (20–30 mph)] and crash partner's age (four categories:  $\leq 18$ , 19–40, 41–64, and  $\geq 65$ ) on overtaking crashes were examined, yielding eight combinations of interaction effects (i.e., 1. Rural x  $\leq 18$ ; 2. Rural x 19-40; 3. Rural x 41-64; 4. Rural x  $\geq 65$ ; 5. Urban x  $\leq 18$ ; 6. Urban x 19-40; 7. Urban x 41-64; 8. Urban x  $\geq 65$ ). All percentages of overtaking crashes among these eight combinations were compared, and the combination with the highest percentages for overtaking crashes is taken as the indicator variable. In this joint-effect analysis, the indicator variable "rural areas x crash partner's  $\geq 65$  years old" has the highest percentage of overtaking crashes. These results elucidated that overtaking crashes were more likely to occur when the cyclists were in rural areas and when involving  $\geq 65$ -year-old crash partners.

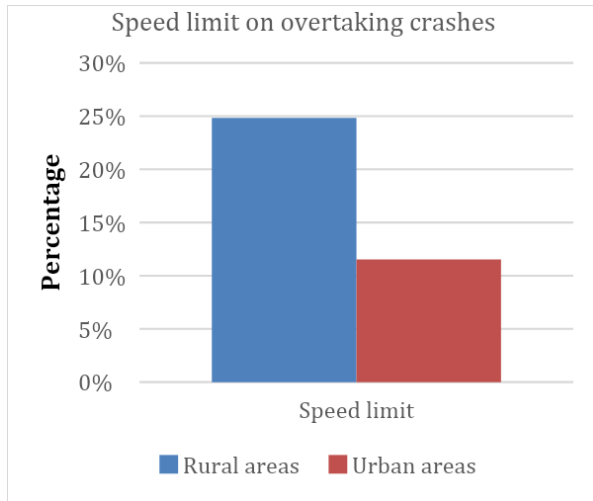

Figure A1

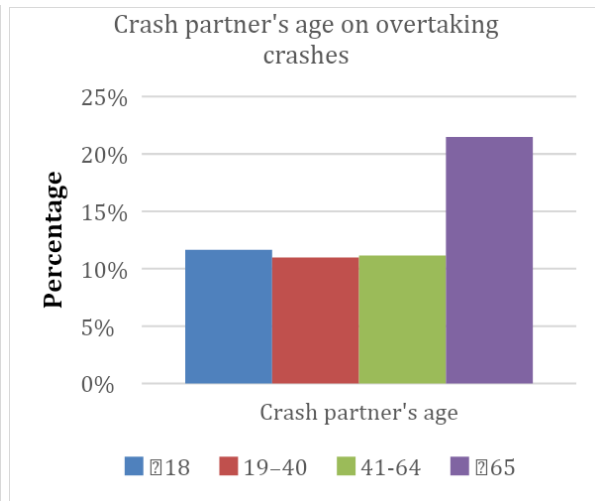

Figure A2

In practice, such a joint-effect analysis has been widely employed in medicine or traffic injury literature. One well-known paper by Weinstein et al. (i.e., m) was published in JAMA which examined the joint effect of physical activity and body mass index on diabetes in women. In this paper, Weinstein et al. pointed out that the beneficial effect of active lifestyle on type 2 diabetes was consistent across women with three BMI levels.

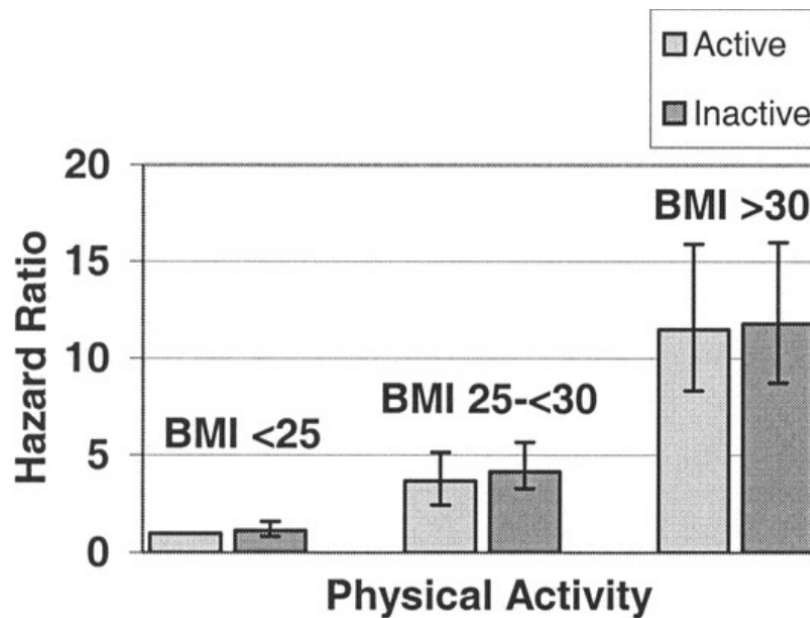

Another example is our previous paper published in Accident Analysis and Prevention in 2020 titled: Evaluating the combined effect of alcohol-involved and un-helmeted riding on motorcyclist fatalities in Taiwan. In this study, we specifically analysed the joint effect of alcohol use and helmet use on motorcyclist fatalities (i.e., n).

Interaction results for motorcyclist’s alcohol use with motorcyclist’s helmet use.

| Interaction term                                 | Odds ratio | p value | 95 % CI     |
|--------------------------------------------------|------------|---------|-------------|
| Blood alcohol level with helmet use <sup>a</sup> |            |         |             |
| 1 Blood alcohol positive and not using helmet    | 18.1       | < 0.001 | 15.9 – 20.4 |
| 2 Blood alcohol positive and using helmet        | 10.1       | < 0.001 | 9.3 – 11.1  |
| 3 Blood alcohol negative and not using helmet    | 2.3        | < 0.001 | 2.1 – 2.5   |
| 4 Blood alcohol negative and using helmet        | 1          | –       | 1           |

In addition, our previous paper published in BMC Public Health in 2023 titled: Walking against traffic and pedestrian injuries in the United Kingdom: new insights (i.e., o). In this study, we specifically analysed the joint effect to examine whether the beneficial effect of walking against traffic on injury severity may apply to different situations. By doing so, we were able to compare injury outcomes in walking against-traffic crashes against those in walking with-traffic crashes.

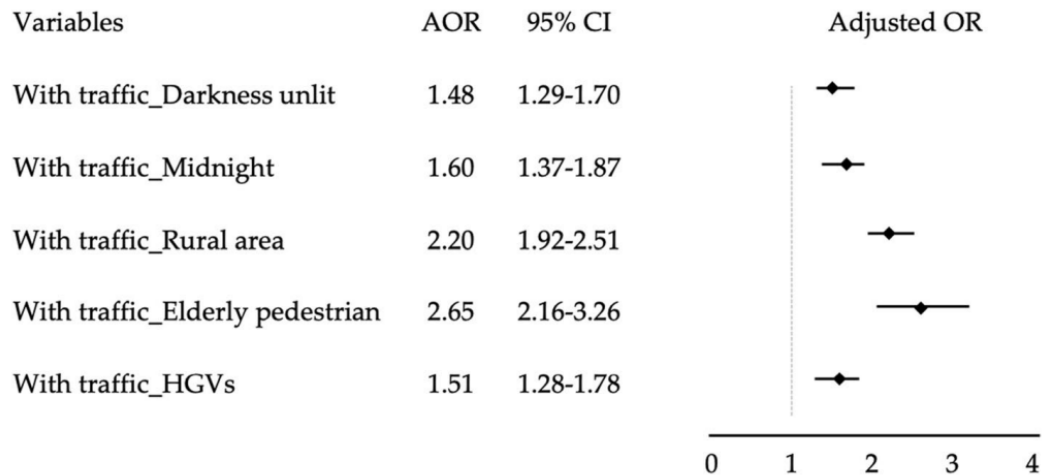

**Fig. 2** Joint effects of walking with traffic and other variables on pedestrian fatalities

We believe this detailed explanation clarifies our methodology.

Reference:

m: Weinstein A., Sesso, H., Lee, I., Cook, N., Manson, J., Buring, J., Gaziano, J., 2004. The relationship of physical activity vs body mass index with type 2 diabetes in women. JAMA 290: 1188-1194.

n: Wiratama, B., Chen, P., Ma, S., Chen, Y., Saleh, W., Lin, H., Pai, C., 2020. Evaluating the combined effect of alcohol-involved and un-helmeted riding on motorcyclist fatalities in Taiwan. Accident Analysis and Prevention, 143, 105594.

o: Widodo, A. F., Chen, C., Chan, C. W., Saleh, W., Wiratama, B. S., & Pai, C. W. (2023). Walking against traffic and pedestrian injuries in the United Kingdom: new insights. BMC public health, 23(1), 2205.

## Reviewer #3: Areas for Improvement:

### 3.1 Clarity and Conciseness:

Some sections of the text are verbose and could benefit from more concise language. For instance, the detailed descriptions of statistical methods and results could be streamlined without losing essential information.

Simplifying the language and structure would enhance readability and accessibility, particularly for readers who are not specialists in the field.

**Author's response:** We appreciate the reviewer's valuable suggestions. Concerning two reviewers who recommended extending several sections (i.e., reviewer #2 asked us to explain more on multivariate regression models and reviewer #4 requested for further discussions), we maintained a neutral stance for the time being. Nonetheless, we have revised the introduction to provide a clearer context and expanded our descriptions in the discussion section to provide broader insights into the implications of our findings. Additionally, detailed descriptions of the statistical methods have been included in the methods section, aimed at enhancing readability and accessibility for our readers.

### 3.2 Detailed Interpretation of Results:

While the results section provides extensive data, there is limited interpretation of what these results mean in practical terms. Adding more context about how these findings could influence policy or infrastructure design would be valuable. Discussing potential interventions based on the identified risk factors, such as specific infrastructure improvements or policy changes, would strengthen the practical implications of the study.

**Author's response:** We appreciate the reviewer's comment and suggestion. We have revised the discussion section of the manuscript and added one recommendation section to address findings that could potentially influence policy or infrastructure as follows (please refer to lines 404-412 on pages 23-24 of the manuscript):

#### "Recommendations

For overtaking crashes, we recommend implementing 'Share the Road' warning signs, especially in rural areas, and developing specialized cognitive training programs for elderly drivers. Regarding rear-end crashes, our suggestions include improving illumination during night time and implementing speed control measures on rural road segments. For door crashes involving parked cars, we propose enhancing driver sight triangles and increasing cyclist visibility. Moreover, implementing a two-stage door opening mechanism and an automatic



detection device in vehicles to alert drivers of bicycles approaching from behind could potentially be beneficial.”

### 3.3 Comparative Analysis:

Including a comparative analysis with similar studies from other countries could provide a broader context for the findings and highlight whether these risk factors are unique to the UK or consistent globally.

Discussing how the UK’s findings compare with those from the United States or other European countries, especially concerning the impact of infrastructure and vehicle types, could offer valuable insights:

**Author’s response:** We appreciate the reviewer’s comment. To our knowledge, no comparative analysis from other countries has been conducted for the three crash types (overtaking, rear-end, and door crashes). In addition, it is out of the scope of the current research to obtain crash data from other countries and conduct a large scale of comparative analysis. However, in our introduction sections, we have reviewed previous studies that focused on risk factors for these crash types individually or collectively on road segments (such as vehicle volume, traffic density, and number of lanes).

In the discussion section, we have discussed our findings with those of other studies in the US or elsewhere. For instance, previous analyses of overtaking crashes highlighted risk factors such as speeds exceeding 10 mph and the presence of pick-up trucks. Rear-end crashes were associated with conditions such as darkness, unlit surroundings, midnight hours, and reduced cognitive capabilities. Door crashes were found to be influenced by factors including urban roadways and the presence of taxis.

3.4 Providing more detailed information about the methodology, particularly the criteria for excluding certain data points, would enhance transparency. For example, explaining why specific demographic data were incomplete and how this might affect the results would be useful.

A discussion on the limitations of the data and the potential biases introduced by police reporting practices could provide a more nuanced understanding of the findings.

**Author’s response:** We appreciate the reviewer’s comment. To clarify the reasons for excluding junction cases and cyclists/motorcyclists as crash partners, we have added the following statements in the Methods section (please also kindly see lines 168 to 174; pages 9-10 in the manuscript):

“On a cautionary note, we removed junction cases to avoid the variability introduced when exogenous factors, such as junction geometry and control measures, are present at junctions. Furthermore, the cases involving other cyclists and motorcyclists were removed as we focused on vehicle-cycle crashes only. Missing data on sex, age, or speed limits were also excluded in the analysis. Excluding these data may impact our results in a marginal scale, as these data are likely to be single-bicycle crashes that in nature be underreported in police crash dataset [e.g., p]. “

Regarding the limitation of police reported crash data, the following statements have been added to the manuscript (please also kindly see lines 378 to 391; pages 22-23 in the manuscript):

“This study had several limitations that warrant acknowledgement. First, the substantial underreporting of nonfatal casualties to the police, particularly casualties involving cyclists not obligated to report accidents, is a critical factor to consider. Such underreporting, as highlighted by the U.K. Government’s Department for Transport, likely results in the incomplete representation of nonfatal and ‘slight’ casualties in road casualty data. Second, the STATS19 data utilised in this study lack critical variables, including precrash speeds, specific geometric characteristics of roadways, data regarding alcohol and illicit substance use, and cyclist speed at the time of an accident. Moreover, critical exposure data—such as those related to traffic flow, rider or driver experience, and other elements of risk exposure—are absent, and the absence of such details limits our ability to fully account for potential variations resulting from unobserved factors in the analyses. Finally, this study did not explore annual trends in each type of bicycle crash over the 30-year study period; investigating such trends could provide insights regarding changing behaviours among cyclists and motor vehicle drivers as well as the effects of legislative changes for road speed limits.”

p. Watson, Angela, Barry Watson, and Kirsten Vallmuur. "Estimating under-reporting of road crash injuries to police using multiple linked data collections." *Accident Analysis & Prevention* 83 (2015): 18-25.

### 3.4 Visual Aids:

Adding more visual aids, such as graphs or charts, could help in visualizing the key findings and making the data more accessible to readers.

A geographic distribution map showing where different types of crashes are more prevalent could add an interesting dimension to the analysis.

**Author's response:** We appreciate the reviewer's suggestions. We firstly reported our sampling by using a flowchart that helps readers understand what data were excluded and included in the analyses. Although we presented our statistical analyses in a traditional way (Tables 1 to 4), we illustrated a forest plot demonstrating the joint effects of several variables on the three crash types when other variables were controlled for (please refer to lines 213 to 276; pages 12-17 in the manuscript).

Regarding the geographic distribution map illustrating where these crash types were more prevalent, our research objective does not primarily emphasize the geographic effects of these three crash types. Rather, we focused on identifying risk factors for these crash types. While we appreciate this reviewer's valuable comment on this, we have identified this as an important research area as follows (please refer to lines 398 to 402; page 23 in the manuscript):

“Future research directions could involve integrating GPS (Global Positioning System) data and weather conditions to analyse both the injury frequency and fatalities of bicycle crashes on road segments. Additionally, exploring the potential of autonomous vehicles for detecting approaching bicycles for door-crashes and implementing AI-controlled lighting systems in rural areas for cyclist detection could be promising areas for further study.”

### 3.5 Future Directions:

Including a section on future research directions would be beneficial. Identifying gaps in the current research and suggesting areas for further investigation could guide subsequent studies.

Discussing the potential impact of emerging technologies, such as autonomous vehicles and advanced cyclist detection systems, on these crash types could provide a forward-looking perspective.

**Author's response:** We appreciate the reviewer's comment and suggestion. We have revised the discussion section of the manuscript and added one future research section (please refer to lines 398 to 402; page 23 in the manuscript). Furthermore, we have added one new section “Recommendation” that reports potential intervention points (please refer to lines 404-412 on pages 23-24 of the manuscript):

#### “Recommendations

For overtaking crashes, we recommend implementing 'Share the Road' warning signs, especially in rural areas, and developing specialized cognitive training programs for elderly drivers. Regarding rear-end crashes, our suggestions include improving illumination during night time and implementing speed control

measures on rural road segments. For door crashes involving parked cars, we propose enhancing driver sight triangles and increasing cyclist visibility. Moreover, implementing a two-stage door opening mechanism and an automatic detection device in vehicles to alert drivers of bicycles approaching from behind could potentially be beneficial.”

Future research directions:

“Future research directions could involve integrating GPS (Global Positioning System) data and weather conditions to analyse both the injury frequency and fatalities of bicycle crashes on road segments. Additionally, exploring the potential of autonomous vehicles for detecting approaching bicycles for door-crashes and implementing AI-controlled lighting systems in rural areas for cyclist detection could be promising areas for further study.”

Reviewer #4: This Study is technically sound and has potential to add to the body of knowledge involving bicycle riding safety in the UK and everywhere across the globe. It has adhered to the research and publication ethics, however, the study still need revision on some of the key identified areas which i have pointed out, starting from abstract, background, results and discussions.

#### 4.1 Abstract

The abstract is lacking the background section, please see the comment on the pdf

This abstract is lacking the background section, which must start when presenting structured abstract. Also there is no objective put here, but rather the research problem investigated.

**Author's response:** We appreciate the reviewer's comment and suggestion. We have revised the abstract to add background and objects as follows (please refer to lines 23 to 27; page 2 in the manuscript):

“Background: Relevant research has provided valuable insights into risk factors for bicycle crashes at intersections. However, few studies have focused explicitly on three common types of bicycle crashes on road segments: overtaking, rear-end, and door crashes.

Objective: This study aims to identify risk factors for overtaking, rear-end, and door crashes that occur on road segment.”

##### 4.1.1 Abbreviations should be defined when they are first mentioned

**Author's response:** We appreciate the reviewer's suggestion. We have revised the abstract to include the full definitions of abbreviations upon their first appearance as follows (please refer to lines 31; page 2 in the manuscript).

“Abstract: AOR (adjusted odds ratio)”

#### 4.2 Introduction

4.2.1 The authors did not explain the context of the previous study, where this current study was based, but only cited it. For my comments also see the pdf with my comments on this section

4.2.2 See the comments above on the abstract to enhance this one

4.2.3 Highlight some key findings of this previous study here to avoid making the readers look for the findings on their own. The point of scientific writing is to make the work easy to understand

**Author's response:** We appreciate the reviewer's comment and suggestion. We have revised our introduction section to include the reviewer's suggestion, providing an explanation of the previous study and emphasizing our key findings accordingly as follows (please refer to lines 101 to 106; page 5 in the manuscript):

“The primary objective of this study, building on our previous research into risk factors related to overtaking, rear-end, and door crashes, is to conduct a more comprehensive investigation. Specifically, Pai identified buses and coaches as common crash partners in overtaking crashes; poor visibility, traversing manoeuvres, and teenage cyclists as risk factors for rear-end crashes; and built-up areas as a risk factor for door crashes.”

#### 4.3 Methodology

The method section was described well and is adequate, although we need to know whether normality checks were conducted.

**Author's response:** Thank you for your positive feedback on the method section and for your valuable suggestion regarding normality checks. We employed multivariate logistic regression models in our investigation, which do not require assuming the normality of the predictor variables. Logistic regression is resilient to deviations from normality as it estimates the likelihood of a binary outcome instead of assuming a normal distribution of the variables. Consequently, we refrained from performing formal normality assessments for the predictor variables.

#### 4.4 Results

This area still requires more work. The way the results were presented was hasty, and we need to redo some of the highlighted sections. For example, a separate Univariate table is needed as Table 1.

4.4,1 I think you need a joint univariate table of all factors studied that combining it all in the Bivariate table. It is a lazy way of reporting that require a reader to tease out proportions on their own. address this

**Author's response:** We appreciate the reviewer's comment. In response to the suggestion for a joint univariate table of all studied factors, we acknowledge the importance of presenting comprehensive data that is readily interpretable. Our analysis

included an examination of crash type distributions across multiple independent variables. To explore these relationships, we employed Chi-square tests. Variables with significance levels below 0.2 were identified to minimize type II errors and were considered significantly associated with the outcome variables ( $p < 0.05$ ). These variables were subsequently included in multiple logistic regression models.

We utilized stepwise logistic regression to estimate odds ratios while controlling for specific factors, following a methodological approach well-established in traffic injury studies (e.g., references a and b) and detailed in previous research (e.g., reference c). This approach allows for a nuanced understanding of how various factors interact to influence crash types, ensuring our findings are robust and informative. This methodological approach is well-established in the study of traffic injuries (e.g., references a and b) and has been detailed in previous studies (e.g., reference c).

a: Chen, P-L, Pai, C-W. Evaluation of injuries sustained by motorcyclists in approach-turn crashes in Taiwan. *Accident Analysis and Prevention*, 2019, 124, 33-39;

b: Chien, D-K., Hwang, HF, Lin, MR. Injury severity measures for predicting return-to-work after a traumatic brain injury. *Accident Analysis and Prevention*, 2017, 98, 101-107;

c: Maldonado G, Greenland S. Simulation study of confounder-selection strategies. *Am J Epidemiol* 1993, 138, 11, 923-936).

#### 4.4.2 Use one decimal place and not two

**Author's response:** We appreciate this reviewer's comment. We have updated our tables (Tables 1-4) to display data with one decimal place instead of two (please refer to lines 213 to 276; pages 12-17 in the manuscript).

#### 4.4.3 After inserting a combined univariate table, please remove these percentages, as they are very misleading

**Author's response:** We appreciate this reviewer's comment. However, presenting percentages is crucial for demonstrating the distribution among each crash type and others. Therefore, we have decided to continue using percentages as presentation in our manuscript.

#### 4.4.5 Tables: Here put frequencies/percenatgase and removed all the percentages from the table. the same applies to all other tables

**Author's response:** We appreciate this reviewer's comment. Nevertheless, it is essential to use percentages to clearly demonstrate the distribution of each crash type across a set of variables. By reporting these percentages, we are able to identify whether one certain variable was over-involved in one crash type. Therefore, we have opted to maintain the use of percentages in our presentation.

4.4.6 All most all the bivariate table has not been interpreted. but summarize using phrases like serveral variables as shown in table 2.

**Author's response:** We appreciate this reviewer's comment. We have revised our results section to incorporate the reviewer's suggestion and rephrase the sentence accordingly (please refer to lines 215 to 229; page 13 in the manuscript):

"Several variables in Table 2 reveal significant differences between rear-end crashes and non-rear-end crashes. Specifically, a higher proportion of rear-end crashes occurred under darkness-unlit conditions (50.2%) compared to darkness-lit conditions (37.5%). Additionally, rear-end crashes were more prevalent in rural areas with speed limits of  $\geq 40$  mph (43.0%) compared to urban areas with speed limits of 20–30 mph(33.1%). Crashes involving crash partners aged  $\geq 65$  accounted for 39.7% of rear-end crashes, which was higher compared to other age groups (age 41–64: 33.0% and  $\leq 18$ : 36.0%). Furthermore, rear-end crashes were more likely to occur during midnight (47.6%) compared to rush hours (36.3%). Taxis were frequently involved in rear-end crashes (42.4%), as were male crash partners (36.8%). These findings highlight the significant influence of various factors on the likelihood of rear-end crashes. Variables such as darkness-unlit conditions, higher speed limits in rural areas, crash time, and characteristics of the crash partner all emerged as significant determinants. Specifically, rear-end crashes were notably more prevalent under darkness-unlit conditions, in rural areas with higher speed limits, during midnight hours, and involving certain characteristics of crash partners. Importantly, these associations were statistically significant, as indicated by the Chi-squared test ( $p < 0.001$ )."

4,4,7 Do inteprete the results individually for all the significant factors.

**Author's response:** We appreciate this reviewer's comment. We have revised our discussion section to incorporate the reviewer's suggestion and rephrase the sentence accordingly (please refer to lines 232 to 248; pages 14-15 in the manuscript):

"As shown in Table 3, several variables can contribute to door crashes involving bicycles. Door crashes predominantly occurred in urban areas with speed limits of 20-30 mph (6.22%), while a significantly lower proportion occurred in rural



areas with speed limits  $\geq 40$  mph (0.45%). These crashes were overrepresented during non-rush hours (5.54%) and rush hours (4.94%) compared to evening (4.26%) and midnight (2.35%). Cyclists were more frequently involved in door crashes on weekdays (5.35%) than weekends (3.73%). As many as 8.21% of all female cyclists were involved in door crashes, which is higher than the involvement rate among males (4.24%). Taxi and private hire cars were overinvolved in door crashes (10.55%) compared to cars (5.17%) and buses/heavy goods vehicles (3.13%). Crash partners aged  $\leq 18$  years (5.22%) and 19-40 years (5.26%) were disproportionately involved in door crashes compared to older age groups, and female crash partners were overrepresented in door crashes (7.42%) compared to males (4.23%). These results were statistically significant, as indicated by the Chi-squared test ( $p < 0.001$ ). They suggest that various factors including traffic conditions (rural areas, crash time), cyclist demographics (younger age, gender), and characteristics of the crash partner (taxi/private hire cars)—significantly contribute to the likelihood of door crashes involving cyclists.”

4.4.8 where are the corresponding p-values. include them for all the significant risk factors

**Author’s response:** We appreciate this reviewer’s comment. We have revised our Results section to include the reviewer’s suggestion and have added the corresponding p-values accordingly (please refer to lines 253 to 272; page 16 in the manuscript):

For example: “(AOR = 2.912, 95% CI = 2.384–3.556;  $p < 0.001$ ).”

4.4.9 Here, present both the crude and adjusted odd ratios

**Author’s response:** We appreciate the reviewer’s comment. In response, we have focused on presenting the adjusted odds ratios (AOR) and their corresponding 95% confidence intervals in our manuscript.

To address the analysis of crash types across various independent variables, we conducted Chi-square tests to assess the association between dependent and independent variables. The direction of the independent variables will be clarified in the subsequent multivariate logistic regression models.

Significant variables identified through stepwise selection were included in the multiple logistic regression models. The adjusted odds ratios (AOR) and their 95% confidence intervals were then calculated from these final models. This approach, widely used in traffic injury studies (e.g., a, b), ensures robust methodology by controlling for other variables (e.g., c).

a: Chen, P-L, Pai, C-W. Evaluation of injuries sustained by motorcyclists in approach-turn crashes in Taiwan. *Accident Analysis and Prevention*, 2019, 124, 33-39;

b: Chien, D-K., Hwang, HF, Lin, MR. Injury severity measures for predicting return-to-work after a traumatic brain injury. *Accident Analysis and Prevention*, 2017, 98, 101-107;

c: Maldonado G, Greenland S. Simulation study of confounder-selection strategies. *Am J Epidemiol* 1993, 138, 11, 923-936).

4.4.10 Also do interpret these results. For instance what does the odd ratio of 2.93 mean in this case?

**Author's response:** We appreciate the reviewer's comment and suggestion. We have revised our results section to incorporate the reviewer's suggestion and have interpreted the meaning of odds ratios in our findings accordingly (please refer to lines 279 to 286; pages 17-18 in the manuscript):

"The results identified several key risk factors for both overtaking and rear-end crashes. The risk of overtaking crashes showed a significant increase of 193% in rural areas when elderly drivers were involved (AOR = 2.93, 95% CI = 2.79–3.08), and similarly when heavy goods vehicles (HGVs) were the crash partner (AOR = 2.62, 95% CI = 2.46–2.78). Elderly cyclists also faced a higher risk of overtaking crashes on weekends (AOR = 1.56, 95% CI = 1.34–1.81).

Regarding rear-end crashes, the risk increased notably with unlit darkness during midnight (AOR = 1.68, 95% CI = 1.48–1.90) and was significantly higher in rural areas (AOR = 2.15, 95% CI = 2.01–2.31)."

4.4.11 you look at risk factors and not only environment factors, what about factors like sex, age. are they from the environment too, and yet you included them.

**Author's response:** We appreciate the reviewer's comment. In our multivariate logistic regression results in Table 4, we analyzed and presented such factors such as cyclist's sex and age for each crash type (please refer to lines 275 to 276; page 17 in the manuscript). Moreover, in our joint-effect analysis, cyclist's age ( $\geq 65$ -year-old cyclist) was combined and analyzed with other variables.

## 4.5 Discussion

The section also needs serious work, especially on the way the findings were discussed. The authors should consider discussing their own findings rather than those of other studies. There is also a need to have a section for recommendations rather than merging it within result

4.5.1 You dont need this type of writing, just discuss the findings

**Author's response:** We appreciate the reviewer's comment. We have revised our discussion section to delete the paragraph as the reviewer's suggestion as follows (please refer to lines 305; page 19 in the manuscript):

“Delete: These findings warrant further discussion and thus are elaborated on in this section of this paper.”

You have not discussed the findings. Yes you found HGVs a risk for overtaking crash, so tell us why you think that is a risk factor. in other word explain your findings and then place it in the context of other study

**Author's response:** We appreciate the reviewer's comment and suggestion. We have revised our discussion section to integrate the reviewer's suggestion and provide a discussion on how heavy goods vehicles (HGVs) pose a risk for overtaking crashes accordingly as follows (please refer to lines 308 to 317; page 19 in the manuscript):

“These findings align with previous research that identified elderly drivers, speeds exceeding 10 mph, and the presence of pick-up trucks as factors contributing to increased risk for overtaking crash. Specifically, HGVs possess several characteristics that amplify this danger. Their large blind spots make it difficult for drivers to see cyclists, increasing the likelihood of crashes during overtaking. Additionally, HGVs are less maneuverable compared to passenger cars, which reduces their ability to avoid crashes if cyclists suddenly enter their path. The speed and distance perception issues between HGVs and cyclists further complicate the judgment of safe overtaking gaps. Furthermore, HGVs require longer stopping distances due to their size and weight, which can lead to severe consequences if a sudden need to brake arises.”

4.5.3 Do not discuss other people's findings, just discuss your findings and only state whether it agrees or disagrees with what Pai et al found for example

**Author's response:** We appreciate the reviewer's comment and suggestion. We have revised our Discussion section to incorporate the reviewer's suggestion and provide a

discussion on our findings, comparing them with previous studies accordingly (please refer to lines 318 to 322; pages 19-20 in the manuscript):

“Regarding the association with buses or HGVs, our findings are consistent with existing research suggesting that time pressures on HGV drivers for timely loading and unloading might lead to more reckless driving. Specifically, our results align with the observations made by Pai et al., who also mentioned higher crash rates involving buses or HGVs, supporting the idea that these time pressures contribute to increased crash risks.”

#### 4.5.4 Take this to the recommendation section

**Author’s response:** We appreciate the reviewer’s comment and suggestion. We have added a recommendations section (please refer to lines 404-412; pages 23-24 of the manuscript):

##### “Recommendations

For overtaking crashes, we recommend implementing 'Share the Road' warning signs, especially in rural areas, and developing specialized cognitive training programs for elderly drivers. Regarding rear-end crashes, our suggestions include improving illumination during night time and implementing speed control measures on rural road segments. For door crashes involving parked cars, we propose enhancing driver sight triangles and increasing cyclist visibility. Moreover, implementing a two-stage door opening mechanism and an automatic detection device in vehicles to alert drivers of bicycles approaching from behind could potentially be beneficial.”

4.5.5 Good use of references but first tells why you found what you found. And again your study was looking at comparing the risk factors for overtaking crashes with what was previously found in your study and the findings of that study needed to be described well in this study too

**Author’s response:** We appreciate the reviewer’s comment and suggestion. We have revised our Discussion section to incorporate the reviewer's suggestion and provide a discussion on our findings, comparing them with previous studies accordingly (please refer to lines 328 to 332; page 20 in the manuscript):

“We found that as individuals age, their risk of being involved in road accidents increases, primarily due to declines in cognitive capabilities. Our study corroborates these findings by showing that older cyclists are more susceptible to accidents during overtaking maneuvers, which can be attributed to diminished reaction times and impaired decision-making abilities, their health, and their driving performance.”

4.5.6 I think you need to also link this to delays in reacting as compared to the younger cyclist or driver.

**Author's response:** We appreciate this reviewer's comment. We have revised our Discussion section to integrate the reviewer's suggestion and provide a discussion on delays in reaction among elderly cyclists or drivers accordingly (please refer to lines 328 to 332; page 20 in the manuscript):

“We found that as individuals age, their risk of being involved in road accidents increases, primarily due to declines in cognitive capabilities. Our study corroborates these findings by showing that older cyclists are more susceptible to accidents during overtaking maneuvers, which can be attributed to diminished reaction times and impaired decision-making abilities, their health, and their driving performance.”

4.5.7 This is supposed to be a recommendation but first of all it is not right. it is not what you found but what you think is making more elder drivers to get into overspreading crashes. So recommend only based on what you found and not based on what you think.

**Author's response:** We appreciate the reviewer's comment and suggestion. We have revised our discussion section to integrate the reviewer's suggestion as follows (please refer to lines 339 to 346; pages 20-21 in the manuscript):

“Based on our study's findings, we recommend the development of specialized interventions to improve road safety for elderly cyclists. Our analysis reveals that older cyclists are at a higher risk of being involved in overtaking crashes, with this increased risk being strongly linked to declines in cognitive capabilities associated with aging. To address this issue, we advocate for the implementation of targeted cognitive training programs specifically designed for elderly cyclists. These programs should focus on enhancing critical skills such as reaction time, situational awareness, and decision-making abilities, which are crucial for reducing crash risk and improving overall road safety. “

4.5.7 Now this is a good statement that should have followed your first sentence, starting from the full stop after segments. then you can now show us how similar it is with what Pai and others found.

**Author's response:** We appreciate this reviewer's comment. If we understand this reviewer correctly, this reviewer makes a valid argument that Advanced Stop Lines (ASLs), also called bike boxes that had been implemented in the UK for decades, would be beneficial in reducing conflicts between cars and cyclists. However, our study focuses on cyclist crashes that occurred on road segments only (i.e., 20 metres away from junctions); as a result, we remain reserved with discussing this finding with this engineering measure (i.e., ASLs).

In addition to this, we routinely discussed our current findings with those of Pai; for instance, HGVs, unlit streets and midnight hours, and taxis have been similarly identified as a risk factor for overtaking crashes, rear-end crashes, and door crashes, respectively.

#### 4.6 discussions.

4.6.1 They need to tell us how they tried to minimize the biases that could have been introduced by the many study limitations identified for this study.

**Author's response:** We appreciate this reviewer's comment. One inherent problem with police-reported crash data is the variables not readily available, hereby causing unobserved heterogeneity across the observations. To overcome such a limitation, we estimated separate regression models, as suggested by Kim et al. (2006), for the three crash types; such an approach provides greater explanatory power compared to single overall models. Further, we conducted joint-effect analyses of several variables of interest that capture heterogeneity. In our previous studies, we adopted the above-mentioned approaches to overcome the inherent problem with a success (see, for example, Pai and Saleh, 2008; Pai and Jou, 2014).

To clarify this, the following statements have been added to the Discussion section of the manuscript (please refer to lines 391 to 397; page 23 in the manuscript):

“One inherent problem with police-reported crash data is the variables not readily available, hereby causing unobserved heterogeneity across the observations. To overcome such a limitation, we estimated separate regression models, as suggested by Kim et al. (e.g., d), for the three crash types; such an approach provides greater explanatory power compared to single overall models. Further, we conducted joint-effect analyses of several variables of interest that capture heterogeneity. In our previous studies, we adopted the above-mentioned approaches to overcome the inherent problem with a success (e.g., e, f).”

d: Kim, D., Washington, S., Oh, J., 2006. Modelling crash outcomes: new insights into the effects of covariates on crashes at rural intersections. *Journal of Transportation Engineering*. 132 (4), 282-292.

e: Pai CW, Jou RC, 2014. Cyclists' red-light running behaviours: An examination of risk-taking, opportunistic, and law-obeying behaviours. *Accident Analysis and Prevention*. 62,191-198.

f: Pai CW, Saleh W., 2008. Modelling motorcyclist injury severity by various crash types at T-junctions in the UK. *Safety Science*. 13, 98-98.

4.6.2 Present both the strength and limitations of the study. And you have really brought the limitation well, but my question would be, despite knowing all these why did you decided to carry on to utilised this dataset as opposed to others. Please tell us how you catered for these limitations as away of reducing bias that might have been introduced by them

**Author's response:** We appreciate this reviewer's comment. We have added a section discussing the strengths of our study before addressing its limitations as follows (please refer to lines 370 to 377; page 22 in the manuscript):

“The strengths of this study include the use of STATS19 datasets spanning from 1991 to 2020, which provides a robust statistical foundation and a broad perspective on trends in bicycle crashes. By focusing specifically on three crash types on road segments—overtaking, rear-end, and door crashes—the study provides a comprehensive and focused analysis, which can yield more actionable insights and more effective recommendations. The UK-based dataset ensures that the findings are particularly relevant for local policy and safety interventions. Additionally, the application of statistical techniques and the consideration of various factors, such as crash partner and time of day, enhance the validity and depth of the analysis.”

Dear Editors and Reviewers,

We greatly appreciate the valuable comments and suggestions raised by reviewers. Please very kindly see our responses below, as well as the revised manuscript. We would be glad if you could have our manuscript reviewed again.

Best regards,

Chih-Wei Pai (Prof)

Graduate Institute of Injury Prevention and Control College of Public Health

Taipei Medical University



Reviewer 2:

1.1 In the Abstract as well as in the results (main text) AOR sometimes expressed with three digits (decimals) and other places two decimals (please consider and use effective digits “decimals”).

**Author’s response:** We appreciate the reviewer’s comment and suggestions. All AORs have been amended to two decimals (Please refer to lines 34 to 40 on page 2 in the manuscript).

1.2 In the abstract “results section”: the AOR are sometimes very narrow (please explain).

**Author’s response:** We appreciate the reviewer’s comment and question. The narrow confidence intervals (CIs) for the adjusted odds ratios (AORs) indicate high precision in our estimates. This precision is primarily due to our large sample size, which reduces variability and enhances reliability. For example, the AOR for “male as crash partner” in overtaking crashes is 1.28 with a CI of 1.25-1.33, reflecting a strong effect size and contributing to the narrow CI. Variability and heterogeneity in the data can affect CI width. Risk factors with more consistent effects across the dataset often show narrower CIs (e.g., a).

a. Katz, M. H. (2011). *Multivariable Analysis: A Practical Guide for Clinicians and Public Health Researchers*.

1.3 In the introduction: word roundabouts are repeated “study demonstrated that roundabout significantly reduces -----“

**Author’s response:** We appreciate the reviewer’s comment and suggestions. We have revised the manuscript. (Please refer to lines 74 to 76; page 4 in the manuscript):

“One study found that roundabouts with dedicated cycle tracks significantly lower the risk of injury for cyclists compared to those without such bicycle infrastructure.”

1.4 In the rationale, the authors still need to emphasize the significance of the three types of crashes, this part of the introduction barely touched this point????

**Author’s response:** We appreciate the reviewer’s comment and suggestions. We have revised the manuscript. (Please refer to lines 104 to 110; pages 5 -6 in the manuscript):

“The high mortality rate from crashes on road segments underscores the significant risks linked to overtaking, rear-end, and door crashes. Overtaking, involving high-speed maneuvers, greatly increases the likelihood of severe accidents. Rear-end crashes, frequently triggered by sudden stops or aggressive tailgating, pose a persistent threat to cyclists. Furthermore, injuries sustained by cyclists striking an opening car door can be devastating due to the impacts from the door, ground, or vehicles behind. These critical issues highlight the urgent need for identifying risk factors for these crashes.”

Statistical analysis:

1.5 - Rationale for considering p value of 0.2 at the univariate (bivariate) level to be incorporated in the multiple Logistic regression models???

**Author's response:** We appreciate the reviewer's comment and question. In the first and second round of review, this reviewer expressed concerns over our use of Chi-square tests to examine the relationship between three crash types and the independent variables. We have now opted to estimate the crude odds ratio by univariate logistic regressions. Please kindly see Table 4 lines 259 to 260; page 15 in the manuscript.

1.6- How the data were handled statistically: descriptive and inferential methods should be mentioned in this section

**Author's response:** We appreciate the reviewer's comment and question. In response to your comment, we have revised the section on statistical handling to provide a more comprehensive explanation of both the descriptive and inferential methods employed. (Please refer to lines 182 to 191; page 9 in the manuscript).

"We initially utilized descriptive statistics to examine the distribution of crash types across various variables such as lighting conditions, speed limit, time of day, and day of the week. Demographic details concerning cyclist casualties encompassed age and sex, while information about the crash partner included vehicle type, age, and sex. This preliminary analysis provided a general picture of basic characteristics of the data and identification of potential patterns. For inferential analysis, we applied the Chi-squared test to investigate associations between crash type and various factors, including cyclist and motorist characteristics, vehicle features, roadway conditions, and temporal variables. We then estimated crude odds ratios by estimating univariate logistic regression and adjusted odds ratios by multivariate logistic models, respectively."

1.8- What type of model was used (stepwise, or else), how the model was tested to be fit???

**Author's response:** We appreciate the reviewer's comment and question. We used multivariate logistic regression with backward selection to compute adjusted odds ratios (AORs). This method involves initially including all potential predictors and then iteratively removing the least significant variables based on their p-values.

In terms of model fit statistics, the final models were chosen based on the  $\rho^2$  statistics (e.g., b). The  $\rho^2$  statistics for the estimated models range from 0.327 to 0.398, indicating a reasonable model fit.

- b. Ben-Akiva, M. E., & Lerman, S. R. (1985). *Discrete choice analysis: theory and application to travel demand* (Vol. 9). MIT press.

1.9- How the variables were categorized to be suitable for the inclusion of logistic regression analysis?

**Author's response:** We appreciate the reviewer's comment and question. Considering findings from past studies and selecting the model with the most parsimonious and robust statistical properties (e.g., goodness of fit, reasonable parameter magnitudes, and t-statistics), the variables were categorized and explained as follows:

First, age data were divided into four categories: ≤18 (not of legal driving age), 19–40, 41–64, and ≥65 (defined as older age by WHO standards). This classification highlights the different risk profiles associated with each age group.

The variable "time of crash" was classified into four periods—midnight (00:00–06:00), rush hours (07:00–08:00 and 17:00–18:00), non-rush hours (09:00–16:00), and evening (19:00–23:00)—to account for fluctuations in traffic patterns and accident likelihood throughout the day.

Speed limits were categorized by location into two types: nonbuilt-up areas (rural, ≥40 mph) and built-up areas (urban, 20–30 mph).

Day of the week was grouped as either weekday or weekend to evaluate variations in crash patterns.

These classifications have been commonly adopted in safety literature (e.g., c; d).

- c. Widodo, Akhmad Fajri, et al. "Walking against traffic and pedestrian injuries in the United Kingdom: new insights." *BMC public health* 23.1 (2023): 2205.
- d. Wiratama, Bayu Satria, et al. "Joint effect of heavy vehicles and diminished light conditions on paediatric pedestrian injuries in backover crashes: a UK population-based study." *International journal of environmental research and public health* 19.18 (2022): 11689.

110- The reference group in the multivariate regression table is not consistent along the three types of crashes??? Please explain.

**Author's response:** We appreciate the reviewer's comment and question. The reference groups in the univariate and multivariate analysis have been assigned consistent. Please kindly see Table 4 lines 259 to 260; pages 14-15 and Table 5 lines 292 to 293; pages 16-17 in the manuscript.

1.11- Joint sensitivity analysis should be mentioned in this section "indication, methods and output"

**Author's response:** We appreciate the reviewer's insightful comments and suggestions. To illustrate the effectiveness of models with joint effects, we found that these models produced a

higher log-likelihood at convergence and demonstrated an improved overall fit, as indicated by a better  $\rho^2$  statistic.

Moreover, we performed a likelihood ratio test (e.g., e) to confirm the superiority of the joint effects models over the general models. The test statistic is given by:

$$\chi^2 = -2[LL(\beta_G) - LL(\beta_J)]$$

Where  $LL(\beta_G)$  represents the log-likelihood at convergence for the general model, and  $LL(\beta_J)$  is for the joint effects model. This statistic follows a  $\chi^2$  distribution, with degrees of freedom equal to the difference in the number of parameters between the general and joint effects models.

- e. Vuong, Q.H., 1989. Likelihood ratio tests for model selection and non-nested hypothesis. *Econometrica* 57, 307-333.

Results:

1.12- The previous comments on using the Chi-square test remained the same??? Non-specific, non-parametric test and can't point out to the direction of significance???

**Author's response:** We appreciate this reviewer's comment. In addition to the multivariate logistic regression, we have now estimated the univariate logistic regression models. Please kindly see Table 4 lines 259 to 260; pages 14-15 and Table 5 lines 292 to 293; pages 16-17 in the manuscript.

1.13- What software used to produce figure 2???

**Author's response:** We appreciate the reviewer's comment and question. We recreated the figure from the previous article (e.g., f) using Photoshop and then edited it in PowerPoint.

- f. Pai C-W. Overtaking, rear-end, and door crashes involving bicycles: an empirical investigation. *Accid Anal Prev.* 2011;43(3):1228-35.

## Review 4

4.1 This has been addressed but in the main document start with background under the background sentences, conclude it with the objective, instead of presenting it as a separate paragraph.

**Author's response:** We appreciate the reviewer's comment and suggestions. We have revised the manuscript. (please refer to lines 23 to 27 ; page 2 in the manuscript):

"**Background and Objective:** Relevant research has provided valuable insights into risk factors for bicycle crashes at intersections. However, few studies have focused explicitly on three common types of bicycle crashes on road segments: overtaking, rear-end, and door crashes. This study aims to identify risk factors for overtaking, rear-end, and door crashes that occur on road segments."

4.2 I understand this response; however, you need to conduct a normality check for all continuous variables like age and others like distance. This helps you to present either the mean age or the median age

**Author's response:** We appreciate the reviewer's comment and suggestions. Normality check for continuous variables is needed only while estimating a linear regression model. In our study, we estimated several logistic models in which testing for normality and homoscedasticity is not needed. For a comprehensive discussion on the derivation of logistic regression models, see Hosmer et al. (e.g., g).

g. Hosmer Jr, David W., Stanley Lemeshow, and Rodney X. Sturdivant. Applied logistic regression. John Wiley & Sons, 2013.

4.3 N(%) consider using this type of reforestation and removed the percentage signs from the table

**Author's response:** We appreciate the reviewer's comment and suggestions. We have removed the percentage signs and replaced them with "n (%)" in the tables 1, 2 and 3. (Please refer to lines 221-222 of page 11; lines 237 -238 of pages 12- 13; lines 254-255 of pages 13- 14 in the manuscript).

4.4 Data analysed should replace this, you didn't collect data

**Author's response:** We appreciate the reviewer's comment and suggestions. We have revised the manuscript. (Please refer to lines 160; page 8 in the manuscript):

"Data analysis"

4.5 I insist this be removed, but keep the proportion there and take this up and say N(%) or read other publication to see how this is presented

**Author's response:** We appreciate the reviewer's comment and suggestions. We have removed the percentage signs and replaced them with "n (%)" in the table1, 2 and 3. Please refer to lines 221-222 of page 11; lines 237 -238 of pages 12- 13; lines 254-255 of pages 13- 14 in the manuscript.

4.6 This has not been fully addressed. What the authors did was just introduced the corresponding Odds Ratios and P-Values but no result interpretation. Consider doing something like this, "having a HGVs as crash partners had 2.9 times higher likelihood of being involved in overtaking crash", something like this for all the significant variables.

**Author's response:** We appreciate the reviewer's comment and suggestions. We have revised the manuscript. (Please refer to 293 to 295; page 17 in the manuscript):

"In overtaking crashes, the presence of heavy goods vehicles (HGVs) as partners increases the likelihood by 1.3 times (AOR = 1.30, 95% CI = 1.27-1.33; p < 0.001)."

4.7 This has now been introduced, however, start with what you found, then bring the reason supporting those findings and lastly place it in the context of other study and cite it.

**Author's response:** We appreciate the reviewer's comment and suggestions. We have outlined the reasons supporting these findings and, finally, situated them within the context of existing research, providing appropriate citations. (Please refer to lines 344 to 347; pages 19-20 in the manuscript):

"Their large blind spots make it difficult for drivers to see cyclists, increasing the likelihood of crashes during overtaking [e.g., c]. Additionally, HGVs are less manoeuvrable compared to passenger cars, which reduces their ability to avoid crashes if cyclists suddenly enter their path [e.g., d]. The speed and distance perception issues between HGVs and cyclists further complicate the judgment of safe overtaking gaps[e.g., e]."

c. Marshall, Russell, and Stephen Summerskill. "An objective methodology for blind spot analysis of HGVs using a DHM approach." *DS 87-8 Proceedings of the 21st International Conference on Engineering Design (ICED 17) Vol 8: Human Behaviour in Design, Vancouver, Canada, 21-25.08. 2017.* 2017.

d. Frings, Daniel, Andy Rose, and Anne M. Ridley. "Bicyclist fatalities involving heavy goods vehicles: Gender differences in risk perception, behavioral choices, and training." *Traffic injury prevention* 13.5 (2012): 493-498.

e. Chew, Esther Li-Wen, and Amanda Stephens. "Human Factors That Impact HGV Drivers From Being Aware of VRUs Through Direct and Indirect Vision Mechanisms."

4.8 I think you need to reference this in the method section also where you discussed the data source. Some readers don't reach here

**Author's response:** We appreciate the reviewer's comment and suggestions. We have revised the manuscript. (please refer to 135 to 137; page 7 in the manuscript):

"The data that support the findings of this study are openly available at <https://figshare.com/ndownloader/files/48173452>."
